# Supplementary material for: Drought-related Changes in the Metabolism and Nutritional Properties of Mature Pea (<em>Pisum sativum L.</em>) Seeds in the Context of Protein Glycation
Source: Preprints.org preprint supplement (doi:10.20944/preprints201912.0133.v1), 2019-12-10
Supplement: Supplementary file 1 [file supplementary]

## Sheet: Directory
		Drought-related changes in the metabolism and nutritional properties of mature pea (Pisum sativum L.) seeds in the context of protein glycation
		Tatiana Leonova,1,2 Veronika Popova,1,3 Alexander Tsarev,1,2 Christian Henning,4 Kristina Antonova,1,2 Nadezhda Rogovskaya,5 Maria Vikhnina,1,2 Alena Soboleva,1,2 Ekaterina Dinastia,1,2,6 Mandy Dorn,2 Olga Shiroglasova,3 Gerd Balcke,7 Christian Ihling,8 Galina Smolikova,3 Sergei Medvedev,3 Vladimir A. Zhukov,9 Vladimir Babakov,5 Igor A. Tikhonovich,9,10 Marcus Glomb,4 Tatiana Bilova2,3 and Andrej…
		1Department of Biochemistry, St. Petersburg State University, 2Department of Bioorganic Chemistry, Leibniz Institute of Plant Biochemistry, 3Department of Plant Physiology and Biochemistry, St. Petersburg State University, 4Institute of Chemistry – Food Chemistry, Martin-Luther Universität Halle-Wittenberg, 5Research Institute of Hygiene, Occupational Pathology and Human Ecology,
		6Postovsky Institute of Organic Synthesis of Ural Division of Russian Academy of Sciences, 7Department of Metabolic and Cell Biology, Leibniz Institute of Plant Biochemistry, 8Department of Pharmaceutical Chemistry and Bioanalytics, Institute of Pharmacy, Martin-Luther Universität Halle-Wittenberg, 9All-Russia Research Institute for Agricultural Microbiology and 10Department of Genetics and Biote…
		Supplementary information 2
		Directory
		Table S2-1 In-house spectral library of primary metabolites - authentic standards with spectral information
		Table S2-2 The metabolites of pea (Pisum sativum L., cultivar SGE) seeds demonstrating at least 1.5-fold significant (p < 0.05) drought-related changes of their abundance in mature seeds
		Table S2-3 Matrix for pathway analysis of Pisum sativum L. seed metabolites built only for those demonstrating significant (p < 0.05) drought-related changes of at least 1.5-fold

## Sheet: Table S2-1
Table S2-1 The metabolites of pea (Pisum sativum L., cultivar SGE) seeds demonstrating at least 1.5-fold significant (p < 0.05) drought-related changes of their abundance in mature seeds
#	Metabolomic approach	m/z	tR	RI	Analyte	Tentative annotation	Peak area (control)						Peak area (stress)						Fold change (stress/control)	p (t-test)
1	Untargeted EI-GCMS	245	15.37		Maleic acid (2TMS)	Maleic acid	3567.04	1109.6	1965.12	2773.24	1769.68	3173.63	781.326	704.234	1294.3	1083.98	1192.45	1874.09	0.651085	0.0142129
2		218	18.61		L-Homoserine (3TMS)	Homoserine	1663.28	1689.32	1566.03	1348.5	2406.93	2671.01	7377.4	9844.35	13748.4	11585.4	4063.06	4106.23	1.63444	0.00248926
3		231	22.98		Asparagine (3TMS)	Asparagine	462.004	152.812	137.133	249.031	135.595	0	645.516	730.446	3214.73	3511.21	643.247	880.695	1.78879	0.0305506
4		374	26.47	1886	Unknown 1	-	1995.36	2687.98	3778.43	4298.26	1823.46	1817.15	978.806	935.298	802.16	868.279	984.389	1081.28	0.512471	0.00223584
5		292	37.31	2642	Unknown 2	Monosaccharide-derived acid	0	0	0	0	60.4066	0	57.7039	73.7051	173.237	197.416	39.3907	0	1.79927	0.0373114
6	Targeted ESI-LCMS (MRM)	156.96	0.582289		Allantoin	Allantoin	775.85	3145.11	2567.07	2294.42	4688.91	3806.31	1545.05	280.477	600.609	1387.79	579.826		0.305163	0.0129444
7		173.2	0.60986		ARG	Arginine	1.63172e+06	1.07295e+07	8.38744e+06	9.08487e+06	5.85972e+06	1.08522e+07	5.57067e+06	1.1556e+06	1.22463e+06	1.00649e+06	1.20186e+06		0.261918	0.0104086
8		154.2	0.62407		HIS	Histidine	3460.77	32574.3	34358	38548.2	38228.9	30726.5	20556.2	3332.24	6070.59	3306.05	5545.2		0.261794	0.00926824
9		104.1	0.659966		SER	Serine	7926.95	59254.9	45087.8	44974.1	54809.6	45318.5	27228.4	6738.99	15683.2	11358.5	9161.49		0.327172	0.00963295
10		74.1	0.66985		GLY	Glycine	13579.1	89157	49431.4	61655.5	85417.8	101197	48729.4	11555.9	20872.3	22908.6	16074.8		0.360029	0.0234174
11		145.1	0.682928		GLN	Glutamine	6249.92	51463.5	25891.5	30593.7	54009.1	65205.5	34271.3	3869.87	7447.35	8450.96	5416.92		0.305671	0.0376909
12		131.1	0.686222		ASN	Asparagine	9220.91	38917.8	35645.1	33563.4	30628.3	46531.9	26225.8	7991.49	8265.94	11278.2	11659.8		0.403612	0.0150349
13		178.9	0.697493		glucose	Glucose	8147.05	41418.5	25379.4	25935.3	32881	32125.5	14714.2	5581.35	5200.49	10787.9	7897.25		0.3196	0.00619718
14		341.1	0.722943		sucrose	Sucrose	269306	779807	615629	647825	714281	820659	499786	229144	264501	357867	242690		0.497149	0.0105638
15		148.2	0.847505		MET	Methionine	7166.45	19352.5	11642.1	15643.3	15947.7	18316.7	9625.42	6168.37	4557.89	6836.89	4124.96		0.42667	0.00442633
16		242.2	0.893644		PCHOL	Phosphocholine	286679	4.83666e+06	2.61549e+06	3.06383e+06	4.20474e+06	4.5401e+06	2.09426e+06	203322	217694	106425	136336		0.169313	0.010421
17		180.2	0.940792		TYR	Tyrosine	109571	1.05773e+06	925604	1.17019e+06	1.06395e+06	1.25114e+06	504248	102733	112815	255848	99195.6		0.231223	0.00613012
18		261.3	0.991804		LEU_+_ILE	Leucine and Isoleucine	0	3327.5	1272.93	834.578	1826.32	1260.94	598.751	0	216.438	219.966	99.5152		0.15977	0.0444317
19		243.2	0.997866		Uridine	Uridine	709669	4.37013e+06	3.30759e+06	4.27249e+06	4.76988e+06	5.05601e+06	2.11881e+06	637423	690993	1.32357e+06	857792		0.300381	0.00754372
20		131.2	1.13988		ORN	Ornithine	0	607.115	333.928	486.585	771.21	1134.95	350.598	73.1189	67.8606	0	81.3872		0.206239	0.0391722
21		146	1.26109		GLA	Glutamic acid	2.75883e+06	6.95834e+07	3.43353e+07	3.62574e+07	5.57346e+07	5.86745e+07	2.5202e+07	2.32119e+06	2.32823e+06	3.94802e+06	2.20285e+06		0.167879	0.0128013
22		132	1.42707		ASP	Aspartic acid	731158	3.47526e+07	1.80818e+07	2.00266e+07	2.48459e+07	3.568e+07	1.27431e+07	529745	401036	450596	418403		0.13012	0.0121982
23		383.4	1.46091		SAH	S-adenosyl-L-homocysteine	38598.6	3.13615e+06	851548	944184	2.38577e+06	3.43951e+06	797263	28392.6	26260.5	33495.3	28867.2		0.101626	0.0322573
24		282.2	1.47188		Guanosine	Guanosine	276474	1.35543e+06	665420	724232	1.50795e+06	2.47716e+06	520545	270870	281004	528750	265677		0.319726	0.0548725
25		164.2	1.6604		PHE	Phenylalanine	767483	2.55883e+06	1.96324e+06	2.46691e+06	1.80536e+06	1.87848e+06	1.16091e+06	668743	682437	1.56445e+06	762320		0.50756	0.0189794
26		258.2	1.95344		GA6P	Glucosamine-6-phosphate	640.083	15334	5873.95	6927.25	16902.5	14539.8	3303.22	754.163	194.582	84.5425	203.955		0.0904812	0.0135399
27		258.2	1.95613		GA1P	Glucosamine-1-phosphate	3936.23	246457	104201	123102	226868	196733	37514.8	2172.95	3233.86	2099.58	3605.53		0.0647423	0.00818484
28		175	2.06611		ASC	Ascorbic acid	6965.62	22834.7	12702.1	18679.4	15286.2	23798.1	10163.5	8101.2	8098.9	9211.22	4039.99		0.474116	0.0177971
29		172.892	2.12282		Shikimic_acid	Shikimic acid	13232.3	173963	126739	133429	175365	192513	75984.8	13982.7	12948.4	51647.6	13691.8		0.247665	0.0104252
30		266.2	2.34931		Adenosine	Adenosine	76633.1	260157	157588	228306	241677	273774	134156	75969.2	76619.1	154787	93585.8		0.518635	0.0247849
31		130.9	2.76		CarbamoylAla	3-Ureidopropionic acid	98.3407	238.461	436.714	538.875	729.358	93.4632	0	163.546	106.665	0	0		0.15186	0.0327475
32		190.932	3.28791		Quinic_acid	Quinic acid	0	156002	27834.9	34581.6	115700	126486	23170	1912.33	1042.19	3466.9	1339.06		0.0805823	0.0379428
33		203.2	3.36771		TRP	Tryptophan	159053	600695	405637	553065	505656	222053	44676	73785.3	124256	183719	172169		0.293655	0.00821349
34		89.1	3.48341		LAC	Lactic acid	11565.6	38999.4	17792.6	25646.1	32471.2	45853.9	12761.9	11369.3	0	23678.3	4573.5		0.364765	0.0263708
35		306.3	4.30946		GSH	Glutathione	1.10827e+06	8.55377e+07	2.61285e+07	3.15771e+07	5.68918e+07	7.3998e+07	1.61952e+07	710139	736862	778468	899607		0.0842328	0.0185995
36		155.1	4.6754		ORO	Orotic acid	0	22390.5	8600.65	8166.26	19229.7	28221	10011.8	0	0	4594.08	0		0.202372	0.0501286
37		87.1	4.9		PYR	Pyruvic acid	0	6587.44	0	4304.29	3567.36	1410.2	0	0	0	0	0		0	0.0530731
38		662.4	5.06998		NAD	Nicotinamide adenine dinucleotide	9978.82	652832	292981	321556	556225	552555	162703	6986.61	2548.86	4237.37	2136.75		0.0898256	0.00974263
39		215	5.61171		MEP	2-C-Methylerythritol 4-phosphate	3915.27	29619.9	10264	12812.2	24432.3	26917.1	11413.9	2268.7	7447.62	6654.7	0		0.308834	0.0355201
40		259.1	5.97615		G6P	Glucose-6-phosphate	9898.27	1.33819e+06	214415	303647	633381	1.22284e+06	141526	5024.36	3140.96	2127.95	4425.7		0.0503694	0.0426955
41		259.1	5.98585		F6P	Fructose-6-Phosphate	13765.9	2.08444e+06	346036	460920	966406	1.29665e+06	228667	9578.74	8967.85	0	10022.9		0.0597274	0.0422934
42		344.2	6.18526		cGMP	Cyclic guanosine monophosphate	560.889	7578.87	3220.67	1169.19	3902.98	3920.55	2007.26	0	496.978	562.72	0		0.180825	0.0419665
43		229.1	6.20285		R5P	Ribose-5-phosphate	0	61863.9	12720	18034.9	30788.9	32068.2	9481.49	0	0	0	0		0.0731804	0.0359777
44		199.1	6.29592		E4P	Erythrose-4-phosphate	0	53584.2	13324.5	11760.4	31074	29212.3	5412.64	0	0	0	0		0.0467428	0.030194
45		289.2	6.48288		S7P	Sedoheptulose-7-phosphate	0	181119	29781.8	41411.7	89996.1	99067	12878.1	0	0	0	0		0.0350125	0.0381157
46		171.1	6.61314		GLC3P	Glycerophosphoric acid	2808.68	363534	120965	133731	307444	301253	62765.3	3241.4	7183.04	3654.72	0		0.0749864	0.0159803
47		147.2	6.89927		MEVA	Mevalonic acid lactone	138452	154212	130038	135781	140384	160960	104852	92793.9	108446	137163	107401		0.768512	0.00355281
48		259.1	7.13009		G1P	Glucose-1-phosphate	0	261352	81118.7	138936	132997	294789	111677	0	9936.18	34120.7	0		0.205546	0.0504993
49		322.2	7.21549		CMP	Cytidine monophosphate	1989.34	295025	67969.4	74813.4	189523	234888	48395.3	1527.96	2139.27	2584.48	1872.23		0.0784801	0.0303097
50		323.2	8.0129		UMP	Uridine monophosphate	10364.1	1.88964e+06	287874	373903	898004	1.48955e+06	198451	5798.05	4745.8	4228.26	3282.26		0.052493	0.0448766
51		229.1	8.40488		R1P	Ribose-1-phosphate	0	18063.7	8728.67	11419	16336.5	11054.2	6633.16	0	0	0	0		0.121334	0.0132876
52		346.2	9.04765		AMP	Adenosine monophosphate	111973	8.63511e+06	2.83821e+06	3.33719e+06	6.13272e+06	7.60078e+06	2.14611e+06	74269.7	89659.6	57992.1	81173.6		0.102563	0.0192532
53		611.6	9.08909		GSSG	Oxiglutatione	11858.2	2.38074e+06	749845	998109	1.8532e+06	1.89251e+06	325770	10706.4	7783.79	4064.06	8962.31		0.0543658	0.0128198
54		565.3	10.0252		UDP_glucose	Uridine-5'-diphosphate-glucose	12074.3	820115	339404	338532	331270	491293	191327	8029.01	7968.31	4606.05	8672.6		0.113484	0.0209581
55		557.94	10.1796		ADP_ribose	Adenosine diphosphoribose	10428.7	1.9849e+06	780219	884649	1.39806e+06	1.59214e+06	473909	7761.51	10465.7	5849.99	12808.5		0.0921679	0.0131701
56		587.864	10.5798		ADP_Glucose	Adenosine diphosphate glucose	854.98	109600	24932.2	30511.9	59906.7	84891.3	22517.2	1133.23	723.4	545.291	293.723		0.0973792	0.0344655
57		145.01	10.7111		AKG	α-Ketoglutaric acid	74717.2	871138	392504	424053	569689	830711	349989	33775.8	139584	223469	54754.1		0.304124	0.0318862
58		277	10.8527		ME_2_4cPP	2C-Methyl-D-Erythritol 2,4-Cyclodiphosphate	2962.11	220256	60711.7	76039.5	131124	234451	63935.8	2195.9	2353.59	0	0		0.11327	0.0345097
59		664.4	11.2583		NADH	1,4-Dihydronicotinamide adenine dinucleotide	664.766	319668	53223.3	82917.5	162702	223273	27540	848.08	1547.31	662.828	1144.15		0.0452144	0.0337766
60		185.1	13.1204		3PG	3-Phosphoglyceric acid	19932.5	331382	33757.1	48731.7	303301	180086	22815.7	11039.4	13686.7	0	13062.9		0.0792918	0.0531228
61		784.5	13.1221		FAD	Flavin adenine dinucleotide	243.224	11898.4	4680.43	3647.67	11674.4	8898.17	3117.94	91.7439	111.821	0	113.445		0.100432	0.0208796
62		363.2	13.1387		XAN5P	Xanthosine-5'-phosphate	0	14560.5	1774.94	7464.03	10332.8	9615.66	885.59	0	0	1557.28	0		0.0670077	0.0234712
63		402.2	13.1517		CDP	Cytidine-5'-diphosphate	0	82330.6	9639.28	14267.9	38674.5	50224.8	6449.5	269.169	696.688	486.98	0		0.0485956	0.05373
64		403.2	13.3621		UDP	Uridine-5'-diphosphate	4248.98	1.03426e+06	141650	192660	493765	674100	77983	3649.06	2630.48	1944.05	2390.43		0.0418457	0.0458433
65		742.4	13.3926		NADP	Nicotinamide adenine dinucleotide phosphate	603.53	114805	39473	39594.2	101488	73517.9	22276.5	456.775	375.328	241.563	793.802		0.0784147	0.0186636
66		172.866	13.4093		Aconitic_acid	Aconitic acid	216316	7.69847e+06	2.80878e+06	3.582e+06	5.52896e+06	6.64691e+06	1.88509e+06	154573	186230	259019	161887		0.119939	0.0141383
67		401.2	13.4468		dTDP	Thymidine-5'-diphosphate	115.161	29217.2	4151.38	5498.35	16692.1	24429.6	3851.28	181.214	1310.45	516.604	451.703		0.0945462	0.052024
68		442.2	13.5064		GDP	Guanosine-5'-diphosphate	3635.93	296742	154009	138442	257141	286056	94060.8	2757.36	4302.34	2474.64	3912.13		0.113562	0.0120435
69		426.2	13.5093		ADP	Adenosine-5'-diphosphate	21488	4.10369e+06	957326	1.20222e+06	2.64766e+06	3.25836e+06	521967	12603.7	15063.6	8746.4	14546.2		0.0563963	0.0239245
70		275	13.9269		6PG	6-Phosphogluconic acid	0	69435.4	11967	14200.2	49240.9	59697.1	9314.14	0	1473.05	533.694	0		0.0664175	0.0386118
71		191	14.0291		CIT	Citric acid	1.50453e+07	5.98367e+08	1.8742e+08	2.10707e+08	4.11691e+08	6.01029e+08	1.73176e+08	8.96304e+06	7.29171e+06	5.98008e+06	8.89255e+06		0.121113	0.0265066
72		191.1	14.3422		ISOCIT	Isocitric acid	369272	1.21149e+07	5.22029e+06	5.78638e+06	1.14367e+07	1.07672e+07	4.11874e+06	237183	256907	522646	214112		0.140487	0.0153294
73		482.2	15.8034		CTP	Cytidine-5'-triphosphate	851.479	134950	29063.3	34541.5	86943.1	78640	12930.4	219.467	0	176.585	832.303		0.0465508	0.0272642
74		369	15.837		S7BP	Sedoheptulose 1,7-bisphosphate	0	17924.9	3360.76	2957.37	7244.3	10695.9	2406.83	0	0	0	0		0.0684677	0.054779
75		483.1	15.9919		UTP	Uridine-5'-triphosphate	4041.19	1.42438e+06	271785	337601	881104	842723	109718	4295.21	7101.3	4919.07	5413.91		0.0419333	0.0308009
76		506.2	16.0396		ATP	Adenosine triphosphate	46267.6	9.14262e+06	2.53129e+06	2.93898e+06	6.35828e+06	6.05198e+06	1.041e+06	27541.6	48962.2	22122.4	45455.9		0.0525354	0.0184156
77		481.2	16.0596		dTTP	Deoxythymidine-5'-triphosphate	515.846	45519.4	14972	9876.03	40679.7	30066.6	8752.99	510.038	0	230.253	0		0.0804348	0.0272384
78		522.2	16.1247		GTP	Guanosine-5'-triphosphate	5207.9	477757	206933	208142	383507	377046	126609	6191.73	9347.14	4437.1	7932.25		0.111794	0.013278
79		462.3	16.1464		Adenylo_Suc	Adenylosuccinic acid	1945.75	42163.9	9772.51	13377.1	29658.5	31333.2	4832.25	877.451	2649.95	2220.69	1267.02		0.110852	0.023051
80		744.4	16.4912		NADPH	Dihydronicotinamide-adenine dinucleotide phosphate	152.749	42285.1	11402.6	13232.5	31707.5	27273.7	4703.53	81.4042	207.727	99.9618	193.856		0.0503258	0.0193782
81		766.1	16.5418		CoA_01	Coenzyme A	72.1666	10654	3304.35	4084.1	12061.9	5541.38	2152.28	0	179.604	178.596	579.949		0.103828	0.0314185
82		389.1	17.4625		PRPP	5-Phosphoribosyl diphosphate	0	40299	7552.36	11095.4	37464.6	24994.1	1743.76	0	0	1092.63	0		0.0280356	0.0276153
83		807.9	17.5963		AcCoA	S-Acetyl coenzyme A	0	5887.48	763.126	1736.45	2975.74	5058.66	634.03	0	0	168.437	0		0.0586403	0.0392776
84		910.15	18.3612		HMG_CoA2	Hydroxymethylglutaroyl coenzyme A	161.496	5160.21	1913.66	1787.46	4459.01	2612.29	399.284	0	0	114.465	0		0.0383058	0.0130445
85		498.704	19.0491		IP4	Inositol-1,3,4,5-tetraphosphate	121934	1.1185e+07	3.46691e+06	2.77614e+06	7.1639e+06	7.26904e+06	1.80274e+06	62662.1	78754.5	46451.4	82770.8		0.0777932	0.0241066
86		578.755	19.2757		IP5	1-Diphosinositol pentakisphosphate	351711	1.43133e+07	9.65009e+06	3.24575e+06	6.08829e+06	7.04835e+06	3.96148e+06	197379	171169	141173	219935		0.138322	0.0321264
87		658.555	19.3367		IP6	Phytic acid	8.39249e+06	1.15915e+08	1.10645e+08	4.3408e+07	6.05455e+07	6.53102e+07	5.54532e+07	4.75582e+06	4.19702e+06	3.50238e+06	6.5203e+06		0.220957	0.0311766
88	Untargeted ESI-LCMS (SWATH negative mode)	741.434	15.23		Unknown 3	-	13330.5	35098.1	16604.6	23479.8	10099.1	23744	36838.8	28311.2	36023.9	31077.5	39414.1	31078.4	1.657	0.00816477
89		784.588	17.26		Unknown 4	wo_MS2_Phosphatidylethanolamine_alkenyl_18:0_22_1	1308.66	2395.3	930.784	312.987	1091.99	1676.86	2734.48	2384.67	1302.6	2236.55	3948.9	4819.76	2.2584	0.0212961
90		756.517	18.39		Unknown 5	wo_MS2_PE_18:1/13_HODE_	22536.6	32297.5	16102.7	17037	25742.6	21263.2	46042.2	18184.7	29636.2	46281.7	29889.2	42369.1	1.5736	0.0331233
91	Untargeted ESI-LCMS (SWATH positive mode)	130.159	2.94		Unknown 6	Tetraethylammonium cation	90064.6	439436	553950	359110	594091	798165	755196	615175	758375	902394	584340	790411	1.55421	0.0372476
92		67	3.12		Unknown 7	-	85910.5	52696.3	96592.4	105247	102320	70018.3	45262.6	42081.4	58365.5	26993.1	43956.1	54130.4	0.528076	0.0017018
93		68.0119	3.23		Unknown 8	-	58686.3	38977.7	28160.9	26400.4	29244.5	27831.1	18210.6	13236.4	25187.3	22656.2	26061.5	15813.7	0.578906	0.0241451
94		71.0491	6.3		Unknown 9	2-Butene-14-diol	50770	97025.8	72115.9	29643.6	11832.1	18648.4	84881	81783.7	275053	56353.7	119241	234888	3.04318	0.0360273
95		67.0302	6.98		Unknown 10	-	309511	323892	296140	175312	206314	188842	517859	370691	429968	238630	414533	343822	1.54366	0.0160286
96		85.039	7.04		Unknown 11	?3-Amino-124-triazole	14816.2	4506.4	10648	11068.9	7964.18	12396.5	27320.5	20102.3	17481.9	16686.9	4325.8	22915	1.77251	0.0477994
97		144.102	7.11		Unknown 12	?Propamocarb	4820.37	4328.37	6138.11	5039.77	6989.65	10105	10642.3	8692.73	9850.66	8676.93	8122.07	11033	1.52367	0.00819732
98		973.183	7.54		Unknown 13	-	0	346.483	10259.4	1705.44	3056.62	6995.55	35932.3	0	13194.3	33249.5	14136.5	11791.8	4.84291	0.0351356
99		972.683	7.56		Unknown 14	-	0	55.4372	3864.92	277.134	1022.65	2318.02	16569.9	0	4881.74	15887.5	6204.89	4539.31	6.37867	0.0369007
100		958.93	7.58		Unknown 15	-	0	0	11953.7	1355.63	2951.9	6144.51	34830.5	0	12808.6	35806.5	22029	11663.5	5.22803	0.0262246
101		958.424	7.58		Unknown 16	-	291.834	623.668	7953.7	878.883	2645.29	4153.08	18395.8	679.973	6663.3	19106.4	14106	7144.85	3.99459	0.0286046
102		85.0393	7.8		Unknown 17	?3-Amino-124-triazole	3958.13	3269.73	18297	5553.34	5680.21	5826.43	10682.1	20619.2	19229.4	13610.6	13847.9	12058.1	2.11454	0.0181429
103		951.66	8.2		Unknown 18	-	566534	820395	89363.5	450132	609250	162514	107566	157171	133721	122130	113897	172155	0.298956	0.0202105
104		67.0298	8.54		Unknown 19	-	281613	345463	520279	440383	547033	457195	309677	207720	251300	210296	301481	500100	0.686959	0.0502861
105		314.142	8.82		Unknown 20	Feruloyltyramine	902.034	9829.44	7999.07	8994.26	15061.4	14289	3609.16	559.978	7997.96	2776.9	3944.84	7119.85	0.455692	0.0540683
106		254.08	9.08		Unknown 21	3'-Hydroxy-D-sepiapterin	557.138	10265.5	4752.5	6927.38	8026.45	12146.5	3296.2	164.609	4672.33	1276.95	1747.65	5626.31	0.393296	0.0452441
107		130.086	9.08		Unknown 22	L-Lysine	4643.84	42043.8	18840.4	35993.5	35868.1	61841.9	13447.8	4706.73	21305.5	7208.55	10006.9	27178.3	0.420886	0.0532473
108		270.149	11.3		Unknown 23	Ritodrine	694.892	9069.31	6616.42	11897.4	12790.6	11935.8	2375.86	619.975	5043.07	4773.79	6346.79	5352.39	0.462449	0.0449553
109		156.138	11.31		Unknown 24	Butylate	2319.37	17836.9	11833.4	19915.9	22928.4	22170.7	4594.32	1924.54	9323.61	8793.02	12406	11168.9	0.496991	0.0476083
110		248.167	11.31		Unknown 25	4-Methoxy-.alpha.-pyrrolidinobutiophenone	2038.76	16808.1	11458.7	19501.1	24312.4	20983.5	4265.62	1826.08	9367.7	7663.73	11679.3	11470	0.486553	0.0502703
111		325.107	11.53		Unknown 26	?Benzenebutanamide N-(4-oxo-4H-31-benzothiazin-2-yl)	5152	6740.95	8535.56	5813.03	5364.17	5523.25	14868.1	5751.31	12962.9	10385.6	7169.67	9051.45	1.62108	0.0284794
112		188.165	12.38		Unknown 27	alpha-Methylaminohexanophenone	246151	126379	210488	128253	293997	353096	367289	495536	448240	532914	296059	348031	1.83167	0.00506978
113		132.102	12.38		Unknown 28	?(R)-3-Amino-4-methylpentanoic acid	6838.72	3769.73	5886.63	3676.39	6963.24	9846.53	8915.49	10899.6	11319.6	12992.5	9023.04	8794.92	1.67504	0.00523135
114		108.055	12.62		Unknown 29	24-Diaminotoluene	28529.4	5284.66	11186.5	18449.8	18285.9	15282.6	6924.81	2469.9	10973.9	11953.8	7262.05	9994.97	0.51103	0.0472909
115		81.043	12.64		Unknown 30	Pyrazine	33256.9	18170.6	20972.5	23237.6	24161.4	18068.6	13286.7	10608	16564.1	16925.2	17020.3	16181.1	0.657046	0.0109905
116		365.139	13.04		Unknown 31	?Triethyl phosphate	4163.23	11971.2	20558.3	18335.4	16502.9	21417.5	32098.2	8661.96	27806.5	27874.9	26969.1	25997.8	1.60743	0.0524491
117		252.109	13.8		Unknown 32	?Cordycepin	3147.93	2434.97	4332.38	2331.41	6359.46	3249.91	5212.82	8022.76	6297.57	6858.25	5323.92	4645.84	1.66366	0.0129214
118		204.142	14.23		Unknown 33	1-(Benzofuran-4-yl)-N-ethylpropan-2-amine	200450	219211	137514	67169.1	167687	172303	300535	288868	327187	283792	126753	192850	1.5762	0.0362198
119		108.054	14.64		Unknown 34	24-Diaminotoluene	12948.9	9803.86	8092.76	7208.39	9129.28	6730.66	17379.1	3246.02	24506.9	16758.2	16744.1	15060.4	1.73786	0.0492412
120		85.0388	14.75		Unknown 35	?3-Amino-124-triazole	5490.77	6913.66	4436.91	3469.02	8574.56	5936	18906.9	1895.31	18789.5	11481.3	9698.29	15537.6	2.19147	0.0307851
121		485.29	15.69		Unknown 36	Huperzine A	1.1115e+06	677209	674665	1.04043e+06	1.00493e+06	873017	392506	494193	598656	602338	853470	453814	0.630831	0.00856661
122		467.279	15.69		Unknown 37	10-hydroxyusambarine	15211.1	9455.24	8154.89	14741.4	13911.4	12827.3	4953.56	6343.59	8046.06	7779.81	11899.3	5918.72	0.604848	0.0104085
123		615.37	15.69		Unknown 38	Pleiomutinine	40915	11847.6	12400.5	31495.4	33320.9	19365.4	3419.35	8779.65	10084.1	9179.97	23671.9	6371.99	0.411846	0.0278813
124		133.101	15.69		Unknown 39	2-Methylamino-1-phenylbutane	113791	49198.4	54555.6	79003.5	81093.7	64089.7	35810.1	49624.2	49006.8	49569.8	64346	40959.2	0.654959	0.0341532
125		222.196	16.03		Unknown 40	?Tapentadol-beta-D-glucuronide	1704.07	3818.77	2606.53	1341.1	3608.51	7565.75	3425.83	6725.88	6594.16	5862.35	10398.3	6052.42	1.89196	0.0397731
126		663.468	16.47		Unknown 41	-	8380.55	11586.4	9314.66	10225.9	12040.6	11000.8	15047.7	30966.5	11480.9	21546.2	14271.7	13109.2	1.70143	0.0374759
127		712.49	17.86		Unknown 42	?Phosphatidylethanolamine (16:0/16:1) Abbr: PPoPE or (14:0/18:1) Abbr: MOP	33055.9	20678.1	13934	16749.2	17482.1	25705.7	30467.7	26732.8	25945.8	46728.8	54147.7	27373.9	1.65665	0.034678
128		758.563	17.96		Unknown 43	1-Palmitoyl-2-linoleoyl-sn-glycero-3-phosphocholine	197843	173241	179133	167700	171103	218306	20047.6	105461	149017	210418	159128	28462	0.60735	0.0469229
129		784.582	17.97		Unknown 44	Arachidonoylthiophosphorylcholine	296674	198719	358713	337625	413654	277995	8684.02	190988	300170	346041	177478	14047.3	0.550822	0.0547287
	this matrix was inserted in MetaboAnalyst;
	features with > 80% of missing value were removed, missing values were replaced by a small value (half of the minimum positive value in the original data);
	scale by Paretto method (mean-centered and divided by the square root of the standard deviation of each variable)
	grey color markes analytes that did not pass through statistical threshold (FC>1.5, t-test p value <0.1, FDR adjusted), and therefore the marked features were not mentioned in the Supplementary Information Table S1-7 (for thermally stabile metabolites) and Table S1-8 (for thermally unstable metabolites)

## Sheet: Table S2-2
Table S2-2 In-house spectral library of thermally stable primary metabolites - authentic standards with spectral information
MIX1		peak 1 (MP)						peak 2 (BP)
Compound name	TMS and MEOX	RT	RI	m/z1	m/z2	m/z3		RT	RI	m/z1	m/z2	m/z3
L-Alanine	?
L-(-)-Malic acid	3TMS	19.412	1503.3	233	147
D(+)- Glucose anhydrous	5TMS,1MEOX	27.3	1936.3	319	205			27.5856	1953.9	319	205
N-Acetyl-D-glucosamine (= 2-Acetamido-2-deoxy-D-glucose)	4TMS, 1MEOX	30.0891	2113.3	333	319			30.184	2119.6	333	319
D(-)-Fructose	5TMS,1MEOX	26.858	1909.2	217	307			27.034	1920	217	307
MIX 2
γ-Aminobutyric acid (= GABA)	3TMS	20.143	1540	174	304
Xylitol	5TMS	23.923	1739.5	217	307	319
D-(+)-Mannose	5TMS,1MEOX	27.102	1924	319	205			27.3346	1938.4	319	205
Fumaric acid	2TMS	16.216	1353.4	245	147
MIX 3
Sucrose	8TMS	38.1313	2709.6	361	437
Glycerol phosphate disodium salt hydrate	4TMS	24.2054	1755.4	299	243		Glycerol-2P	24.8769	1793	299	357	445	Glycerol-3P
D-(-)- Arabinose	4TMS, 1MEOX	23.0732	1692.34	217	307
L-Valine	?	13.377	1228.7	218	184
Succinic acid	2TMS	15.5111	1321.8	247	147
MIX 4
L-Proline	2TMS	15.1813	1307	142	216
D-Sorbitol (=glucitol)	6TMS	27.962	1977.1	319	307	205
L-Glutamine	?
Malonic acid	2TMS	13.11	1217.4	147	233	248
MIX 5
Mucic acid (=Galactaric acid)	6TMS	29.6738	2086	333	292
Maleic acid	2TMS	15.3399	1314.1	147	245
Benzoic acid	?
Octanoic acid (=Caprylic acid, C8:0)	?
L-(-)-Sorbose	5TMS,1MEOX	26.8654	1909.6	217	307			26.9606	1915.5	217	307
Citric acid	4TMS	25.7558	1844.2	273	375	347
MIX 6
D-(+)-Galactose	5TMS,1MEOX	27.1929	1929.7	319	205	217		27.5323	1950.6	319	205	217
Glycerol (=1,2,3-Propanetriol)	3TMS	14.771	1289	205	218	117
L-Aspartic acid	2TMS	17.9466	1433.1	160	245	130		20.0665	1536.1	232	218	3TMS
D(+)- Xylose	4TMS,1MEOX	22.7689	1676.2	217	307	103		22.952	1685.9	217	307	103
Malic acid	3TMS	19.4018	1502.7	233	147	245
MIX 7
Sodium pyruvate	?
Tryptamine (=1H-Indole-3-ethanamine)	2TMS	31.631	2217.2	174	130	289		31.9625	2240.4	174	273	100	3TMS
Ascorbic acid	4TMS			332	374	205
D(-)-Ribose	4TMS,1MEOX	23.3464	1707.2	217	307	103
Maltotriose hydrate	11TMS, 1MEOX	48.7835	3680.4	204	361	480
MIX 8
Raffinose	11TMS	46.629	3502.8	361	204	437
α-ketoglutaric acid (=2-Oxoglutaric acid)	2TMS, 1MEOX	21.129	1589.7	198	156
L-Methionine	2TMS	19.8959	1527.5	176	128	250
Glycine	3TMS	15.394	1316.5	174	248	276
D(-)-Mannitol	6TMS	27.838	1969.3	319	307	205
MIX 9
L-Serine	2TMS	14.3246	1269.8	116	132	219		16.6903	1374.8	204	218	278	3TMS
Urea	2TMS	13.7873	1246.5	189	147	171
Palmitic acid	1TMS	29.0527	2046.1	313	117
Myo-inositol	6TMS	30.3147	2128.4	305	318	432
D(-)-Erythrose	3TMS,1MEOX	18.4883	1459	205	117	161		18.8	1473.8	205	117	161
L-(+)-Tartaric acid (=L-Threaric acid)	4TMS	22.5128	1662.6	292	219	189
MIX 10
D-(-)-Isoascorbic acid (=erythorbic acid, D-araboascorbic acid, D-erythro-2-enoic acid γ-lactone	?
Oxalic acid dihydrate (=Ethanedioic acid dihydrate)	?
Nicotinic acid (=3-Pyridinecarboxylic acid)	1TMS	14.9671	1297.5	180	136	106
Salicylic acid	2TMS	19.7169	1518.5	267	209
L-Homoserine	2TMS	16.5316	1367.7	146	103	130		18.5773	1463.2	218	128	103	3TMS
MIX 11
β-Alanine	3TMS	17.9999	1435.7	248	174	290
DL-Norvaline (=(±)-2-Aminopentanoic acid)	2TMS	13.9318	1252.8	144	218
L-Rhamnose monohydrate (= 6-Deoxy-L-mannose)	4TMS,1MEOX	24.0604	1747.2	117	160	277		24.1663	1753.2	117	160	277
Glycolic acid	?
Decanoic acid (=Capric acid, C10:0)	?
MIX 12
meso-Erythritol (=1,2,3,4-Butanetetrol)	4TMS	19.9424	1529.9	217	205	307
D-Glucuronic acid	5TMS,1MEOX	27.9239	1974.7	333	160	364		28.1619	1989.3	333	292	160
α-Lactose monohydrate (= 4-O-β-D-Galactopyranosyl-α-D-glucose)	8TMS,1MEOX	38.7897	2764.7	204	361	480				204	361	480
DL-Glyceraldehyde	2TMS,1MEOX	13.5102	1234.6	281	160	103
L-Leucine	2TMS	14.6429	1283.5	158	218
MIX 13
L-Threonine	2TMS	15.1331	1304.9	219	117	130
D-(+)-Galacturonic acid monohydrate	5TMS,1MEOX	20.0503	1982.4	333	160	305		28.3387	2000.2	333	292	160
DL-Lysine-monohydrochloride	3TMS	26.1038	1864.5	174	200	258		27.3402	1938.8	174	156	317	4TMS
Glyoxylic acid monohydrate	?
Valeric acid (=Pentanoic acid)	?
MIX 14
D-Glyceric acid sodium salt	3TMS	16.0245	1344.9	189	292	205
L-Pyroglutamic acid (=(S)-(−)-2-Pyrrolidone-5-carboxylic acid)	2TMS	19.9384	1529.7	156	230	258
L-Cysteine	3TMS	20.6978	1567.9	220	100	295
L-Isoleucine	2TMS	15.1325	1304.8	158	218	232		12.41	1187	86	146	188	1TMS
Gallic acid (=3,4,5-trihydroxybenzoic acid)	4TMS	27.9641	1977.1	281	443	458
MIX 15
D-Erythronic acid potassium salt	4TMS	20.657	1565.9	292	205	220
Vanillin	1TMS,1MEOX
L-(-)-Fucose (= 6-Deoxy-L-galactose)	4TMS,1MEOX	24.2105	1755.7	117	277	160		24.4043	1766.5	117	277	160
Glutamic acid	3TMS
DL-Ornithine hydrochloride anhyrous	3TMS	24.3584	1763.9	174	244	348		25.6176	1836.1	142	174	200	4TMS
MIX 16
L-Histidine monohydrochloride monohydrate	?
Glutaric acid	2TMS	17.4411	1409	261	158	233
trans-Caffeic acid (= 2-propenoic acid)	3TMS	28.3206	1999.1	219	396	381
cys-Caffeic acid (= 2-propenoic acid)	3TMS	30.6156	2148.5	219	396	381
L(-)-Phenylalanine	1TMS	20.4173	1553.8	120	146	130		22.0617	1638.6	219	192	266	2TMS
DL-Tryptophan	2TMS	31.6866	2221.1	202	130
MIX 17
Adenine	2TMS	26.2976	1875.9	264	279
2-Phenylglycine (= (±)-α-Aminophenylacetic acid)	2TMS	19.9243	1529	178	147			18.1138	1441.1	106	79
L-Arginine monohydrochloride	?
Glutaric acid (=pentanedioic acid)	2TMS	17.4423	1409.1	261	158	233
Glycolaldehyde dimer (=1,4-Dioxane-2,5-diol; Hydroxyacetaldehyde dimer)	?
MIX 18
Cinnamic acid	1TMS	20.2733	1546.5	205	131	161
Phloroglucinol, anhydrous (=1,3,5-Trihydroxybenzene)	3TMS	22.3626	1654.6	342	327
Shikimic acid	4TMS	25.5116	1829.9	204	254
cys-Ferulic acid	2TMS	27.2405	1932.7	338	323	249
trans-Ferulic acid	2TMS	29.8891	2099.9	338	323	249
Putrescine (= 1.4-butanediamine)	4TMS	24.0978	1749.3	174	214
MIX 19
Vanillic acid	2TMS	24.4944	1771.6	297	267	223
Quinic acid	5TMS	26.5803	1892.5	345	255
D-(+)-Trehalose α,α' dihydrate	8TMS	39.3632	2813.2	361	191	319
D-Glucaric acid calcium salt (Calcium D-saccharate tetrahydrate)	6TMS	29.1836	2054.5	333	292	373
D-Ribose-5-phosphate disodium hydrate (25.53 mM - old stock)	5TMS,1MEOX	30.6926	2153.7	315	299	217
Mix 25
Melibiose	8TMS,1MEOX	40.8966	2948.3	361	204	480		41.2162	2977	204	361	217
Galactitol (=Dulcitol)	6TMS	28.0038	1979.6	217	205	319
MIX 20
D(-)-Erythrulose	3TMS,1MEOX	19.0964	1488	262	173	103		19.3179	1498.5	262	173	103
D-(+)-Maltose monohydrate	8TMS,1MEOX	39.3961	2816.1	361	480			39.7185	2844.2	361	319
Erythrose-4-phosphate sodium	4TMS,1MEOX	27.4978	1948.5	357	299	341				357	299	341
Ribulose	4TMS,1MEOX	23.3526	1707.6	263	205
Mannose-1-phosphate	6TMS,1MEOX	33.8643	2376.1	387	299	315		33.8728	2376.7	387	299	315
MIX 21
Galactinol	9TMS	42.2266	3070.2	204	217	191
Fructose-6-phosphate	6TMS,1MEOX	33.6716	2362.1	315	299	357
Isomaltose	8TMS,1MEOX	40.9425	2952.4	361	204	480		41.3057	2985	361	204	217
Dihydroxyacetone phosphate dilithium salt	3TMS,1MEOX	24.465	1769.9	299	315	400		24.474	1770.4	299	315	400
Dulcitol (=Galactitol)	6TMS	28.0531	1982.6	217	205	319
MIX 22
Glucose-6-phosphate	6TMS,1MEOX	33.8478	2374.9	387	299	357		34.0881	2392.3	387	299	315
Turanose	8TMS,1MEOX	39.5513	2829.6	217	361	307		39.8766	2857.9	217	361	307
D-glyceraldehyde-3-phosphate (gap)	3TMS,1MEOX	23.7787	1731.5	299	211	384		23.9805	1742.8	299	211	384
D(-)-Phospho-glyceric acid (gip)	4TMS	25.6357	1837.1	299	357	315
MIX 23
Raffinose	11TMS	46.6171	3501.6	361	217	437
Fructose-1.6-biphosphate	7TMS
	7TMS,1MEOX	39.0425	2785.9	315	299	459		39.1343	2793.6	315	299	387
DH-ascorbate	2MEOX
MIX 24
Ribulose-1.5-biphosphate (=D-erythro-2-Pentulose)	5TMS,1MEOX	36.6653	2590	357	299	387		36.8495	2604.6	357	299	387
Erlose	11TMS	47.1124	3545.2	361	204	271		437

## Sheet: Table S2-3
Table S2-3 Matrix for pathway analysis of Pisum sativum L. seed metabolites built only for those demonstrating significant (p < 0.05) drought-related changes of at least 1.5-fold
		LCMS data
	KEGG	C00337	C00212	C00620	C00079	C00089	C00072	C00438	C00475	С11434	C00186	C00256	C00152	C00037	C00188	C11453	C00065	C00387	C00031	C00064	C01551	C00026	C00299	C00295	C00078	C02642	C00062	C00135	C00493	C00122	C00103	C00047	C00082	C01204	C00077	C11436	C00942	C00061	C00117	C00588	C00025	C00281	C00279	C00311	C11174	C00049	C00655	C00158	C02341
	HMDB	HMDB0000528	HMDB0000050	HMDB0001489	HMDB0000159	HMDB0000258	HMDB0000044	HMDB0000828	HMDB0000089	-	HMDB0000190	HMDB0001311	HMDB0000168	HMDB0000123	HMDB0000167	-	HMDB0000187	HMDB0000133	HMDB0000122	HMDB0000641	HMDB0000462	HMDB0000208	HMDB0000296	HMDB0000226	HMDB0000929	HMDB0000026	HMDB0000517	HMDB0000177	HMDB0003070	HMDB0000134	HMDB0001586	HMDB0000182	HMDB0000158	HMDB0003502	HMDB0000214	-	HMDB0001314	HMDB0001520	HMDB0001548	HMDB0001565	HMDB0000148	HMDB0001068	HMDB0001321	HMDB0000193	HMDB0012494	HMDB0000191	HMDB0001554	HMDB0000094	HMDB0000958
	PubChem CID	648	60961	439236	57397115	5988	54670067	279	6175	31	612	612	6267	750	6288	126747	5951	135398635	5793	5961	204	51	6029	967	6305	111	6322	6274	8742	444972	65533	5962	6057	890	6262	443200	135398570	643976	77982	1014	33032	165007	122357	1198	127296	5960	73323	311	309
Sample	Class	DHO	Adenosine	R1P	PHE	sucrose	ASC	CA	Cytidine	MEP	LAC		ASN	GLY	THR	ME_2_4cPP	SER	Guanosine	glucose	GLN	Allantoin	AKG	Uridine	ORO	TRP	CarbamoylAla	ARG	HIS	Shikimic_acid	FUM	G1P	LYS	TYR	IP6	ORN	CDP_ME_2P	cGMP	FMN	R5P	PCHOL	GLA	S7P	E4P	ISOCIT	IP5	ASP	XAN5P	CIT	Aconitic_acid
S7	Drought	8345	134156	6633	1160910	499786	10163	3711	2274	9625	12762	12762	26226	48729	82296	11414	27228	520545	14714	34271	1545	349989	2118809	10012	44676	74	5570671	20556	75985	1862121	111677	72594931	504248	55453171	351	409	2007	624989	9481	2094259	25202024	12878	5413	4118743	3961479	12743075	886	173176259	1885090
S8	Drought	6071	75969	5614	668743	229144	8101	1270	1143	6168	11369	11369	7991	11556	22877	2269	6739	270870	5581	3870	280	33776	637423	801	73785	164	1155597	3332	13983	166783	20526	5730475	102733	4755825	73	73	384	3141	1220	203322	2321186	6595	3196	237183	197379	529745	1262	8963043	154573
S9	Drought	6559	76619	7145	682437	264501	8099	994	536	4558	7057	7057	8266	20872	21142	7448	15683	281004	5200	7447	601	139584	690993	4101	124256	107	1224633	6071	12948	181316	9936	5759073	112815	4197022	68	171	497	4688	2035	217694	2328234	11934	2510	256907	171169	401036	908	7291709	186230
S10	Drought	7411	154787	6566	1564449	357867	9211	1368	2095	6837	23678	23678	11278	22909	30263	6655	11359	528750	10788	8451	1388	223469	1323565	4594	183719	57	1006488	3306	51648	533977	34121	20314070	255848	3502382	44	591	563	11240	5627	106425	3948025	18670	4561	522646	141173	450596	1557	5980078	259019
S11	Drought	5274	93586	4755	762320	242690	4040	782	826	4125	4573	4573	11660	16075	17686	1888	9161	265677	7897	5417	580	54754	857792	3055	172169	68	1201862	5545	13692	216783	11312	7389809	99196	6520298	81	315	198	5496	4265	136336	2202850	8140	2315	214112	219935	418403	100	8892546	161887
S12	Drought	6205.13	96428.2	6004.73	806401	265398	7750.5	1068.67	1045.46	5090.3	8709.69	8800.79	9910.91	17841.2	22501.3	5241.13	10567.9	298412	6818.21	6567.55	668.83	110568	836018	3269.63	134833	85.93	1.21084e+06	5021.78	21156.2	265404	16583.3	8.69279e+06	121055	5.02276e+06	75.07	281.18	387.3	17370.7	3127.72	190800	2.42851e+06	10408	2895.26	258752	184588	442588	883.15	9.49936e+06	212099
S1	Control	4017	76633	6218	767483	269306	6966	1469	1327	7166	11566	11566	9221	13579	22438	3915	7927	276474	8147	6250	776	74717	709669	3849	159053	98	1631718	3461	13232	255856	25149	8927186	109571	8392489	42	115	561	2368	2951	286679	2758830	14578	4631	369272	351711	731158	1053	15045257	216316
S2	Control	16072	260157	18064	2558831	779807	22835	5296	6147	19352	38999	38999	38918	89157	173624	29620	59255	1355430	41419	51463	3145	871138	4370126	22390	600695	238	10729488	32574	173963	4391445	261352	182519798	1057734	115915374	607	2829	7579	1325269	61864	4836660	69583423	181119	53584	12114892	14313321	34752620	14560	598366686	7698470
S3	Control	10099	157588	8729	1963235	615629	12702	3602	2793	11642	17793	17793	35645	49431	57499	10264	45088	665420	25379	25892	2567	392504	3307586	8601	405637	437	8387444	34358	126739	1387359	81119	55423981	925604	110644884	334	1625	3221	511170	12720	2615488	34335255	29782	13324	5220294	9650087	18081830	1775	187420025	2808779
S4	Control	8777	228306	11419	2466907	647825	18679	5195	2306	15643	25646	25646	33563	61656	67463	12812	44974	724232	25935	30594	2294	424053	4272492	8166	553065	539	9084871	38548	133429	1678625	138936	65264321	1170190	43408027	487	114	1169	396312	18035	3063833	36257408	41412	11760	5786383	3245748	20026626	7464	210706890	3581997
S5	Control	12355	241677	16336	1805358	714281	15286	2421	2501	15948	32471	32471	30628	85418	99657	24432	54810	1507950	32881	54009	4689	569689	4769884	19230	505656	729	5859720	38229	175365	1822608	132997	70092344	1063951	60545514	771	1619	3903	626921	30789	4204745	55734557	89996	31074	11436713	6088292	24845940	10333	411690677	5528962
S6	Control	16685	273774	11054	1878476	820659	23798	3412	3897	18317	45854	45854	46532	101197	163621	26917	45318	2477158	32126	65205	3806	830711	5056013	28221	222053	93	10852165	30726	192513	4947263	294789	192340382	1251136	65310180	1135	2247	3921	1095122	32068	4540104	58674538	99067	29212	10767239	7048346	35680012	9616	601028903	6646906
All data is already normalised to FW; missing values were filled by QRILC algorithm via MetImp (https://metabolomics.cc.hawaii.edu) and marked with pink color
Missing values for S12 sample were filled by RF algorythm (only drought samples were used as matrix) via MetImp (https://metabolomics.cc.hawaii.edu) and marked with yellow color
Pathway analysis was performed via MetaboAnalyst (https://www.metaboanalyst.ca)
For more information please refer to Supplementary information 3 and 4
[truncated: 45 more columns]
