# Supplementary material for: Drought-related Changes in the Metabolism and Nutritional Properties of Mature Pea (<em>Pisum sativum L.</em>) Seeds in the Context of Protein Glycation
Source: Preprints.org preprint supplement (doi:10.20944/preprints201912.0133.v1), 2019-12-10
Supplement: Supplementary file 2 [file supplementary]

**Drought-related changes in the metabolism and nutritional properties of mature pea (*Pisum sativum* L.) seeds in the context of protein glycation**

Tatiana Leonova,<sup>1,2</sup> Veronika Popova,<sup>1,3</sup> Alexander Tsarev,<sup>1,2</sup> Christian Henning,<sup>4</sup> Kristina Antonova,<sup>1,2</sup> Nadezhda Rogovskaya,<sup>5</sup> Maria Vikhnina,<sup>1,2</sup> Alena Soboleva,<sup>1,2</sup> Ekaterina Dinastia,<sup>1,2,6</sup> Mandy Dorn,<sup>2</sup> Olga Shiroglasova,<sup>3</sup> Tatiana Grishina,<sup>1</sup> Gerd U. Balcke,<sup>7</sup> Christian Ihling,<sup>8</sup> Galina Smolikova,<sup>3</sup> Sergei Medvedev,<sup>3</sup> Vladimir A. Zhukov,<sup>9</sup> Vladimir Babakov,<sup>5</sup> Igor A. Tikhonovich,<sup>9,10</sup> Marcus Glomb,<sup>4</sup> Tatiana Bilova<sup>2,3</sup> and Andrej Frolov<sup>1,2\*</sup>

**Supplementary information 1**

<sup>1</sup>Department of Biochemistry, St. Petersburg State University, <sup>2</sup>Department of Bioorganic Chemistry, Leibniz Institute of Plant Biochemistry, <sup>3</sup>Department of Plant Physiology and Biochemistry, St. Petersburg State University, <sup>4</sup>Institute of Chemistry - Food Chemistry, Martin-Luther Universität Halle-Wittenberg, <sup>5</sup>Research Institute of Hygiene, Occupational Pathology and Human Ecology, <sup>6</sup>Postovsky Institute of Organic Synthesis of Ural Division of Russian Academy of Sciences, <sup>7</sup>Department of Metabolic and Cell Biology, Leibniz Institute of Plant Biochemistry, <sup>8</sup>Department of Pharmaceutical Chemistry and Bioanalytics, Institute of Pharmacy, Martin-Luther Universität Halle-Wittenberg, <sup>9</sup>All-Russia Research Institute for Agricultural Microbiology and <sup>10</sup>Department of Genetics and Biotechnology, St. Petersburg State University

\*Corresponding author:

Dr. Andrej Frolov,  
Leibniz Institute of Plant Biochemistry  
Department of Bioorganic Chemistry  
Weinberg 3  
06120, Halle (Saale), Germany  
Tel. +49 (0) 345 5582 1350  
Fax. +49 (0) 345 5582 1359  
Email: afrolov@ipb-halle.de

## Directory

|                                                                                                                                                                                                                                                      |              |
|------------------------------------------------------------------------------------------------------------------------------------------------------------------------------------------------------------------------------------------------------|--------------|
| <b>Protocols.....</b>                                                                                                                                                                                                                                | <b>S1-6</b>  |
| <b>Protocol S1-1</b> Isolation of carboxypeptidase Y from yeast <i>Saccharomyces cerevisiae</i> .....                                                                                                                                                | <b>S1-6</b>  |
| <b>Protocol S1-2</b> Identification of carboxypeptidase Y from yeast <i>Saccharomyces cerevisiae</i> ...                                                                                                                                             | <b>S1-8</b>  |
| <b>Protocol S1-3</b> Determination of hydrogen peroxide contents.....                                                                                                                                                                                | <b>S1-9</b>  |
| <b>Protocol S1-4</b> Determination of lipid hydroperoxide contents.....                                                                                                                                                                              | <b>S1-10</b> |
| <b>Protocol S1-5</b> Determination of malondialdehyde (MDA) contents.....                                                                                                                                                                            | <b>S1-11</b> |
| <b>Protocol S1-6</b> Determination of ascorbic and dehydroascorbic acid contents.....                                                                                                                                                                | <b>S1-12</b> |
| <b>Protocol S1-7</b> Separation of proteins by SDS-PAGE.....                                                                                                                                                                                         | <b>S1-13</b> |
| <b>Protocol S1-8</b> Removal of SDS from protein hydrolyzates by solid phase extraction (SPE).                                                                                                                                                       | <b>S1-14</b> |
| <b>Tables.....</b>                                                                                                                                                                                                                                   | <b>S1-15</b> |
| <b>Table S1-1</b> Drought-regulated (at least 1.5-fold) thermally stabile primary metabolites of <i>Pisum sativum</i> L. seeds analyzed by untargeted gas chromatography-electron ionization-quadrupole mass spectrometry (GC-EI-Q-MS) approach..... | <b>S1-15</b> |
| <b>Table S1-2</b> Drought-regulated thermally stabile primary metabolites of <i>Pisum sativum</i> L. seeds.....                                                                                                                                      | <b>S1-17</b> |
| <b>Table S1-3</b> Protein recoveries and total UV densities for individual pea protein samples separated by SDS-PAGE.....                                                                                                                            | <b>S1-26</b> |
| <b>Table S1-4</b> Proteins identified in the tryptic digests obtained from isolated and reference carboxypeptidase Y of yeast <i>Saccharomyces cerevisiae</i> .....                                                                                  | <b>S1-27</b> |
| <b>Table S1-5</b> The conditions of ultrahigh performance liquid chromatographic (UHPLC) separation and the settings for electrospray ionization-triple quadrupole-tandem mass                                                                       |              |

|                                                                                                                                                                                                                                                                                                                                       |       |
|---------------------------------------------------------------------------------------------------------------------------------------------------------------------------------------------------------------------------------------------------------------------------------------------------------------------------------------|-------|
| spectrometry (ESI-QqQ-MS/MS) used for analysis of abscisic acid (ABA) in methanolic extracts of pea ( <i>Pisum sativum</i> L., cultivar SGE) seeds.....                                                                                                                                                                               | S1-34 |
| <b>Table S1-6</b> Gas chromatographic (GC) separation conditions and electron ionization-quadrupole-mass spectrometry (EI-Q-MS) settings for analysis of <i>Pisum sativum</i> L. primary thermally stabile metabolites.....                                                                                                           | S1-37 |
| <b>Table S1-7</b> The conditions of ion pair-reversed phase ultrahigh performance liquid chromatographic (IP-RP-UHPLC) separation and the settings for electrospray ionization-triple quadrupole-tandem mass spectrometry (ESI-QqQ-MS/MS) used for analysis of <i>Pisum sativum</i> L. anionic primary thermo labile metabolites..... | S1-38 |
| <b>Table S1-8</b> The conditions of ultrahigh performance liquid chromatographic (UHPLC) separation and the settings for electrospray ionization-quadrupole-time of flight mass spectrometry (ESI-QqTOF-MS) applied for the analysis of <i>Pisum sativum</i> L. semi-polar secondary metabolites.....                                 | S1-46 |
| <b>Table S1-9</b> Composition of the alkane mixture used for determination of Kovats retention time indices (RIs) .....                                                                                                                                                                                                               | S1-49 |
| <b>Figures</b> .....                                                                                                                                                                                                                                                                                                                  | S1-51 |
| <b>Figure S1-1</b> Cultivation of pea ( <i>Pisum sativum</i> L., cultivar SGE) plants.....                                                                                                                                                                                                                                            | S1-51 |
| <b>Figure S1-2</b> Optimization of experimental drought conditions applied to pea plants pea ( <i>Pisum sativum</i> L., cultivar SGE) plants at the stage of seed maturation.....                                                                                                                                                     | S1-52 |
| <b>Figure S1-3</b> Morphology and anatomy of pea ( <i>Pisum sativum</i> L., cultivar SGE) seed.....                                                                                                                                                                                                                                   | S1-53 |
| <b>Figure S1-4</b> Characterization of the stress response in pea ( <i>Pisum sativum</i> L., cultivar SGE) leaves.....                                                                                                                                                                                                                | S1-54 |

|                                                                                                                                                                                                                                                            |       |
|------------------------------------------------------------------------------------------------------------------------------------------------------------------------------------------------------------------------------------------------------------|-------|
| <b>Figure S1-5</b> The results of the principal component analysis (PCA), done for the abundances of the primary thermally stabile polar metabolites.....                                                                                                  | S1-55 |
| <b>Figure S1-6</b> The results of the principal component analysis (PCA), done for the abundances of the primary thermally labile anionic polar metabolites.....                                                                                           | S1-56 |
| <b>Figure S1-7</b> The results of the principal component analysis (PCA), done for the abundances of the anionic semi-polar secondary metabolites.....                                                                                                     | S1-57 |
| <b>Figure S1-8</b> The results of the principal component analysis (PCA), done for the abundances of the cationic semi-polar secondary metabolites.....                                                                                                    | S1-58 |
| <b>Figure S1-9</b> Pathway analyses accomplished separately for the drought-regulated primary polar metabolites of pea ( <i>Pisum sativum</i> L., cultivar SGE) seeds annotated by untargeted GC-EI-Q-MS and targeted IP-RP-UHPLC-MS/MS.....               | S1-59 |
| <b>Figure S1-10</b> The PLS-DA model and loadings plot, designed for 1092 of 2667 semi-polar features annotated by RP-UHPLC-QqTOF-MS operated in positive SWATH mode.....                                                                                  | S1-61 |
| <b>Figure S1-11</b> Hierarchical clustering analysis of 51 up-regulated and 15 down-regulated drought-related semi-polar metabolite MS features using the corresponding MS/MS spectra obtained from RP-UHPLC-QqTOF-MS operated in positive SWATH mode..... | S1-62 |
| <b>Figure S1-12</b> The PLS-DA model and loadings plot, designed for 207 of 376 semi-polar metabolites identified by RP-UHPLC-QqTOF-MS operated in negative SWATH mode.....                                                                                | S1-63 |
| <b>Figure S1-13</b> Hierarchical cluster analysis (HCA) of 12 up-regulated drought-related semi-polar metabolites (MS <sup>1</sup> ) using the corresponding MS/MS spectra obtained from RP-UHPLC-QqTOF-MS operated in negative SWATH mode).....           | S1-64 |
| <b>Figure S1-14</b> SDS-PAGE electropherograms of pea seed protein before and after exhaustive enzymatic hydrolysis (n=5) .....                                                                                                                            | S1-65 |

|                                                                                                                                                                                                                                                               |       |
|---------------------------------------------------------------------------------------------------------------------------------------------------------------------------------------------------------------------------------------------------------------|-------|
| <b>Figure S1-15</b> The effects of pea seed protein hydrolyzates on the NF- $\kappa$ B-mediated signaling pathway in SH-SY5Y human neuroblastoma cells: optimization of the applied protein amounts.....                                                      | S1-66 |
| <b>Figure S1-16</b> The effects of pea seed protein hydrolyzates on the NF- $\kappa$ B-mediated signaling pathway in SH-SY5Y human neuroblastoma cells: optimization of the applied protein amounts.....                                                      | S1-68 |
| <b>Figure S1-17</b> The effects of pea seed protein hydrolyzates on the NF- $\kappa$ B-mediated signaling pathway in SH-SY5Y human neuroblastoma cells: optimization of incubation times.....                                                                 | S1-70 |
| <b>Figure S1-18</b> SDS-PAGE electropherograms of yeast carboxypeptidase Y purchased from Merck (Sigma-Aldrich GmbH), and carboxypeptidase Y isolated from the yeast <i>Saccharomyces cerevisiae</i> according to the protocol of Johansen <i>et al</i> ..... | S1-72 |
| <b>References</b> .....                                                                                                                                                                                                                                       | S1-73 |

## Protocols

### Protocol S1-1 Isolation of carboxypeptidase Y from yeast *Saccharomyces cerevisiae* [1]

Carboxypeptidase Y was isolated from baker yeast (*S. cerevisiae*) by affinity chromatography on a Sepharose 4B-Gly-Tyr-azobenzylbutanedioic acid sorbent. The affinity resin was prepared as follows: 25 mg of the sorbent Sepharose 4B were washed, re-suspended in 25 mL water and activated by the addition of 4.25 mg cyanogen bromide under continuous stirring. The pH was maintained at 10.5 by continuous addition of 6 mol/L NaOH, and temperature maintained at 20°C by addition of ice for 10-15 min. Afterwards, the activated Sepharose was filtered, washed with 250 mL water and 125 mL ice-cold 0.1 mol/L NaHCO<sub>3</sub> (pH 9.5) and suspended in 25 mL of the same buffer containing 250 mg Gly-Tyr (within 5 min time limit). The resulting solution was incubated at 4°C for 3 days. Afterwards, 50 mg *p*-aminobenzylsuccinic acid was dissolved in 10 mL 1 mol/L HCl, mixed with 5 mL 0.3 mol/L NaNO<sub>2</sub>, the mixture was stirred for 10 min at 4°C and added to the ice-cold suspension of 25 mL Sepharose-Gly-Tyr. The pH value was adjusted to 9.5. After 3 h of reaction at 4°C the Sepharose derivate turned orange and was washed with 50 mL ice-cold 0.1 mol/L NaHCO<sub>3</sub> (pH 9.5) and 250 mL water. The resulted affinity resin could be stored over long periods at 4°C as an aqueous suspension.

Approximately 500 g of compressed *S. cerevisiae* yeast were frozen in liquid nitrogen and ground in a Mixer Mill MM 400 ball mill with a 20 mm stainless steel ball (Retsch, Haan, Germany) at a vibration frequency of 30 Hz for 1 min. The resulted powder was supplemented with 500 mL ether and, one hour later, 750 mL of water was added, before the pH of the solution was adjusted to 7.4 with 1 mol/L NaOH. The resulting suspension was incubated for 24 hours at 25°C and centrifuged (10000 g, 10 min, 4°C) to remove the cell debris. The supernatant was collected, the pH value was adjusted to 5.0, and the solution was incubated for 24 hours at 30°C under constant stirring and centrifuged afterwards (10000 g, 10 min, 4°C). The resulted supernatant was concentrated to 100 mL in a vacuum evaporator (Rotavapor R-114, Büchi, Essen, Germany), and pH was re-adjusted to 5.0. Then, the affinity resin and 100 mL 10 mmol/L

2-(*N*-morpholino)ethansulfonic acid (MES) buffer (pH 5.0) were added to the solution and stirred at 4°C overnight. The resulted suspension was washed with 1 mol/L NaCl containing 10 mmol/L sodium acetate (pH 4.3) until absorbance of the eluate at 280 nm decreased below 0.005 units. The retained carboxypeptidase Y was eluted with 0.01 mol/L sodium phosphate buffer (pH 7.0). The resulted eluate was concentrated and desalted by ultrafiltration (Vivaspin Turbo 3 kDa MWCO filters). The aqueous enzyme solution was frozen and stored at -20°C. The preparation was analyzed by SDS-PAGE (see Protocol S1-7 and Figure S1-1) and by liquid chromatography-mass spectrometry (LC-MS, Protocol S1-2). The commercially available carboxypeptidase Y purchased from Sigma-Aldrich GmbH/Merk (No C3888) served as an analytical reference for SDS-PAGE and LC-MS analysis.

**Protocol S1-2** Identification of carboxypeptidase Y from yeast *Saccharomyces cerevisiae*

The protein concentration in the carboxypeptidase Y isolate was determined by 2D Quant Kit according to the manufacturer's instructions. Afterwards, in-gel digestion of proteins was performed as described by Majovski et al [2]. Protein samples (10 µg) were separated by SDS-PAGE (Protocol S1-7 and Figure S1-1). Two gel bands on each lane were excised and destained with 30% (v/v) acetonitrile, 100 mmol/L NH<sub>4</sub>HCO<sub>3</sub> (pH 8.5). The samples were sequentially incubated with 10 mmol/L DTT, 100 mmol/L NH<sub>4</sub>HCO<sub>3</sub> (pH 8.5) for 30 min at 50°C to reduce disulfide bonds, and then with 54 mmol/L iodoacetamide, 100 mmol/L NH<sub>4</sub>HCO<sub>3</sub> (pH 8.5) for 15 min at 22°C in dark to provide alkylation. Protein digestion was performed by adding of 70 µL trypsin (3 ng/µL in 100 mmol/L NH<sub>4</sub>HCO<sub>3</sub> solution) and overnight incubation at 37°C. Peptides were extracted from the gel with 35% (v/v) acetonitrile, 0.4 % (v/v) trifluoroacetic acid. After this, the digests were pre-cleaned by solid phase extraction (SPE) on Stage-Tips filled with C<sub>18</sub> matrix (3M™ Empore Extraction Disks, Pittsburgh, USA) as described by Mamontova *et al* [3]. In detail, the Stage-Tips were pre-conditioned with 100 µL of methanol and equilibrated with 200 µL of 0.1% (v/v) trifluoroacetic acid (twice). After load of the peptide solution, the unbound components were washed out by two portions 200 µL of 0.1% (v/v) aqueous formic acid. Afterwards, retained tryptic peptides were sequentially eluted with 50 µL of 40%, 60%, 80% (v/v) aq. acetonitrile. The combined eluates were dried and reconstituted in aq. 0.1% (v/v) formic acid solution containing decreasing amounts of acetonitrile to obtain its final concentration of 3% (v/v). The mass spectrometric analysis relied on nano-scaled high-performance liquid chromatography coupled on-line to electrospray ionization-linear ion trap-orbital trap hybrid mass spectrometer (nanoHPLC-ESI-LIT-Orbitrap-MS) as described by Mamontova *et al* [4].



**Protocol S1-3** Determination of hydrogen peroxide contents

Approximately 100 mg of the plant material were extracted with 1 mL of ice-cold 0.4 mol/L perchloric acid. Samples were vortexed for 30 s and centrifuged (10 000 g, 10 min, 4 °C). The supernatant was neutralized with KOH, diluted four-fold with sodium phosphate buffer (0.1 mol, pH 5.6) and supplemented with ascorbate oxidase (8 units, 2 µL in 4 mmol/L sodium phosphate buffer pH 5.6, 10 min, RT). Afterwards, two aliquots (500 µL each) were transferred to new polypropylene tubes, with one of them treated with catalase (50 units in 2 µL in 4 mmol/L sodium phosphate buffer pH 5.6, 2 min, RT). Both aliquots were supplemented with an equal volume of the FOX reagent (0.2 mmol/L xylenol orange, 200 mmol/L sorbitol, 50 mmol/L H<sub>2</sub>SO<sub>4</sub>, and 0.5 mmol/L (NH<sub>4</sub>)<sub>2</sub> Fe(SO<sub>4</sub>)<sub>2</sub>), and incubated for 30 min in the dark before measurement of the Fe(II)-xylenol orange complex absorption at 575 nm. The values obtained for the catalase-treated samples were subtracted from those of the catalase-free ones, to obtain the corrected optical densities. The calibration was performed externally by an H<sub>2</sub>O<sub>2</sub> serial dilution series (1–10 µmol/L).

**Protocol S1-4** Determination of lipid hydroperoxide contents

Approximately 10 mg of frozen milled plant material were left for 5 min on ice, before 750  $\mu\text{L}$  of ice-cold chloroform-methanol mixture (1:2, v/v) and 150  $\mu\text{L}$  of 0.15 mol/L aq. acetic acid were added and the suspension was vortexed for 30 s. Then, chloroform and water (225  $\mu\text{L}$  each) were added, the suspension was vortexed for 30 s and centrifuged at 3000 g for 5 min. The lower phase was collected, transferred to black polypropylene tubes and dried under nitrogen flow provided by a sample concentrator (Bibby Scientific Limited, Staffordshire, UK) for 30 – 60 min. The residue was reconstituted in 100  $\mu\text{L}$  0.01% butylated hydroxytoluene (BHT) in methanol and left on ice for 30 min before 900  $\mu\text{L}$  of working FOX reagent (1.0 mmol/L xylenol orange and 2.5 mmol/L ammonium ferrous sulfate in 250 mmol/L  $\text{H}_2\text{SO}_4$  – 0.01% BHT in methanol, 1 : 9, v/v) was added. After 30 min incubation on ice, absorption was measured at 650 nm against working FOX reagent. Hydroperoxide content was calculated as 13*S*-hydroperoxy-9*Z*, 11*E*-octadecanoic acid equivalents,  $\varepsilon = 6.0 \times 10^4 \text{ M}^{-1}\text{cm}^{-1}$  [5].

**Protocol S1-5** Determination of malondialdehyde (MDA) contents

Approximately 25 mg of frozen grinded plant material were left on ice for 3 minutes, before addition of 300  $\mu\text{L}$  5% (w/v) trichloroacetic acid (TCA), vortexed for 30 s and centrifuged at 10000 g for 20 minutes at 4°C. 250  $\mu\text{L}$  of supernatant were transferred in a new polypropylene tube, and 1000  $\mu\text{L}$  of thiobarbituric acid (TBA) reagent (0.5 % w/v TBA in 20% TCA) were added. The mixture was incubated for 30 min in boiling water bath (95°C). Afterwards, the mixture was cooled on ice to stop the reaction, centrifuged at 1900 g for 10 minutes at 4°C and 1 ml of colored supernatant was used to measure the absorbance at 532 nm against the proper blank (250  $\mu\text{L}$  5% w/v TCA and 750  $\mu\text{L}$  TBA reagent). The non-specific absorbance at 600 nm was subtracted from the absorbance acquired at 532 nm. The contents of MDA equivalents were calculated with  $\epsilon = 155 \text{ mM}^{-1}\text{cm}^{-1}$ .

**Protocol S1-6** Determination of ascorbic and dehydroascorbic acid contents

Approximately 50 mg of frozen plant material were left on ice for 5 min before 0.5 mL of ice-cold 2.5 mol/L  $\text{HClO}_4$  were added. The suspensions were vortexed for 30 s and centrifuged for 10 min at 10000 g and 4°C. The supernatants were transferred in new polypropylene tubes, neutralized with saturated  $\text{Na}_2\text{CO}_3$  solution and 10-fold diluted with 0.1 mol/L sodium phosphate buffer (pH 5.6). For determination of ascorbic acid, 500  $\mu\text{L}$  of diluted extract were placed in a quartz cell and absorbance at 265 nm was recorded (Gemini EM microplate reader, Molecular Devices (Germany) GmbH, Biberach, Germany) before 1 u of ascorbate oxidase (i.e. 1  $\mu\text{L}$  in 4 mmol/L sodium phosphate buffer) was added, and absorbance was recorded once more two minutes later. Total ascorbate was quantified after reduction of diluted extract with DTT (3  $\mu\text{L}$  of 3 mol/L solution) for 1 min on ice at the same wavelength. Dehydroascorbic acid was calculated as the difference of the total ascorbate and ascorbic acid contents.

**Protocol S1-7** Separation of proteins by SDS-PAGE

Polyacrylamide gel electrophoresis in sodium dodecyl sulfate (SDS-PAGE) was performed with a 12% separating and a 4% stacking gel (T=12%, C=2.65%) [6]. The aliquots of protein (10 µg) or aliquots of enzymatic hydrolysates, corresponding to 30 µg of protein, were dried under reduced pressure and reconstituted in 10 µL of sample buffer, containing 0.02% (w/v) bromophenol blue, 20% (v/v) glycerol, 2% (w/v) SDS, 5% (v/v) β-mercaptoethanol in 50 mmol/L Tris-HCl (pH 6.8) and completely loaded on each lane. After completion of separation (15 min at 90 V, 60 min at 130 V), gels were stained with Coomassie Brilliant Blue G-250 for 1 h. Average densities across individual lanes (expressed in arbitrary units) were determined by ChemiDoc XRS imaging system controlled by Quantity One 1-D analysis software (Bio-Rad Laboratories Ltd). For calculation of relative standard deviations (RSDs), the densities of individual lines were normalized to the gel average value.

**Protocol S1-8** Removal of SDS from protein hydrolyzates by solid phase extraction (SPE)

The SPE was accomplished on the reversed phase using Chromabond C<sub>18</sub> endcapped polypropylene columns and vacuum manifold (operated under the pressure of 850 mbar) to remove the detergent as described by Antonova *et al* [7]. In detail, the cartridges were pre-conditioned with 6 mL of methanol, equilibrated with 6 mL of water, and then the hydrolysates were applied. The fractions, containing amino acids were sequentially eluted with 12 mL of 25 mmol/L aq. ammonium acetate and 12 mL of 100 mmol/L aq. ammonia. The flow-through and both eluate fractions were saved in one 50-mL polypropylene tube and freeze-dried. The residues were sequentially re-constituted in two portions of 0.75 mL of 20% aq. acetonitrile, transferred into 2 mL polypropylene tubes, freeze-dried, and stored afterwards at -20°C.

## Tables

**Table S1-1** Drought-regulated (at least 1.5-fold) thermally stabile primary metabolites of *Pisum sativum* L. seeds analyzed by untargeted gas chromatography-electron ionization-quadrupole mass spectrometry (GC-EI-Q-MS) approach (t-test  $p$  value < 0.05, FDR adjusted:  $p$  < 0.10).

| Analyte           | Annotation                   | RI <sup>a</sup> | KEGG <sup>b</sup> | $m/z$ <sup>c</sup> | $t_R$ <sup>d</sup> | FC <sup>e</sup> | Raw p <sup>f</sup> | FDR <sup>g</sup> |
|-------------------|------------------------------|-----------------|-------------------|--------------------|--------------------|-----------------|--------------------|------------------|
| Homoserine (3TMS) | homoserine <sup>h</sup>      | 1368            | C00263            | 218                | 18.61              | 4.5             | 0.002              | 0.019            |
| Unknown 1         | -                            | 2966            |                   | 204                | 41.09              | 3.0             | 0.014              | 0.055            |
| Unknown 2         | -                            | 3971            |                   | 204                | 53.34              | 2.2             | 0.001              | 0.019            |
| Unknown 3         | oligosaccharide <sup>i</sup> | 3200            |                   | 340                | 43.58              | 1.8             | 0.015              | 0.056            |
| Unknown 4         | carbohydrate <sup>i</sup>    | 2475            |                   | 361                | 35.21              | 1.8             | 0.000              | 0.000            |
| Unknown 5         | carbohydrate <sup>i</sup>    | 2491            |                   | 361                | 35.40              | 1.8             | 0.000              | 0.000            |
| Unknown 6         | sugar acid <sup>i</sup>      | 2007            |                   | 292                | 28.46              | 1.7             | 0.000              | 0.002            |
| Unknown 7         | -                            | 1789            |                   | 217.05             | 24.81              | 1.7             | 0.022              | 0.078            |
| Unknown 8         | -                            | 1870            |                   | 174.1              | 26.2               | 1.7             | 0.013              | 0.056            |
| Unknown 9         | -                            | 2987            |                   | 456                | 41.33              | 1.6             | 0.000              | 0.008            |
| Unknown 10        | -                            | 1841            |                   | 292                | 25.71              | 1.6             | 0.009              | 0.040            |

|                         |                                |      |        |        |       |     |       |       |
|-------------------------|--------------------------------|------|--------|--------|-------|-----|-------|-------|
| Unknown 11              | -                              | 4068 |        | 204.05 | 54.76 | 1.6 | 0.016 | 0.072 |
| Turanose (1MEOX, 8TMS)  | turanose <sup>h</sup>          | 2837 | C19636 | 243    | 39.63 | 1.6 | 0.000 | 0.002 |
| Melibiose (1MEOX, 8TMS) | melibiose <sup>h</sup>         | 2836 | C05402 | 361    | 39.62 | 1.5 | 0.000 | 0.007 |
| Unknown 12              | -                              | 2975 |        | 204    | 41.19 | 1.5 | 0.000 | 0.008 |
| Mannose (1MEOX, 5TMS)   | mannose <sup>h</sup>           | 1926 | C00159 | 319    | 27.12 | 0.6 | 0.024 | 0.072 |
| Unknown 13              | inositol isomer-1 <sup>i</sup> | 1988 |        | 318    | 28.15 | 0.6 | 0.002 | 0.019 |
| Unknown 14              | inositol isomer-2 <sup>i</sup> | 1991 |        | 318    | 28.22 | 0.5 | 0.002 | 0.019 |
| Maleic acid (2TMS)      | maleic acid <sup>h</sup>       | 1315 | C01384 | 245    | 15.37 | 0.5 | 0.014 | 0.055 |
| Unknown 15              | -                              | 1886 |        | 374    | 26.47 | 0.3 | 0.002 | 0.019 |

The analytes were identified by co-elution with authentic standards or by spectral similarity using spectral libraries – NIST 8.0 (National Institute of Standards and Technology) or GMD (GolmMetabolom Database, updated 17/02/2017, <http://gmd.mpimp-golm.mpg.de>). The seeds were obtained from the plants exposed during two days (at the seed maturation step) to the aqueous medium supplemented with 2.5% (w/v) PEG 8000 (stress, n = 6) in comparison to the seeds of the plants, treated with PEG-free medium (control, n = 6).

<sup>a</sup> RI, Kovats retention Index; <sup>b</sup> the metabolite identical numbers of Kyoto Encyclopedia of Genes and Genomes (KEGG) database; <sup>c</sup> the *m/z* refers to compound-specific fragment ions, selected for quantification by peak areas at characteristic extracted ion chromatograms; <sup>d</sup> retention time (*t<sub>R</sub>*, min); <sup>e</sup> fold change was calculated as abundance (peak areas at characteristic extracted ion chromatograms) ratio drought/control; <sup>f</sup> and <sup>g</sup> *p* values calculated



without (RAW p) and with false discovery rate (FDR) correction by Benjamini-Hochberg method, respectively; <sup>h</sup> and <sup>i</sup> the metabolite annotations were relied on RI,  $t_R$  and mass-spectrum of the standard compounds as indicated in Supplementary Information 2, Table S2-1 or relied on  $m/z$  value(s) characteristic for the mentioned chemical group (some of the characteristic  $m/z$  values are given as following:  $m/z$  361, 319, 217, 103 – carbohydrate and oligosaccharide;  $m/z$  103, 292, 333 - sugar acid;  $m/z$  305, 318 - inositol isomer), respectively.

**Table S1-2** Drought-regulated (at least 1.5-fold, t-test:  $p < 0.05$ , FDR adjusted:  $p < 0.10$ ) thermally unstable primary metabolites of *Pisum sativum* L. seeds analyzed by targeted ion pair-reversed phase ultrahigh performance liquid chromatography, coupled on-line to electrospray ionization-triple quadrupole-tandem mass spectrometry (IP-RP-UHPLC-ESI-QqQ-MS/MS), performed in negative multiple reaction monitoring (MRM).

| Metabolite                       | Acronim | KEGG <sup>a</sup> | $m/z$ <sup>b</sup> | $t_R$ <sup>c</sup> | FC <sup>d</sup> | RAW p <sup>e</sup> | FDR <sup>f</sup> |
|----------------------------------|---------|-------------------|--------------------|--------------------|-----------------|--------------------|------------------|
| Dihydroorotic acid               | DHO     | C00337            | 157.1              | 3.57               | 0.6             | 0.086              | 0.096            |
| Adenosine                        | -       | C00212            | 266.2              | 2.35               | 0.5             | 0.025              | 0.073            |
| Ribose-1-phosphate               | R1P     | C00620            | 229.1              | 8.40               | 0.5             | 0.013              | 0.071            |
| Phenylalanine                    | PHE     | C00079            | 164.2              | 1.66               | 0.5             | 0.019              | 0.071            |
| Sucrose                          | -       | C00089            | 341.1              | 0.72               | 0.5             | 0.011              | 0.071            |
| Ascorbic acid                    | ASC     | C00072            | 175                | 2.07               | 0.5             | 0.018              | 0.071            |
| Ureidosuccinic acid              | CA      | C00438            | 175.1              | 10.01              | 0.5             | 0.083              | 0.077            |
| Cytidine                         | -       | C00475            | 242.2              | 0.81               | 0.4             | 0.057              | 0.086            |
| 2-C-Methylerythritol 4-phosphate | MEP     | C11434            | 215                | 5.61               | 0.4             | 0.036              | 0.071            |

|                                             |       |                 |        |       |     |       |       |
|---------------------------------------------|-------|-----------------|--------|-------|-----|-------|-------|
| Lactic acid                                 | LAC   | C00186 / C00256 | 89.1   | 3.48  | 0.4 | 0.026 | 0.074 |
| Asparagine                                  | ASN   | C00152          | 131.1  | 0.69  | 0.4 | 0.015 | 0.071 |
| Glycine                                     | GLY   | C00037          | 74.1   | 0.67  | 0.4 | 0.023 | 0.072 |
| Threonine                                   | THR   | C00188          | 118.1  | 0.68  | 0.4 | 0.062 | 0.091 |
| 2C-Methyl-D-Erythritol 2,4-Cyclodiphosphate | MEcPP | C11453          | 277    | 10.85 | 0.3 | 0.035 | 0.075 |
| Serine                                      | SER   | C00065          | 104.1  | 0.66  | 0.3 | 0.010 | 0.071 |
| Guanosine                                   | -     | C00387          | 282.2  | 1.47  | 0.3 | 0.055 | 0.085 |
| Glucose                                     | GLC   | C00031          | 178.9  | 0.70  | 0.3 | 0.006 | 0.071 |
| Glutamine                                   | GLN   | C00064          | 145.1  | 0.68  | 0.3 | 0.038 | 0.075 |
| Allantoin                                   | ALT   | C01551          | 156.96 | 0.58  | 0.3 | 0.013 | 0.071 |
| $\alpha$ -Ketoglutaric acid                 | AKG   | C00026          | 145.01 | 10.71 | 0.3 | 0.032 | 0.074 |
| Uridine                                     | -     | C00299          | 243.2  | 1.00  | 0.3 | 0.008 | 0.071 |
| Orotic acid                                 | ORO   | C00295          | 155.1  | 4.68  | 0.3 | 0.050 | 0.077 |

|                                                        |              |        |         |       |     |       |       |
|--------------------------------------------------------|--------------|--------|---------|-------|-----|-------|-------|
| Tryptophan                                             | TRP          | C00078 | 203.2   | 3.37  | 0.3 | 0.008 | 0.071 |
| 3-Ureidopropionic acid                                 | CarbamoylAla | C02642 | 130.9   | 2.76  | 0.3 | 0.033 | 0.084 |
| Arginine                                               | ARG          | C00062 | 173.2   | 0.61  | 0.3 | 0.010 | 0.071 |
| Histidine                                              | HIS          | C00135 | 154.2   | 0.62  | 0.3 | 0.009 | 0.071 |
| Shikimic acid                                          | SHIC         | C00493 | 172.892 | 2.12  | 0.3 | 0.010 | 0.071 |
| Fumaric acid                                           | FUM          | C00122 | 115.101 | 10.11 | 0.3 | 0.069 | 0.097 |
| Glucose-1-phosphate                                    | G1P          | C00103 | 259.1   | 7.13  | 0.2 | 0.050 | 0.077 |
| Lysine                                                 | LYS          | C00047 | 145.2   | 0.69  | 0.2 | 0.078 | 0.097 |
| Tyrosine                                               | TYR          | C00082 | 180.2   | 0.94  | 0.2 | 0.006 | 0.071 |
| Phytic acid                                            | IP6          | C01204 | 658.555 | 19.34 | 0.2 | 0.031 | 0.074 |
| Ornithine                                              | ORN          | C00077 | 131.2   | 1.14  | 0.2 | 0.039 | 0.074 |
| 4-Diphosphocytidyl-2-C-methyl-D-erythritol 2-phosphate | CDP-ME-2P    | C11436 | 600.0   | 15.85 | 0.2 | 0.056 | 0.085 |

|                                    |        |                 |         |       |     |       |       |
|------------------------------------|--------|-----------------|---------|-------|-----|-------|-------|
| Cyclic guanosine monophosphate     | cGMP   | C00942          | 344.2   | 6.19  | 0.2 | 0.042 | 0.079 |
| Riboflavin-5'-phosphate            | FMN    | C00061          | 498.814 | 0.56  | 0.2 | 0.058 | 0.086 |
| Lactic acid                        | LAC.1  | C00186 / C00256 | 89.1    | 3.48  | 0.2 | 0.026 | 0.077 |
| Ribose-5-phosphate                 | R5P    | C00117          | 229.1   | 6.20  | 0.2 | 0.036 | 0.077 |
| Phosphocholine                     | PCHOL  | C00588          | 242.2   | 0.89  | 0.2 | 0.010 | 0.071 |
| Glutamic acid                      | GLA    | C00025          | 146     | 1.26  | 0.2 | 0.013 | 0.071 |
| Sedoheptulose-7-phosphate          | S7P    | C00281          | 289.2   | 6.48  | 0.2 | 0.038 | 0.077 |
| Erythrose-4-phosphate              | E4P    | C00279          | 199.1   | 6.30  | 0.2 | 0.030 | 0.074 |
| Isocitric acid                     | ISOCIT | C00311          | 191.1   | 14.34 | 0.1 | 0.015 | 0.071 |
| 1-Diphosinositol pentakisphosphate | IP5    | C11174          | 578.755 | 19.28 | 0.1 | 0.032 | 0.074 |
| Aspartic acid                      | ASP    | C00049          | 132     | 1.43  | 0.1 | 0.012 | 0.071 |
| Xanthosine-5'-phosphate            | XAN5P  | C00655          | 363.2   | 13.14 | 0.1 | 0.023 | 0.072 |
| Citric acid                        | CIT    | C00158          | 191     | 14.03 | 0.1 | 0.027 | 0.074 |

|                                |             |        |         |       |     |       |       |
|--------------------------------|-------------|--------|---------|-------|-----|-------|-------|
| Aconitic acid                  | ACT         | C02341 | 172.866 | 13.41 | 0.1 | 0.014 | 0.071 |
| D-Malate                       | MAL         | C00497 | 133.1   | 10.10 | 0.1 | 0.069 | 0.074 |
| Guanosine-5'-diphosphate       | GDP         | C00035 | 442.2   | 13.51 | 0.1 | 0.012 | 0.071 |
| Uridine-5'-diphosphate-glucose | UDP-glc     | C00029 | 565.3   | 10.03 | 0.1 | 0.021 | 0.071 |
| Guanosine-5'-triphosphate      | GTP         | C00044 | 522.2   | 16.12 | 0.1 | 0.013 | 0.071 |
| Adenylosuccinic acid           | Adenylo-Suc | C03794 | 462.3   | 16.15 | 0.1 | 0.023 | 0.072 |
| Coenzyme A                     | CoA         | C00010 | 766.1   | 16.54 | 0.1 | 0.089 | 0.074 |
| Adenosine monophosphate        | AMP         | C00020 | 346.2   | 9.05  | 0.1 | 0.019 | 0.071 |
| S-adenosyl-L-homocysteine      | SAH         | C00021 | 383.4   | 1.46  | 0.1 | 0.032 | 0.074 |
| Flavin adenine dinucleotide    | FAD         | C00016 | 784.5   | 13.12 | 0.1 | 0.021 | 0.071 |
| Adenosine diphosphate glucose  | ADP-Glc     | C00498 | 587.864 | 10.58 | 0.1 | 0.034 | 0.074 |
| Thymidine-5'-diphosphate       | dTDP        | C00363 | 401.2   | 13.45 | 0.1 | 0.052 | 0.084 |
| Adenosine diphosphate ribose   | ADP-ribose  | C00301 | 557.94  | 10.18 | 0.1 | 0.013 | 0.071 |

|                                              |       |        |         |       |     |       |       |
|----------------------------------------------|-------|--------|---------|-------|-----|-------|-------|
| Glucosamine-6-phosphate                      | GA6P  | C00352 | 258.2   | 1.95  | 0.1 | 0.014 | 0.071 |
| Nicotinic acid ribonucleotide                | NAAM  | C01185 | 333.885 | 19.40 | 0.1 | 0.730 | 0.071 |
| Glutathione                                  | GSH   | C00051 | 306.3   | 4.31  | 0.1 | 0.019 | 0.071 |
| Deoxythymidine-5'-triphosphate               | dTTP  | C00459 | 481.2   | 16.06 | 0.1 | 0.028 | 0.074 |
| 3-Phosphoglyceric acid                       | 3PG   | C00597 | 185.1   | 13.12 | 0.1 | 0.054 | 0.085 |
| Quinic acid                                  | QUIN  | C06746 | 190.932 | 3.29  | 0.1 | 0.038 | 0.075 |
| Cytidine monophosphate                       | CMP   | C00055 | 322.2   | 7.22  | 0.1 | 0.030 | 0.074 |
| 1,4-Dihydronicotinamide adenine dinucleotide | NADH  | C00004 | 664.4   | 11.26 | 0.1 | 0.019 | 0.071 |
| Inositol-1,3,4,5-tetrphosphate               | IP4   | C01272 | 498.704 | 19.05 | 0.1 | 0.024 | 0.072 |
| S-Acetylcoenzyme A                           | AcCoA | C00024 | 807.9   | 17.60 | 0.1 | 0.037 | 0.075 |
| 6-Phosphogluconic acid                       | 6PG   | C00345 | 275     | 13.93 | 0.1 | 0.040 | 0.077 |
| Glycerophosphoric acid                       | GLC3P | C00093 | 171.1   | 6.61  | 0.1 | 0.016 | 0.071 |
| Glucosamine-1-phosphate                      | GA1P  | C00137 | 258.2   | 1.96  | 0.1 | 0.008 | 0.071 |

|                                   |         |        |         |       |      |       |       |
|-----------------------------------|---------|--------|---------|-------|------|-------|-------|
| 5-Phosphoribosyl diphosphate      | PRPP    | C00119 | 389.1   | 17.46 | 0.1  | 0.030 | 0.074 |
| Fructose-6-Phosphate              | F6P     | C00085 | 259.1   | 5.99  | 0.1  | 0.042 | 0.077 |
| Adenosine-5'-diphosphate          | ADP     | C00008 | 426.2   | 13.51 | 0.1  | 0.024 | 0.072 |
| Hydroxymethylglutaroyl-coenzyme A | HMG-CoA | C00356 | 910.15  | 18.36 | 0.1  | 0.014 | 0.071 |
| Inositol-1,4,5-triphosphate       | IP3     | C01245 | 418.737 | 17.74 | 0.1  | 0.055 | 0.085 |
| Oxoglutatione                     | GSSG    | C00127 | 611.6   | 9.09  | 0.05 | 0.013 | 0.071 |
| Adenosine triphosphate            | ATP     | C00002 | 506.2   | 16.04 | 0.05 | 0.018 | 0.071 |
| Uridine monophosphate             | UMP     | C00105 | 323.2   | 8.01  | 0.05 | 0.045 | 0.077 |
| Glucose-6-phosphate               | G6P     | C00668 | 259.1   | 5.98  | 0.05 | 0.043 | 0.077 |
| NADPH                             | NADPH   | C00005 | 744.4   | 16.49 | 0.05 | 0.019 | 0.071 |
| Cytidine-5'-diphosphate           | CDP     | C00112 | 402.2   | 13.15 | 0.05 | 0.054 | 0.085 |
| Cytidine-5'-triphosphate          | CTP     | C00063 | 482.2   | 15.80 | 0.05 | 0.027 | 0.074 |
| Nicotinamide adenine dinucleotide | NAD     | C00003 | 662.4   | 5.07  | 0.05 | 0.034 | 0.074 |



|                         |     |        |       |       |      |       |       |
|-------------------------|-----|--------|-------|-------|------|-------|-------|
| Uridine-5'-triphosphate | UTP | C00075 | 483.1 | 15.99 | 0.04 | 0.031 | 0.074 |
| Uridine-5'-diphosphate  | UDP | C00015 | 403.2 | 13.36 | 0.04 | 0.046 | 0.077 |

---

The analytes were identified by co-elution with authentic standards. The seeds were obtained from the plants, exposed during two days (at the seed maturation step) to the aqueous medium supplemented with 2.5% (w/v) PEG 8000 (stress, n = 5) in comparison to the seeds of the plants, treated with PEG-free medium (control, n = 5).

<sup>a</sup> the metabolite identical numbers of Kyoto Encyclopedia of Genes and Genomes (KEGG) database; <sup>b</sup> the  $m/z$  refers to compound-specific fragment ions, selected for quantification by peak areas at characteristic extracted ion chromatograms; <sup>c</sup> retention time ( $t_R$ , min); <sup>d</sup> fold change was calculated as abundance (peak areas at characteristic extracted ion chromatograms) ratio drought/control;  $t_R$ , retention time <sup>e</sup> and <sup>f</sup>  $p$  values calculated without (RAW  $p$ ) and with false discovery rate (FDR) correction by Benjamini-Hochberg method, respectively

**Table S1-3** Protein recoveries and total UV densities for individual pea protein samples separated by SDS-PAGE

| <b>Sample</b> | <b>Sample weight (g)</b> | <b>Protein concentration (mg/mL)</b> | <b>Protein recovery (mg/g fresh weight)</b> | <b>UV densities (AU)</b> |
|---------------|--------------------------|--------------------------------------|---------------------------------------------|--------------------------|
| Control-1     | 0.419                    | 31.4                                 | 89.9                                        | 34217                    |
| Control-2     | 0.398                    | 29.9                                 | 82.5                                        | 35147                    |
| Control-3     | 0.407                    | 26.6                                 | 78.4                                        | 35596                    |
| Control-4     | 0.420                    | 36.3                                 | 103.7                                       | 36079                    |
| Control-5     | 0.401                    | 27.4                                 | 95.6                                        | 36799                    |
| Stress-1      | 0.404                    | 34.3                                 | 106.1                                       | 37281                    |
| Stress-2      | 0.406                    | 44.8                                 | 110.3                                       | 37598                    |
| Stress-3      | 0.403                    | 30.9                                 | 103.4                                       | 39156                    |
| Stress-4      | 0.403                    | 44.4                                 | 104.6                                       | 39343                    |
| Stress-5      | 0.395                    | 39.3                                 | 104.4                                       | 39665                    |

Control and Stress denote the seeds of the control and subjected to two-day long drought pea plants (*Pisum sativum* L., cultivar SGE), respectively; AU, arbitrary units.

**Table S1-4** Proteins identified in the tryptic digests obtained from isolated and reference carboxypeptidase Y of yeast *Saccharomyces cerevisiae*.

| Sample                          | Accession number | Protein name                       | Coverage [%] | Number of Peptides | Number of Peptide-Spectrum Match | Number of Unique Peptides | Number of AAs | Score Sequest HT | Number of Peptides (by Search Engine) |
|---------------------------------|------------------|------------------------------------|--------------|--------------------|----------------------------------|---------------------------|---------------|------------------|---------------------------------------|
| Sigma-Aldrich C388 (upper band) | P00729           | Carboxypeptidase Y                 | 10,34        | 9                  | 14                               | 9                         | 532           | 22,37            | 9                                     |
|                                 | Q12306           | Ubiquitin-like protein SMT3        | 46,53        | 4                  | 5                                | 4                         | 101           | 18,83            | 4                                     |
|                                 | Q02724           | Ubiquitin-like-specific protease 1 | 9,50         | 5                  | 6                                | 5                         | 621           | 11,65            | 5                                     |
|                                 | P38805           | Ribosome production factor 1       | 5,42         | 2                  | 2                                | 2                         | 295           | 3,38             | 2                                     |
|                                 | Q02908           | Elongator complex protein 3        | 5,57         | 1                  | 1                                | 1                         | 557           | 2,43             | 1                                     |

|                                     |        |                                                |       |    |    |    |      |        |    |
|-------------------------------------|--------|------------------------------------------------|-------|----|----|----|------|--------|----|
|                                     | Q03281 | Inner nuclear<br>membrane protein<br>HEH2      | 3,92  | 1  | 2  | 1  | 663  | 2,19   | 1  |
|                                     | P32849 | DNA repair protein<br>RAD5                     | 0,77  | 1  | 1  | 1  | 1169 | 2,19   | 1  |
|                                     | P25335 | Allantoicase                                   | 3,79  | 1  | 1  | 1  | 343  | 2,12   | 1  |
|                                     | Q12180 | Halotolerance protein<br>9                     | 1,94  | 1  | 1  | 1  | 1030 | 2,06   | 1  |
|                                     | P43549 | Uncharacterized<br>membrane protein<br>YFL054C | 2,17  | 1  | 1  | 1  | 646  | 2,05   | 1  |
| <hr/>                               |        |                                                |       |    |    |    |      |        |    |
| Sigma-<br>Aldrich<br>C388<br>(lower | P00729 | Carboxypeptidase Y                             | 13,72 | 14 | 74 | 14 | 532  | 122,98 | 14 |

band)

|        |                                                           |       |   |   |   |      |       |   |
|--------|-----------------------------------------------------------|-------|---|---|---|------|-------|---|
| Q12306 | Ubiquitin-like protein<br>SMT3                            | 39,60 | 3 | 5 | 3 | 101  | 11,56 | 3 |
| P40395 | Guanine nucleotide<br>exchange factor<br>subunit RIC1     | 2,46  | 2 | 4 | 2 | 1056 | 5,41  | 2 |
| P41896 | Transcription initiation<br>factor IIF subunit beta       | 4,00  | 1 | 5 | 1 | 400  | 4,33  | 1 |
| P07806 | Valine--tRNA ligase,<br>mitochondrial                     | 1,36  | 1 | 2 | 1 | 1104 | 3,93  | 1 |
| P21372 | Pre-mRNA-processing<br>ATP-dependent RNA<br>helicase PRP5 | 3,89  | 2 | 2 | 2 | 849  | 3,66  | 2 |
| Q99383 | Nuclear<br>polyadenylated RNA-<br>binding protein 4       | 2,06  | 1 | 2 | 1 | 534  | 3,61  | 1 |

|                                           |        |                                                  |       |    |    |    |      |       |    |
|-------------------------------------------|--------|--------------------------------------------------|-------|----|----|----|------|-------|----|
|                                           | P47047 | ATP-dependent RNA<br>helicase DOB1               | 1,86  | 1  | 2  | 1  | 1073 | 3,58  | 1  |
|                                           | P39735 | Single-strand<br>annealing weakened<br>protein 1 | 3,07  | 1  | 2  | 1  | 261  | 2,32  | 1  |
|                                           | Q01846 | Structural protein<br>MDM1                       | 2,48  | 3  | 3  | 3  | 1127 | 2,22  | 3  |
| <hr/>                                     |        |                                                  |       |    |    |    |      |       |    |
|                                           | P00729 | Carboxypeptidase Y                               | 10,90 | 11 | 40 | 11 | 532  | 50,18 | 11 |
| Isolated<br>proteinase<br>(upper<br>band) | Q12306 | Ubiquitin-like protein<br>SMT3                   | 39,60 | 3  | 6  | 3  | 101  | 15,13 | 3  |
|                                           | Q02724 | Ubiquitin-like-specific<br>protease 1            | 3,06  | 2  | 2  | 2  | 621  | 3,08  | 2  |
| <hr/>                                     |        |                                                  |       |    |    |    |      |       |    |

|        |                                                       |      |   |   |   |      |      |   |
|--------|-------------------------------------------------------|------|---|---|---|------|------|---|
| P19358 | S-adenosylmethionine<br>synthase 2                    | 5,47 | 2 | 2 | 2 | 384  | 3,02 | 2 |
| P87275 | Altered inheritance of<br>mitochondria protein<br>11  | 6,57 | 1 | 2 | 1 | 137  | 2,43 | 1 |
| P38283 | Inner centromere<br>protein-related protein<br>SLI15  | 3,44 | 2 | 3 | 2 | 698  | 2,37 | 2 |
| P22137 | Clathrin heavy chain                                  | 0,97 | 1 | 1 | 1 | 1653 | 2,25 | 1 |
| P47037 | Structural maintenance<br>of chromosomes<br>protein 3 | 0,89 | 1 | 1 | 1 | 1230 | 2,14 | 1 |
| P21264 | Phosphoribosylaminoi<br>midazole carboxylase          | 1,40 | 1 | 1 | 1 | 571  | 2,13 | 1 |

|                                           |        |                                                     |       |    |    |    |      |       |    |
|-------------------------------------------|--------|-----------------------------------------------------|-------|----|----|----|------|-------|----|
|                                           | P08964 | Myosin-1                                            | 2,07  | 3  | 3  | 3  | 1928 | 2,13  | 3  |
|                                           | P07267 | Saccharopepsin                                      | 18,52 | 10 | 18 | 10 | 405  | 54,04 | 10 |
|                                           | Q12306 | Ubiquitin-like protein<br>SMT3                      | 46,53 | 4  | 6  | 4  | 101  | 16,71 | 4  |
| Isolated<br>proteinase<br>(lower<br>band) | P00729 | Carboxypeptidase Y                                  | 8,83  | 7  | 9  | 7  | 532  | 14,28 | 7  |
|                                           | P43562 | Probable metabolite<br>transport protein<br>YFL040W | 2,41  | 1  | 1  | 1  | 540  | 2,31  | 1  |
|                                           | P40302 | Proteasome subunit<br>alpha type-6                  | 7,26  | 1  | 1  | 1  | 234  | 2,27  | 1  |



|        |                                         |      |   |   |   |      |      |   |
|--------|-----------------------------------------|------|---|---|---|------|------|---|
| P38776 | Probable drug/proton<br>antiporter YHK8 | 1,95 | 1 | 1 | 1 | 514  | 2,12 | 1 |
| Q12691 | Sodium transport<br>ATPase 5            | 0,73 | 1 | 1 | 1 | 1091 | 1,98 | 1 |
| Q01896 | Sodium transport<br>ATPase 2            | 0,73 | 1 | 1 | 1 | 1091 | 1,98 | 1 |
| P13587 | Sodium transport<br>ATPase 1            | 0,73 | 1 | 1 | 1 | 1091 | 1,98 | 1 |
| P38853 | Kelch repeat-<br>containing protein 1   | 1,03 | 1 | 1 | 1 | 1164 | 1,93 | 1 |

---

**Table S1-5** The conditions of ultrahigh performance liquid chromatographic (UHPLC) separation and the settings for electrospray ionization-triple quadrupole-tandem mass spectrometry (ESI-QqQ-MS/MS) used for analysis of abscisic acid (ABA) in methanolic extracts of pea (*Pisum sativum* L., cultivar SGE) seeds with Waters ACQUITY UPLC H-Class UPLC System (Waters GmbH, Eschborn, Germany) coupled online to a hybrid triple quadrupole-linear ion trap mass spectrometer (QqLIT) AB Sciex QTRAP 6500 (AB Sciex, Darmstadt, Germany).

### Chromatography

| ACQUITY Sample Manager (SM)          |                                                                  |
|--------------------------------------|------------------------------------------------------------------|
| Injection mode                       | Partial Loop                                                     |
| Injection volume                     | 5 µL                                                             |
| Weak wash solvent                    | 0.3 mmol/L aq. ammonium formate                                  |
| Weak wash volume                     | 1200 µL                                                          |
| Strong wash solvent                  | Acetonitrile                                                     |
| Strong wash volume                   | 600 µL                                                           |
| Target sample temperature            | 5.0 C                                                            |
| Needle overfill flush                | Automatic                                                        |
| Column conditions                    |                                                                  |
| Separation column                    | EC 150/2 NUCLEOSHELL RP 18<br>(150 x 2 mm, particle size 2.7 µm) |
| Target column temperature            | 40.0 C                                                           |
| ACQUITY Binary Solvent Manager (BSM) |                                                                  |
| Eluent A                             | 0.3 mmol/L aq. ammonium formate                                  |
| Eluent B                             | Acetonitrile                                                     |

|                    |                                                                                                                                                                                                    |
|--------------------|----------------------------------------------------------------------------------------------------------------------------------------------------------------------------------------------------|
| Seal wash duration | 5 min                                                                                                                                                                                              |
| Flow rate          | 0.4 mL/min                                                                                                                                                                                         |
| Elution program    | 5% eluent B isocratic – 2 min<br>gradient to 95% eluent B – 5.5 min<br>95% eluent B isocratic – 2 min<br>gradient to 5% eluent B – 0.01 min<br>5% eluent B isocratic – 1.99 min (re-equilibration) |

---

### Mass spectrometry

---

#### General

---

|                           |                                                  |
|---------------------------|--------------------------------------------------|
| Mass analyzer type        | triple quadrupole-linear ion trap (QqLIT, QTRAP) |
| Ion source                | Turbo Ion Spray <sup>®</sup>                     |
| Experiment type           | multiple reaction monitoring (MRM)               |
| Operatinon mode           | negative                                         |
| Cycle time (ms)           | 950                                              |
| Pause between ranges (ms) | 5.007                                            |
| Settling time (s)         | 0                                                |
| Duration                  | 11 min                                           |

---

#### Ion source settings

---

|                             |      |
|-----------------------------|------|
| Nebulizer gas (psig)        | 60   |
| Drying gas (psig)           | 70   |
| Curtain gas (psig)          | 40   |
| Ion spray voltage (kV)      | -4.5 |
| Ion source temperature (°C) | 450  |

---

| MS/MS Setting                  |                                     |
|--------------------------------|-------------------------------------|
| Fragmentation mode             | CAD                                 |
| MS/MS experiment type          | MRM                                 |
| Collision gas                  | nitrogen                            |
| Collision gas pressure         | 3 psig (medium)                     |
| Entrance potential (V)         | -10.0                               |
| Scheduled MRM                  | enabled                             |
| Scheduled MRM type             | basic                               |
| MRM detection window (s)       | 500                                 |
| Target scan time (s)           | 1                                   |
| Dwell time                     | adjusted by scheduled MRM algorithm |
| Q1 resolution                  | unit                                |
| Q3 resolution                  | unit                                |
| Declustering potential (DP, V) | compound-specific                   |
| Collision potential (CE, V)    | compound-specific                   |
| Exit potential (CXP, V)        | compound-specific                   |

#### Analyte-specific settings

| Analyte-specific combinations of Q1 and Q3 <i>m/z</i> ranges (transitions) |                         |                      |                      |           |        |            |
|----------------------------------------------------------------------------|-------------------------|----------------------|----------------------|-----------|--------|------------|
| Analyte                                                                    | t <sub>R</sub><br>(min) | Q1<br>( <i>m/z</i> ) | Q3<br>( <i>m/z</i> ) | DP<br>(V) | CE (V) | CXP<br>(V) |
| abscisic acid 01                                                           | 4.8                     | 263.0                | 152.9                | -20.0     | -16.0  | -9.0       |
| abscisic acid 02                                                           | 4.8                     | 263.0                | 219.0                | -20.0     | -18.0  | -13.0      |
| (d6) abscisic acid 01                                                      | 4.8                     | 269.0                | 159.0                | -20.0     | -16.0  | -9.0       |
| (d6) abscisic acid 02                                                      | 4.8                     | 269.0                | 225.0                | -20.0     | -18.0  | -13.0      |

**Table S1-6** Gas chromatographic (GC) separation conditions and electron ionization-quadrupole-mass spectrometry (EI-Q-MS) settings for analysis of *Pisum sativum* L. primary thermally stabile metabolites with Shimadzu GC2010 gas chromatograph coupled online to a quadrupole mass selective detector Shimadzu GCMS QP2010 with CTC GC PAL Liquid Injector (Shimadzu Scientific Instruments, Australia)

| Parameters                             | Setting                                                                                                      |
|----------------------------------------|--------------------------------------------------------------------------------------------------------------|
| GC settings                            |                                                                                                              |
| Separation column                      | HP-5 capillary column (30 m × 0.25 mm ID, 0.25 µm film thickness, Thermo Fisher Scientific, Bremen, Germany) |
| Carrier gas /<br>carrier gas flow rate | Helium/1 mL/min                                                                                              |
| Injector operation<br>mode             | Splitless mode<br>(90 s splitless time)                                                                      |
| Injector temperature                   | 250°C                                                                                                        |
| Temperature program                    | 1 min at 40°C<br>ramp 15°C/min to 70°C<br>1 min at 70°C<br>ramp 6°C/min to 320°C<br>10 min at 320°C          |
| Parameters                             | MS settings                                                                                                  |
| Ionization mode                        | Electron ionization (EI)                                                                                     |
| Electron energy                        | 70 eV                                                                                                        |
| Operation mode                         | Positive, scanning at 0.34 sec scan <sup>-1</sup>                                                            |
| <i>m/z</i> range                       | 50 - 550                                                                                                     |

**Table S1-7** The conditions of ion pair-reversed phase ultrahigh performance liquid chromatographic (IP-RP-UHPLC) separation and the settings for electrospray ionization-triple quadrupole-tandem mass spectrometry (ESI-QqQ-MS/MS) used for analysis of *Pisum sativum* L. anionic primary thermo labile metabolites with Waters ACQUITY UPLC H-Class UPLC System (Waters GmbH, Eschborn, Germany) coupled online to a hybrid triple quadrupole-linear ion trap mass spectrometer (QqLIT) AB Sciex QTRAP 6500 (AB Sciex, Darmstadt, Germany).

### Chromatography

| ACQUITY Sample Manager (SM)          |                                                                  |
|--------------------------------------|------------------------------------------------------------------|
| Injection mode                       | PartialLoop                                                      |
| Injection volume                     | 5 µL                                                             |
| Weak wash solvent                    | 0.3 mmol/L aq. ammonium formate                                  |
| Weak wash volume                     | 800 µL                                                           |
| Strong wash solvent                  | Acetonitrile                                                     |
| Strong wash volume                   | 400 µL                                                           |
| Target sample temperature            | 4.0 C                                                            |
| Needle overfill flush                | Automatic                                                        |
| Column conditions                    |                                                                  |
| Separation column                    | EC 150/2 NUCLEOSHELL RP 18<br>(150 x 2 mm, particle size 2.7 µm) |
| Target column temperature            | 40.0 C                                                           |
| ACQUITY Binary Solvent Manager (BSM) |                                                                  |

|                    |                                                                                                                                                                                                                                       |
|--------------------|---------------------------------------------------------------------------------------------------------------------------------------------------------------------------------------------------------------------------------------|
| Eluent A           | 0.3 mmol/L aq. ammonium formate                                                                                                                                                                                                       |
| Eluent B           | Acetonitrile                                                                                                                                                                                                                          |
| Seal wash duration | 5 min                                                                                                                                                                                                                                 |
| Flow rate          | 0.4 mL/min                                                                                                                                                                                                                            |
| Elution program    | 2% eluent B isocratic - 2 min<br>gradient to 36% eluent B – 16 min<br>gradient to 95% eluent B – 3 min<br>95% eluent B isocratic – 1.5 min<br>gradient to 2% eluent B – 0.1 min<br>2% eluent B isocratic – 2.4 min (re-equilibration) |

### Mass spectrometry

| General                   |                                                                        |
|---------------------------|------------------------------------------------------------------------|
| Mass analyzer type        | triple quadrupole-linear ion trap (QqLIT, QTRAP, operated in QqQ mode) |
| Ion source                | TurboIonSpray <sup>®</sup>                                             |
| Experiment type           | multiple reaction monitoring (MRM)                                     |
| Operation mode            | negative                                                               |
| Cycle time (s)            | 1.1                                                                    |
| Pause between ranges (ms) | 5.007                                                                  |
| Settling time (s)         | 0                                                                      |
| Duration                  | 24 min                                                                 |
| Ion source settings       |                                                                        |
| Nebulizer gas (psig)      | 60                                                                     |
| Drying gas (psig)         | 70                                                                     |

|                                |                                     |
|--------------------------------|-------------------------------------|
| Curtain gas (psig)             | 40                                  |
| Ion spray voltage (kV)         | -4.5                                |
| Ion source temperature (°C)    | 450                                 |
| <b>MS/MS settings</b>          |                                     |
| Fragmentation mode             | CAD                                 |
| MS/MS experiment type          | MRM                                 |
| Collision gas                  | nitrogen                            |
| Collision gas pressure         | 3 psig (medium)                     |
| Entrance potential (V)         | -10.0                               |
| Scheduled MRM                  | enabled                             |
| Scheduled MRM type             | basic                               |
| MRM detection window (s)       | 500                                 |
| Target scan time (s)           | 1                                   |
| Dwell time                     | adjusted by scheduled MRM algorithm |
| Q1 resolution                  | unit                                |
| Q3 resolution                  | unit                                |
| Declustering potential (DP, V) | compound-specific (listed below)    |
| Collision potential (CE, V)    | compound-specific (listed below)    |
| Exit potential (CXP, V)        | compound-specific (listed below)    |

### Analyte-specific settings

| Analyte-specific combinations of Q1 and Q3 <i>m/z</i> ranges (transitions) |                           |                         |                      |                      |           |           |            |
|----------------------------------------------------------------------------|---------------------------|-------------------------|----------------------|----------------------|-----------|-----------|------------|
| #                                                                          | Analyte                   | t <sub>R</sub><br>(min) | Q1<br>( <i>m/z</i> ) | Q3<br>( <i>m/z</i> ) | DP<br>(V) | CE<br>(V) | CXP<br>(V) |
| 1                                                                          | 3-dehydroxyshikimic acid  | 0.0                     | 171.0                | 127.0                | -25.0     | -16.0     | -15.0      |
| 2                                                                          | 5-methyl-tetrahydrofolate | 0.0                     | 453.872              | 241.7                | -20.0     | -30.0     | -15        |
| 3                                                                          | allantoin                 | 0.0                     | 156.96               | 97.2                 | -60       | -16       | -1         |



|           |                                                     |     |         |       |      |      |     |
|-----------|-----------------------------------------------------|-----|---------|-------|------|------|-----|
| <b>4</b>  | 3-ureidopropionic acid                              | 0.0 | 130.9   | 87.9  | -10  | -14  | -13 |
| <b>5</b>  | 4-diphosphocytidyl-2-C-methyl- <i>D</i> -erythritol | 0.0 | 520.1   | 78.9  | -120 | -108 | -9  |
| <b>6</b>  | dehydroascorbic acid                                | 0.0 | 173     | 127   | -15  | -18  | -17 |
| <b>7</b>  | 2-deoxyribose 5-phosphate                           | 0.0 | 212.947 | 97.1  | -40  | -20  | -19 |
| <b>8</b>  | flavin mononucleotide                               | 0.0 | 498.814 | 480.9 | -35  | -18  | -29 |
| <b>9</b>  | guanine                                             | 0.0 | 150.907 | 135.8 | -10  | -18  | -9  |
| <b>10</b> | $\gamma$ -aminobutyric acid                         | 0.0 | 100.944 | 56.9  | -5   | -12  | -5  |
| <b>11</b> | 3-hydroxy-3-methylglutaric acid                     | 0.0 | 161     | 99    | -50  | -35  | -13 |
| <b>12</b> | 3-hydroxy-3-methylglutaric acid                     | 0.0 | 161     | 57    | -50  | -45  | -13 |
| <b>13</b> | nicotinic acid ribonucleotide                       | 0.0 | 333.885 | 289.9 | -25  | -16  | -13 |
| <b>14</b> | nicotinamide                                        | 0.0 | 120.933 | 76.9  | -40  | -16  | -9  |
| <b>15</b> | nicotinic acid                                      | 0.0 | 121.907 | 77.9  | -55  | -16  | -13 |
| <b>16</b> | beta-Nicotinamide mononucleotide                    | 0.0 | 334.973 | 204.9 | -50  | -30  | -13 |
| <b>17</b> | quinic acid                                         | 0.0 | 190.932 | 85    | -50  | -28  | -13 |
| <b>18</b> | shikimic acid                                       | 0.0 | 172.892 | 92.9  | -15  | -20  | -5  |
| <b>19</b> | galactose-uridine-5'-diphosphate                    | 0.0 | 564.805 | 322.8 | -160 | -32  | -21 |
| <b>20</b> | uridine-diphosphate- <i>N</i> -acetylglucosamine    | 0.0 | 605.754 | 384.8 | -175 | -36  | -25 |
| <b>21</b> | xanthopterin                                        | 0.0 | 178.833 | 107   | -5   | -12  | -3  |
| <b>22</b> | alanine                                             | 1.6 | 148     | 88.1  | -20  | -8   | -3  |
| <b>23</b> | arginine                                            | 1.6 | 173.2   | 131   | -50  | -18  | -7  |
| <b>24</b> | asparagine                                          | 1.6 | 131.1   | 87.1  | -75  | -16  | -11 |
| <b>25</b> | levocarnitine                                       | 1.6 | 220.2   | 145.9 | -35  | -12  | -7  |
| <b>26</b> | citrulline                                          | 1.6 | 174.2   | 131   | -35  | -18  | -7  |
| <b>27</b> | creatine                                            | 1.6 | 130.1   | 88.1  | -25  | -14  | -5  |
| <b>28</b> | cysteine/cystine                                    | 1.6 | 239.3   | 120   | -40  | -32  | -1  |
| <b>29</b> | glutamine                                           | 1.6 | 145.1   | 108.9 | -30  | -18  | -5  |
| <b>30</b> | glucose                                             | 1.6 | 178.9   | 89    | -50  | -12  | -13 |
| <b>31</b> | glycine                                             | 1.6 | 74.1    | 74    | -36  | -13  | -3  |
| <b>32</b> | lysine                                              | 1.6 | 145.2   | 101   | -65  | -14  | -5  |
| <b>33</b> | proline                                             | 1.6 | 114.1   | 86    | -55  | -18  | -3  |

|           |                                    |      |       |        |      |     |     |
|-----------|------------------------------------|------|-------|--------|------|-----|-----|
| <b>34</b> | serine                             | 1.6  | 104.1 | 74     | -20  | -16 | -3  |
| <b>35</b> | threonine                          | 1.6  | 118.1 | 73.9   | -25  | -18 | -3  |
| <b>36</b> | ornithine                          | 1.7  | 131.2 | 82.9   | -60  | -20 | -5  |
| <b>37</b> | sucrose                            | 1.7  | 341.1 | 89.01  | -240 | -38 | -13 |
| <b>38</b> | valine                             | 1.7  | 233.3 | 116    | -25  | -10 | -5  |
| <b>39</b> | cytidine                           | 1.8  | 242.2 | 108.86 | -70  | -18 | -5  |
| <b>40</b> | histidine                          | 1.8  | 154.2 | 93     | -40  | -24 | -3  |
| <b>41</b> | methionine                         | 1.8  | 148.2 | 47     | -45  | -24 | -5  |
| <b>42</b> | aspartic acid                      | 1.85 | 132   | 88     | -40  | -18 | -13 |
| <b>43</b> | leucine + isoleucine               | 1.9  | 261.3 | 130.2  | -30  | -10 | -1  |
| <b>44</b> | tyrosine                           | 1.9  | 180.2 | 118.9  | -60  | -24 | -5  |
| <b>45</b> | uridine                            | 1.9  | 243.2 | 109.88 | -65  | -22 | -5  |
| <b>46</b> | glucosamine 6-phosphate            | 2.1  | 258.2 | 97     | -45  | -24 | -5  |
| <b>47</b> | glutamic acid                      | 2.1  | 146   | 102    | -80  | -18 | -9  |
| <b>48</b> | guanosine                          | 2.1  | 282.2 | 149.93 | -80  | -26 | -7  |
| <b>49</b> | phosphocholine                     | 2.3  | 242.2 | 167.9  | -40  | -12 | -9  |
| <b>50</b> | phenylalanine                      | 2.4  | 164.2 | 103    | -55  | -24 | -5  |
| <b>51</b> | S-adenosyl- <i>L</i> -homocysteine | 2.5  | 383.4 | 133.9  | -80  | -36 | -7  |
| <b>52</b> | adenosine                          | 2.7  | 266.2 | 133.86 | -70  | -12 | -1  |
| <b>53</b> | argininosuccinic acid              | 2.7  | 289.3 | 271.3  | -55  | -14 | -15 |
| <b>54</b> | glucosamine 1-phosphate            | 2.7  | 258.2 | 78.9   | -55  | -42 | -1  |
| <b>55</b> | ascorbic acid                      | 3.2  | 175   | 115    | -25  | -25 | -5  |
| <b>56</b> | tryptophan                         | 3.5  | 203.2 | 116.2  | -50  | -22 | -7  |
| <b>57</b> | dihydroorotic acid                 | 3.8  | 157.1 | 112.7  | -40  | -10 | -5  |
| <b>58</b> | lactic acid                        | 3.8  | 89.1  | 42.9   | -15  | -12 | -5  |
| <b>59</b> | phosphate                          | 4.6  | 96.9  | 78.9   | -40  | -18 | -15 |
| <b>60</b> | glutathione                        | 4.7  | 306.3 | 143    | -5   | -26 | -7  |
| <b>61</b> | orotic acid                        | 4.8  | 155.1 | 110.7  | -25  | -12 | -5  |
| <b>62</b> | pyruvic acid                       | 4.9  | 87.1  | 43     | -30  | -12 | -1  |
| <b>63</b> | mevalonic acid lactone             | 5.1  | 147.2 | 59.1   | -45  | -20 | -7  |
| <b>64</b> | nicotinamide adenine dinucleotide  | 5.5  | 662.4 | 540.1  | -45  | -22 | -15 |

|           |                                           |      |         |       |      |     |     |
|-----------|-------------------------------------------|------|---------|-------|------|-----|-----|
| <b>65</b> | glucose 6-phosphate                       | 5.9  | 259.1   | 97    | -65  | -18 | -13 |
| <b>66</b> | erythrose 4-phosphate                     | 6.09 | 199.1   | 96.8  | -40  | -12 | -5  |
| <b>67</b> | 2-deoxyribose 5-phosphate                 | 6.1  | 229.1   | 96.81 | -35  | -20 | -5  |
| <b>68</b> | fructose 6-phosphate                      | 6.3  | 259.1   | 96.9  | -30  | -20 | -11 |
| <b>69</b> | glycerophosphoric acid                    | 6.3  | 171.1   | 78.8  | -45  | -24 | -1  |
| <b>70</b> | sedoheptulose 7-phosphate                 | 6.3  | 289.2   | 97    | -50  | -22 | -5  |
| <b>71</b> | cyclic guanosine monophosphate            | 6.4  | 344.2   | 150   | -70  | -34 | -11 |
| <b>72</b> | glyceraldehyde 3-phosphate                | 6.5  | 169     | 97.01 | -30  | -12 | -5  |
| <b>73</b> | glucose-1-phosphate                       | 6.7  | 259.1   | 240.8 | -30  | -16 | -15 |
| <b>74</b> | 2-C-methylerythritol 4-phosphate          | 6.86 | 215     | 78.9  | -40  | -56 | -9  |
| <b>75</b> | cytidine monophosphate                    | 7    | 322.2   | 79    | -65  | -68 | -5  |
| <b>76</b> | pantothenic acid                          | 7    | 218.2   | 88.1  | -55  | -18 | -5  |
| <b>77</b> | adenosine 3',5'-cyclic mono-phosphate     | 7.6  | 328.2   | 133.9 | -125 | -36 | -5  |
| <b>78</b> | ribulose-5-phosphate/xylulose-5-phosphate | 7.6  | 229.1   | 96.8  | -45  | -18 | -15 |
| <b>79</b> | ribose-1-phosphate                        | 7.7  | 229.1   | 211   | -50  | -14 | -3  |
| <b>80</b> | guanosine 5'-monophosphate                | 7.8  | 362.2   | 78.92 | -65  | -66 | -5  |
| <b>81</b> | uridine monophosphate                     | 7.8  | 323.2   | 79    | -65  | -68 | -5  |
| <b>82</b> | 5-amino-4-imidazolecarboxamide ribotide   | 8.1  | 337.2   | 79.1  | -85  | -50 | -5  |
| <b>83</b> | inosinic acid                             | 8.1  | 347.2   | 134.8 | -70  | -38 | -7  |
| <b>84</b> | 2'-deoxyguanosine 5'-monophosphate        | 8.4  | 346.2   | 78.81 | -80  | -42 | -3  |
| <b>85</b> | dihydroxyacetone phosphate                | 8.47 | 169.1   | 97    | -35  | -14 | -11 |
| <b>86</b> | 1-deoxy- <i>D</i> -xylulose 5-phosphate   | 8.6  | 213.129 | 97    | -50  | -18 | -1  |
| <b>87</b> | thymidine-5'-phosphate                    | 8.7  | 321.2   | 78.81 | -65  | -58 | -3  |
| <b>88</b> | adenosine monophosphate                   | 8.9  | 346.2   | 78.82 | -70  | -52 | -3  |
| <b>89</b> | glutathione disulfide                     | 9.5  | 611.6   | 306.1 | -35  | -34 | -7  |
| <b>90</b> | phosphocreatine                           | 9.6  | 210.1   | 78.9  | -35  | -22 | -1  |
| <b>91</b> | malate                                    | 9.9  | 133.1   | 115   | -20  | -16 | -5  |
| <b>92</b> | succinic acid                             | 9.9  | 117.11  | 73    | -25  | -16 | -7  |
| <b>93</b> | adenosine diphosphoribose                 | 10   | 557.94  | 346   | -170 | -34 | -19 |

|            |                                                      |       |         |       |      |      |     |
|------------|------------------------------------------------------|-------|---------|-------|------|------|-----|
| <b>94</b>  | ureidosuccinic acid                                  | 10    | 175.1   | 131.8 | -25  | -16  | -7  |
| <b>95</b>  | adenosine diphosphate glucose                        | 10.2  | 587.864 | 345.9 | -140 | -32  | -19 |
| <b>96</b>  | sulfate                                              | 10.2  | 97      | 97    | -40  | -18  | -15 |
| <b>97</b>  | uridine-5'-diphosphate-glucose                       | 10.2  | 565.3   | 323   | -125 | -36  | -11 |
| <b>98</b>  | fumaric acid                                         | 10.6  | 115.101 | 71    | -5   | -12  | -13 |
| <b>99</b>  | $\alpha$ -ketoglutaric acid                          | 10.7  | 145.01  | 101   | -10  | -12  | -13 |
| <b>100</b> | 2C-methyl- <i>D</i> -erythritol 2,4-cyclodiphosphate | 10.9  | 277     | 79    | -45  | -64  | -37 |
| <b>101</b> | 1,4-dihydronicotinamide adenine dinucleotide         | 11.4  | 664.4   | 78.9  | -100 | -124 | -1  |
| <b>102</b> | (R)-5-phosphomevalonic acid                          | 12.6  | 227.1   | 97    | -30  | -35  | -10 |
| <b>103</b> | cytidine-5'-diphosphate                              | 12.8  | 402.2   | 78.87 | -65  | -70  | -5  |
| <b>104</b> | 2-phosphoglyceric acid                               | 12.9  | 185     | 79.01 | -25  | -20  | -35 |
| <b>105</b> | guanosine-5'-diphosphate                             | 12.9  | 442.2   | 78.85 | -85  | -70  | -3  |
| <b>106</b> | xanthosine-5'-phosphate                              | 12.9  | 363.2   | 151.1 | -60  | -36  | -5  |
| <b>107</b> | 6-phosphogluconic acid                               | 13.1  | 275     | 79    | -60  | -66  | -5  |
| <b>108</b> | thymidine-5'-diphosphate                             | 13.1  | 401.2   | 78.81 | -70  | -68  | -3  |
| <b>109</b> | uridine-5'-diphosphate                               | 13.1  | 403.2   | 78.79 | -75  | -68  | -3  |
| <b>110</b> | 3-phosphoglyceric acid                               | 13.2  | 185.1   | 96.7  | -30  | -22  | -7  |
| <b>111</b> | adenosine-5'-diphosphate                             | 13.2  | 426.2   | 78.85 | -75  | -66  | -3  |
| <b>112</b> | 2'-deoxyadenosine-5'-diphosphate                     | 13.3  | 410.2   | 78.88 | -60  | -76  | -3  |
| <b>113</b> | (2E)-4-hydroxy-3-methylbut-2-en-1-yl diphosphate     | 13.3  | 261     | 79    | -40  | -52  | -9  |
| <b>114</b> | aconitic acid                                        | 13.4  | 172.866 | 128.7 | -25  | -10  | -55 |
| <b>115</b> | flavin adenine dinucleotide                          | 13.4  | 784.5   | 79    | -60  | -130 | -1  |
| <b>116</b> | nicotinamide adenine dinucleotide phosphate          | 13.4  | 742.4   | 620   | -55  | -22  | -17 |
| <b>117</b> | phosphoenolpyruvic acid                              | 13.86 | 167     | 78.8  | -20  | -16  | -9  |
| <b>118</b> | citric acid                                          | 14.1  | 191     | 87    | -35  | -22  | -15 |
| <b>119</b> | isocitric acid                                       | 14.39 | 191.1   | 73    | -45  | -28  | -31 |
| <b>120</b> | 3'-dephospho coenzyme A                              | 14.5  | 686.6   | 78.8  | -105 | -112 | -1  |
| <b>121</b> | isopentenyl pyrophosphate                            | 14.6  | 245.03  | 78.9  | -15  | -44  | -37 |
| <b>122</b> | orotidine 5'-monophosphate                           | 14.9  | 390.2   | 78.9  | -50  | -78  | -1  |

|            |                                                                 |      |         |        |      |      |     |
|------------|-----------------------------------------------------------------|------|---------|--------|------|------|-----|
| <b>123</b> | fructose-1,6-diphosphate                                        | 15.1 | 339.1   | 96.9   | -35  | -22  | -11 |
| <b>124</b> | cytidine 5'-triphosphate                                        | 15.4 | 482.2   | 158.83 | -85  | -36  | -9  |
| <b>125</b> | deoxythymidine 5'-triphosphate                                  | 15.4 | 481.2   | 158.71 | -80  | -38  | -9  |
| <b>126</b> | guanosine-5'-triphosphate                                       | 15.4 | 522.2   | 158.79 | -90  | -48  | -9  |
| <b>127</b> | uridine-5'-triphosphate                                         | 15.5 | 483.1   | 158.76 | -90  | -38  | -9  |
| <b>128</b> | adenosine triphosphate                                          | 15.6 | 506.2   | 158.78 | -80  | -38  | -9  |
| <b>129</b> | ribulose-1,5-bisphosphate                                       | 15.7 | 309.1   | 97     | -35  | -20  | -27 |
| <b>130</b> | adenylosuccinic acid                                            | 15.8 | 462.3   | 133.9  | -85  | -62  | -7  |
| <b>131</b> | mevalonate-5-diphosphate                                        | 15.9 | 307     | 78.9   | -25  | -35  | -13 |
| <b>132</b> | 4-diphosphocytidyl-2-C-methyl- <i>D</i> -erythritol 2-phosphate | 16   | 600     | 78.9   | -115 | -126 | -19 |
| <b>133</b> | sedoheptulose-7-phosphate                                       | 16   | 369     | 97     | -35  | -20  | -27 |
| <b>134</b> | dihydronicotinamide adenine dinucleotide phosphate              | 16.3 | 744.4   | 79     | -110 | -118 | -3  |
| <b>135</b> | coenzyme A                                                      | 16.8 | 766.5   | 78.9   | -40  | -122 | -1  |
| <b>136</b> | 5-phosphoribosyl diphosphate                                    | 16.8 | 389.1   | 176.8  | -55  | -28  | -9  |
| <b>137</b> | inositol triphosphate                                           | 17.4 | 418.737 | 320.8  | -25  | -28  | -21 |
| <b>138</b> | acetoacetyl coenzyme A                                          | 17.5 | 424.8   | 382.6  | -50  | -12  | -11 |
| <b>139</b> | coenzyme A                                                      | 17.5 | 765.8   | 407.9  | -245 | -50  | -19 |
| <b>140</b> | propionyl-CoA                                                   | 17.6 | 822.6   | 78.8   | -120 | -130 | -13 |
| <b>141</b> | S-acetyl coenzyme A                                             | 17.7 | 807.9   | 407.9  | -220 | -52  | -27 |
| <b>142</b> | methylmalonyl coenzyme A                                        | 17.8 | 432.8   | 410.6  | -25  | -8   | -13 |
| <b>143</b> | butanoyl coenzyme A                                             | 17.9 | 417.8   | 78.84  | -50  | -74  | -3  |
| <b>144</b> | geranyl diphosphate                                             | 18   | 313.2   | 78.9   | -65  | -46  | -1  |
| <b>145</b> | inositol-1,3,4,5-tetraphosphate                                 | 18.2 | 498.704 | 400.7  | -100 | -30  | -27 |
| <b>146</b> | malonyl coenzyme A                                              | 18.6 | 851.9   | 408    | -20  | -8   | -11 |
| <b>147</b> | malonyl coenzyme A                                              | 18.6 | 851.9   | 807.9  | -185 | -36  | -37 |
| <b>148</b> | succinyl coenzyme A                                             | 18.6 | 866     | 407.6  | -260 | -56  | -25 |
| <b>149</b> | $\beta$ -methylcrotonyl coenzyme A                              | 19.1 | 847.9   | 407.8  | -240 | -58  | -23 |
| <b>150</b> | hydroxymethylglutaroyl coenzyme A                               | 19.1 | 454.8   | 382.6  | -50  | -18  | -9  |
| <b>151</b> | 1-diphosinositol pentakisphosphate                              | 19.2 | 578.755 | 480.6  | -25  | -32  | -31 |

|            |                              |      |         |       |      |     |     |
|------------|------------------------------|------|---------|-------|------|-----|-----|
| <b>152</b> | isovaleryl coenzyme A        | 19.2 | 849.9   | 407.9 | -240 | -58 | -19 |
| <b>153</b> | geranylgeranyl pyrophosphate | 19.6 | 449.069 | 78.8  | -65  | -68 | -35 |
| <b>154</b> | Phytic acid                  | 19.8 | 658.555 | 560.7 | -145 | -38 | -31 |
| <b>155</b> | geranylfarnesyl diphosphate  | 20.4 | 517.188 | 78.8  | -45  | -84 | -19 |
| <b>156</b> | ent-copal-8-ol diphosphate   | 21   | 467.18  | 78.8  | -240 | -38 | -13 |
| <b>157</b> | farnesyl diphosphate         | 21.2 | 381.3   | 78.9  | -50  | -50 | -5  |

**Table S1-8** The conditions of ultrahigh performance liquid chromatographic (UHPLC) separation and the settings for electrospray ionization-quadrupole-time of flight mass spectrometry (ESI-QqTOF-MS) applied for the analysis of *Pisum sativum* L. semi-polar secondary metabolites with Waters ACQUITY UPLC I-Class UPLC System (Waters GmbH, Eschborn, Germany) coupled online to a hybrid quadrupole-time of flight mass spectrometer (QqTOF-MS) AB Sciex TripleTOF 6600 (AB Sciex, Darmstadt, Germany).

### Chromatography

| ACQUITY Sample Manager (SM) |                                 |
|-----------------------------|---------------------------------|
| Injection mode              | Partial Loop                    |
| Injection volume            | 5 µL                            |
| Weak wash solvent           | 0.3 mmol/L aq. ammonium formate |
| Weak wash volume            | 800 µL                          |
| Strong wash solvent         | acetonitrile                    |
| Strong wash volume          | 400 µL                          |
| Target sample temperature   | 4.0 C                           |
| Needle overfill flush       | automatic                       |
| Column conditions           |                                 |

|                           |                                                                  |
|---------------------------|------------------------------------------------------------------|
| Separation column         | EC 150/2 NUCLEOSHELL RP 18<br>(150 x 2 mm, particle size 2.7 µm) |
| Target column temperature | 40.0 C                                                           |

---

### ACQUITY Binary Solvent Manager (BSM)

---

|                    |                                                                                                                                                                                               |
|--------------------|-----------------------------------------------------------------------------------------------------------------------------------------------------------------------------------------------|
| Eluent A           | 0.3 mmol/L aq. ammonium formate                                                                                                                                                               |
| Eluent B           | acetonitrile                                                                                                                                                                                  |
| Seal wash duration | 5 min                                                                                                                                                                                         |
| Flow rate          | 0.4 mL/min                                                                                                                                                                                    |
| Elution program    | 5% eluent B isocratic - 2 min<br>gradient to 95% eluent B – 17 min<br>95% eluent B isocratic – 2 min<br>gradient to 5% eluent B – 0.1 min<br>5% eluent B isocratic – 3 min (re-equilibration) |

---

### Mass spectrometry

---

#### General

---

|                           |                                                                                         |
|---------------------------|-----------------------------------------------------------------------------------------|
| Mass analyzer type        | quadrupole-time of flight (QqTOF-MS)                                                    |
| Ionsource                 | DuoSpray™ ion source                                                                    |
| Experiment type           | Sequential Windowed Acquisition of All Theoretical<br>Fragment Ion Mass Spectra (SWATH) |
| Operatinon mode           | positive/negative                                                                       |
| Cycle time (s)            | 1.1                                                                                     |
| Pause between ranges (ms) | 1.049                                                                                   |
| Auto adjust with mass     | on                                                                                      |

|                   |        |
|-------------------|--------|
| Settling time (s) | 0      |
| Time bins to sum  | 4      |
| Duration          | 23 min |

---

#### Ion source settings

---

|                             |                                   |
|-----------------------------|-----------------------------------|
| Nebulizer gas (psig)        | 60                                |
| Drying gas (psig)           | 70                                |
| Curtain gas (psig)          | 55                                |
| Ion spray voltage (kV)      | 5.5/-4.5 (positive/negative mode) |
| Ion source temperature (°C) | 450                               |

---

#### MS settings

---

|                            |                                 |
|----------------------------|---------------------------------|
| Experiment type            | TOF-MS                          |
| <i>m/z</i> range           | 65 - 1250                       |
| Accumulation time (ms)     | 100                             |
| Declustering potential (V) | 35/-35 (positive/negative mode) |
| Collision potential (V)    | 10/-10 (positive/negative mode) |

---

#### MS/MS Setting

---

|                                     |                                                     |
|-------------------------------------|-----------------------------------------------------|
| Fragmentation mode                  | collision-activated dissociation (CAD) <sup>3</sup> |
| MS/MS experiment type               | SWATH                                               |
| SWATH window number                 | 48                                                  |
| SWATH window width ( <i>m/z</i> )   | 26                                                  |
| SWATH window overlap ( <i>m/z</i> ) | 1                                                   |
| Rolling collision energy            | off                                                 |
| Analyte type                        | small molecules                                     |
| Accumulation time (ms)              | 20                                                  |
| Declustering potential (V)          | 35/-35 (positive/negative mode)                     |



|                             |                                 |
|-----------------------------|---------------------------------|
| Collision potential (V)     | 45/-35 (positive/negative mode) |
| Collision energy spread (V) | 35/15 (positive/negative mode)  |
| Ion release delay (V)       | 30/-30 (positive/negative mode) |
| Ion release width (V)       | 15/-15 (positive/negative mode) |

---

**Table S1-9** Composition of the alkane mixture used for determination of Kovats retention time indices (RIs)

| Alkane name          | Elemental composition           | RI   | Ref. <i>m/z</i> | <i>t<sub>R</sub></i> (min) |
|----------------------|---------------------------------|------|-----------------|----------------------------|
| Dodecane             | C <sub>12</sub> H <sub>26</sub> | 1200 | 170             | 12.71                      |
| Tridecane            | C <sub>13</sub> H <sub>28</sub> | 1300 | 184             | 15.025                     |
| Tetradecane          | C <sub>14</sub> H <sub>30</sub> | 1400 | 198             | 17.252                     |
| Pentadecane          | C <sub>15</sub> H <sub>32</sub> | 1500 | 212             | 19.349                     |
| Hexadecane           | C <sub>16</sub> H <sub>34</sub> | 1600 | 226             | 21.335                     |
| Heptadecane          | C <sub>17</sub> H <sub>36</sub> | 1700 | 240             | 23.217                     |
| Octadecane           | C <sub>18</sub> H <sub>38</sub> | 1800 | 254             | 25.002                     |
| Nonadecane           | C <sub>19</sub> H <sub>40</sub> | 1900 | 268             | 26.709                     |
| Eicosane (= Icosane) | C <sub>20</sub> H <sub>42</sub> | 2000 | 282             | 28.336                     |
| Heneicosane          | C <sub>21</sub> H <sub>44</sub> | 2100 | 296             | 29.891                     |
| Docosane             | C <sub>22</sub> H <sub>46</sub> | 2200 | 310             | 31.384                     |
| Tricosane            | C <sub>23</sub> H <sub>48</sub> | 2300 | 324             | 32.817                     |
| Tetracosane          | C <sub>24</sub> H <sub>50</sub> | 2400 | 338             | 34.194                     |
| Pentacosane          | C <sub>25</sub> H <sub>52</sub> | 2500 | 352             | 35.52                      |
| Hexacosane           | C <sub>26</sub> H <sub>54</sub> | 2600 | 366             | 36.793                     |
| Heptacosane          | C <sub>27</sub> H <sub>56</sub> | 2700 | 380             | 38.016                     |
| Octacosane           | C <sub>28</sub> H <sub>58</sub> | 2800 | 394             | 39.211                     |
| Nonacosane           | C <sub>29</sub> H <sub>60</sub> | 2900 | 408             | 40.36                      |
| triacontane          | C <sub>30</sub> H <sub>62</sub> | 3000 | 422             | 41.472                     |
| Hentriacontane       | C <sub>31</sub> H <sub>64</sub> | 3100 | 436             | 42.547                     |
| Dotriacontane        | C <sub>32</sub> H <sub>66</sub> | 3200 | 450             | 43.59                      |
| Tritriacontane       | C <sub>33</sub> H <sub>68</sub> | 3300 | 464             | 44.603                     |
| Tetratriacontane     | C <sub>34</sub> H <sub>70</sub> | 3400 | 478             | 45.587                     |
| Pentatriacontane     | C <sub>35</sub> H <sub>72</sub> | 3500 | 492             | 46.599                     |
| Hexatriacontane      | C <sub>36</sub> H <sub>74</sub> | 3600 | 506             | 47.736                     |
| Heptatriacontane     | C <sub>37</sub> H <sub>76</sub> | 3700 | 520             | 49.039                     |
| Octatriacontane      | C <sub>38</sub> H <sub>78</sub> | 3800 | 534             | 50.544                     |
| Nonatriacontane      | C <sub>39</sub> H <sub>80</sub> | 3900 | 548             | 52.304                     |
| Tetracontane         | C <sub>40</sub> H <sub>82</sub> | 4000 | 562             | 55.001                     |

## Figures

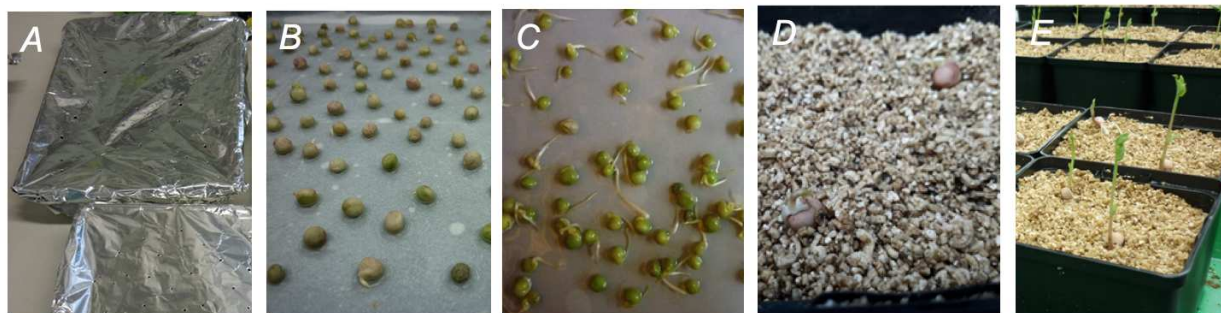

**Figure S1-1** Cultivation of pea (*Pisum sativum* L., cultivar SGE) plants: stratification on wet filter paper in the dark at 4°C during two days (A), germination during two days in the dark (B, C), inoculation with a rhizobial culture *Rhizobium leguminosarum*1026 ICAM (D), and seedling appearance – growing at 16 h light/ 8 h dark regimen at 21°C under 75% relative humidity (G).

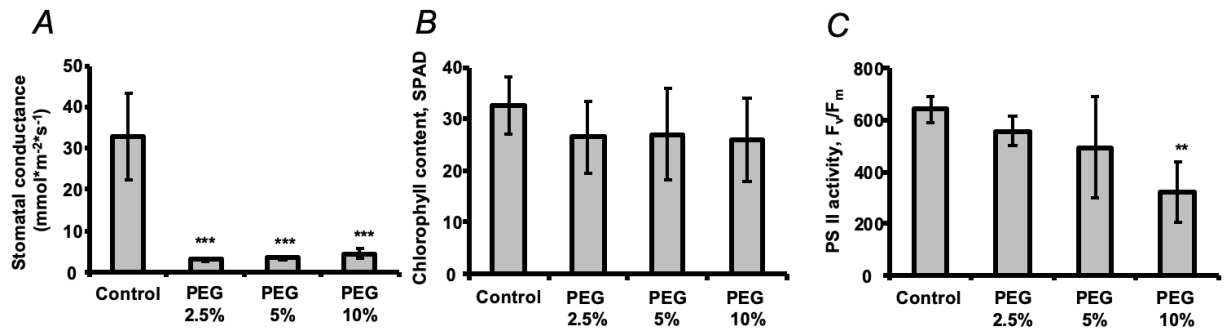

**Figure S1-2** Optimization of experimental drought conditions applied to pea plants pea (*Pisum sativum* L., cultivar SGE) plants at the stage of seed maturation. The plants were transferred from vermiculite to an aqueous aerated medium on the 41<sup>st</sup> day after inoculation (d.a.i.), and five days later (on the 46<sup>th</sup> d.a.i.) - to aqueous medium saturated with PEG-free (control) or PEG 8000 (osmotic stress) at the concentration of 2.5, 5, or 10% (w / v) solutions. After two days of exposure to osmotic stress, the roots of the plants were washed and the plants were transferred to vermiculite. The physiological parameters — stomatal conductivity (A), chlorophyll content (B) and photosystem II (PS II) efficiency (C), were assessed three days later, before the plants were transferred to PEG-free medium.

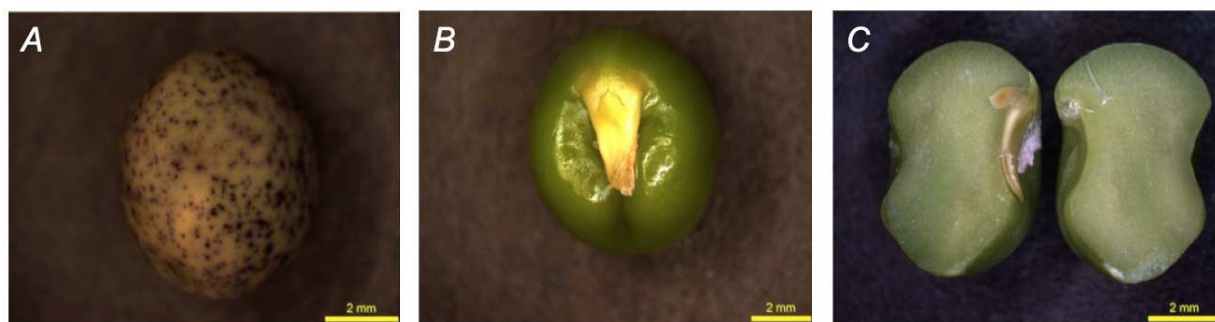

**Figure S1-3** Morphology and anatomy of pea (*Pisum sativum* L., cultivar SGE) seeds: appearance of the seed (A), seed embryo (B) and its longitudinal section (C).

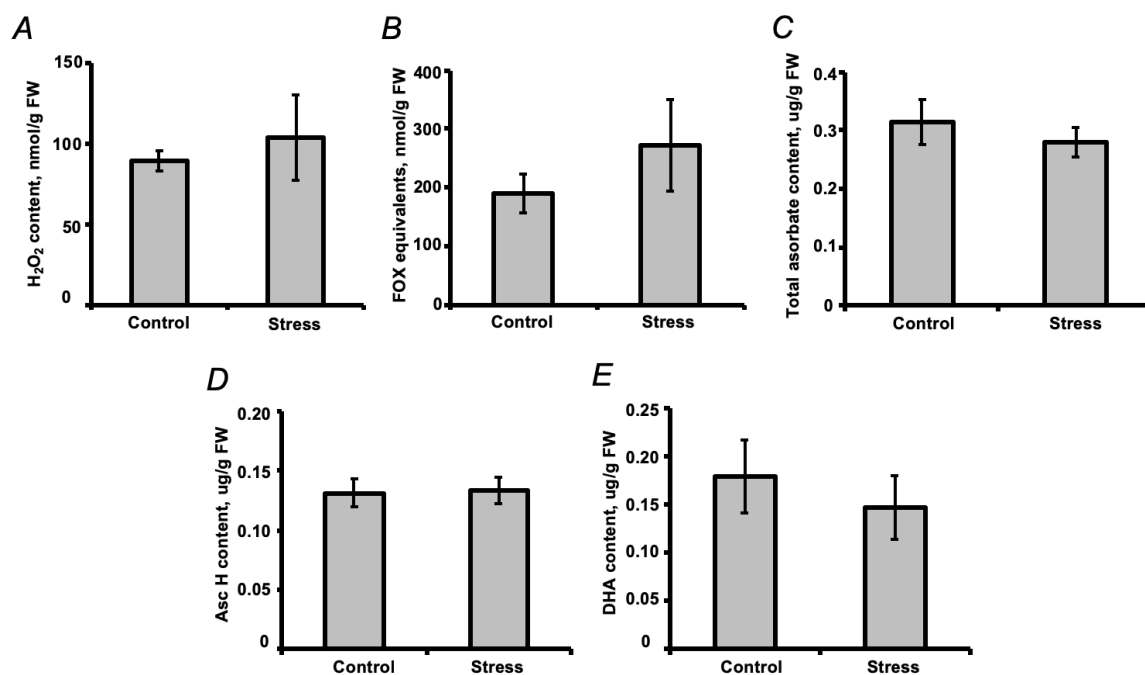

**Figure S1-4** Characterization of the stress response in pea (*Pisum sativum* L., cultivar SGE) leaves, observed after a two-day exposure of mature plants (at the seed maturation step) to the aqueous medium with and without addition of 2.5% (w/v) PEG 8000 (defined as Stress and Control, respectively) by the contents of hydrogen peroxide (A), lipid hydroperoxides (as 13S-hydroperoxy-9Z, 11E-octadecanoic acid equivalents, B), total ascorbate (C), ascorbic acid (D) and dehydroascorbate (E).

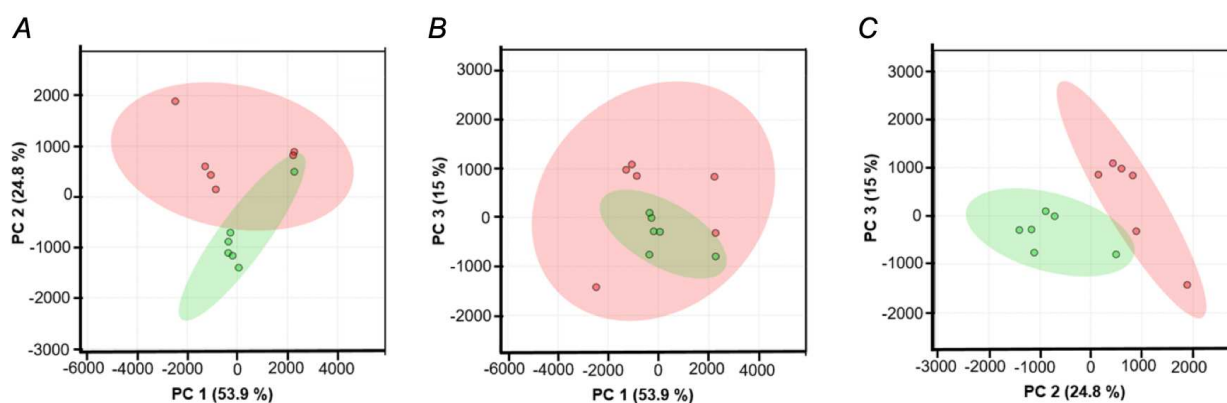

**Figure S1-5** The results of the principal component analysis (PCA), done for the abundances of the primary thermally stable polar metabolites, detected by untargeted gas chromatography-electron ionization-quadrupole mass spectrometry (GC-EI-Q-MS) in aqueous methanolic extracts of mature pea (*Pisum sativum* L., cultivar SGE) seeds after a two-day exposure of mature plants (at the seed maturation step) to the aqueous medium with (green) and without (red) addition of 2.5% (w/v) PEG 8000 (defined as Stress and Control, respectively). The score plots represent PC1 plotted against PC2 (A), PC1 plotted against PC3 (B) and PC2 plotted against PC3 (C).

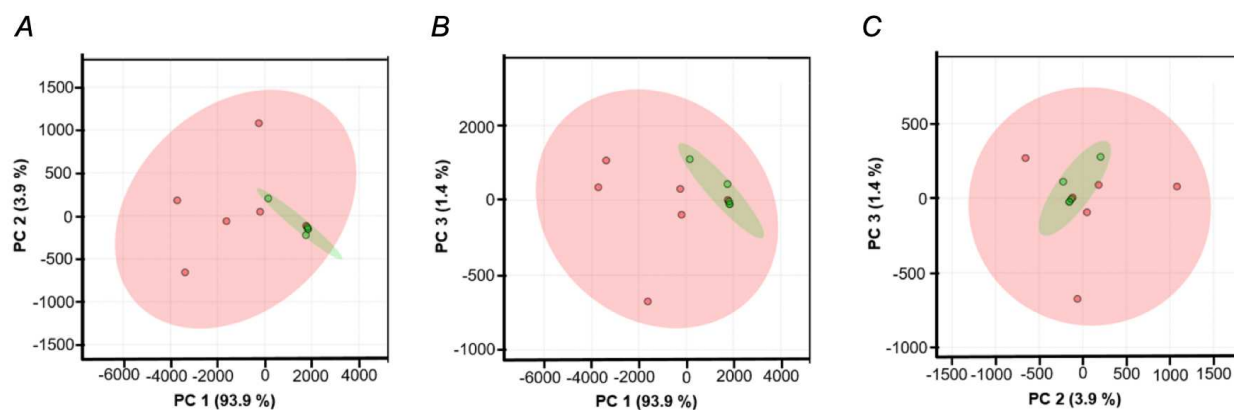

**Figure S1-6** The results of the principal component analysis (PCA), done for the abundances of the primary thermally labile anionic polar metabolites, detected by targeted ion pair-reversed phase ultrahigh performance liquid chromatography, coupled on-line to electrospray ionization-triple quadrupole tandem mass spectrometry (IP-RP-UHPLC-ESI-QqQ-MS/MS) in acidified ethanol-aqueous extracts of mature pea (*Pisum sativum* L., cultivar SGE) seeds after a two-day exposure of mature plants (at the seed maturation step) to the aqueous medium with (green) and without (red) addition of 2.5% (w/v) PEG 8000 (defined as Stress and Control, respectively). The score plots represent PC1 plotted against PC2 (A), PC1 plotted against PC3 (B) and PC2 plotted against PC3 (C).



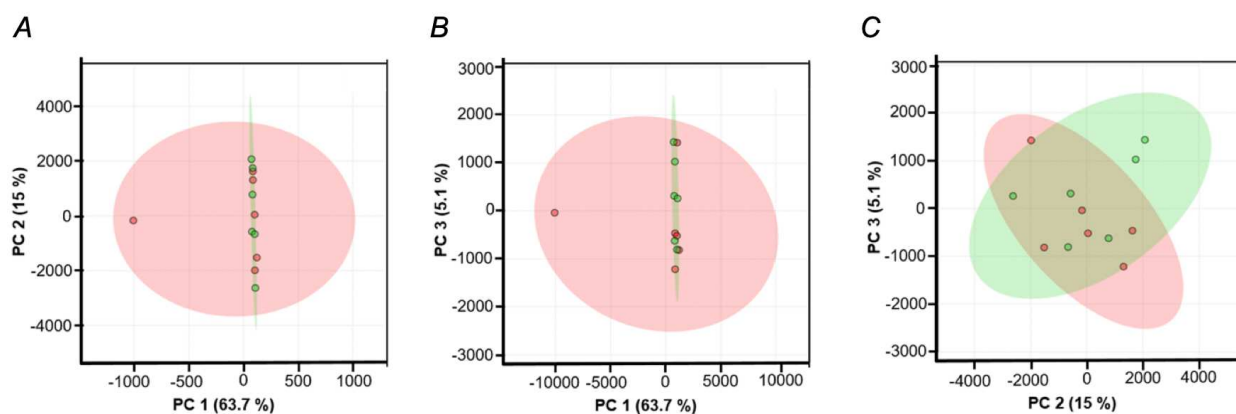

**Figure S1-7** The results of the principal component analysis (PCA), done for the abundances of the anionic semi-polar secondary metabolites, detected by untargeted reversed phase ultrahigh performance liquid chromatography, coupled on-line to electrospray ionization-quadrupole time-of-flight (tandem) mass spectrometry (RP-UHPLC-ESI-QqTOF-MS and MS/MS operated in negative ion mode) in ethanol-dichloromethane extracts of mature pea (*Pisum sativum* L., cultivar SGE) seeds after a two-day exposure of mature plants (at the seed maturation step) to the aqueous medium with (green) and without (red) addition of 2.5% (w/v) PEG 8000 (defined as Stress and Control, respectively). The MS/MS analyses were designed as sequential window acquisition of all theoretical fragment ion spectra (SWATH) experiments. The score plots represent PC1 plotted against PC2 (A), PC1 plotted against PC3 (B) and PC2 plotted against PC3 (C).

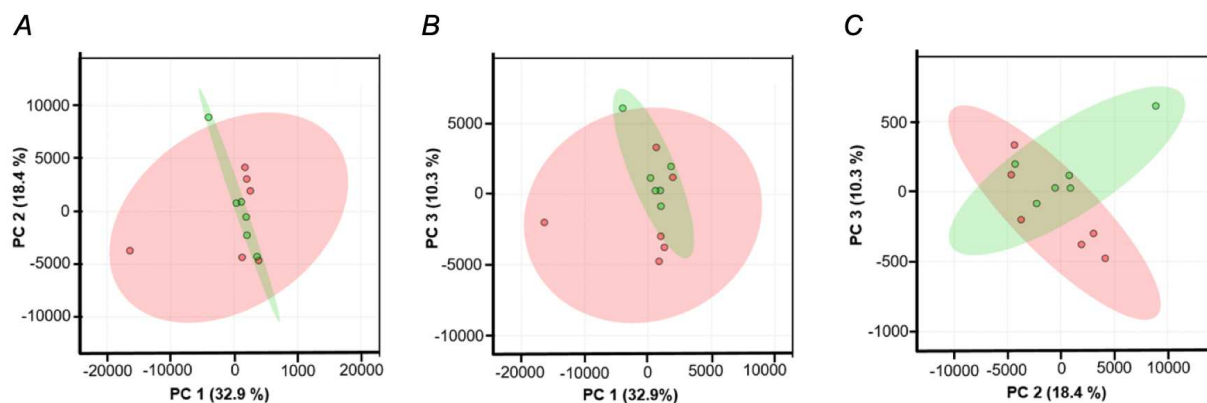

**Figure S1-8** The results of the principal component analysis (PCA), done for the abundances of the cationic semi-polar secondary metabolites, detected by untargeted reversed phase ultrahigh performance liquid chromatography, coupled on-line to electrospray ionization-quadrupole time-of-flight (tandem) mass spectrometry (RP-UHPLC-ESI-QqTOF-MS and MS/MS operated in positive ion mode) in ethanol-dichloromethane extracts of mature pea (*Pisum sativum* L., cultivar SGE) seeds after a two-day exposure of mature plants (at the seed maturation step) to the aqueous medium with (green) and without (red) addition of 2.5% (w/v) PEG 8000 (defined as Stress and Control, respectively). The MS/MS analyses were designed as sequential window acquisition of all theoretical fragment ion spectra (SWATH) experiments. The score plots represent PC1 plotted against PC2 (A), PC1 plotted against PC3 (B) and PC2 plotted against PC3 (C).

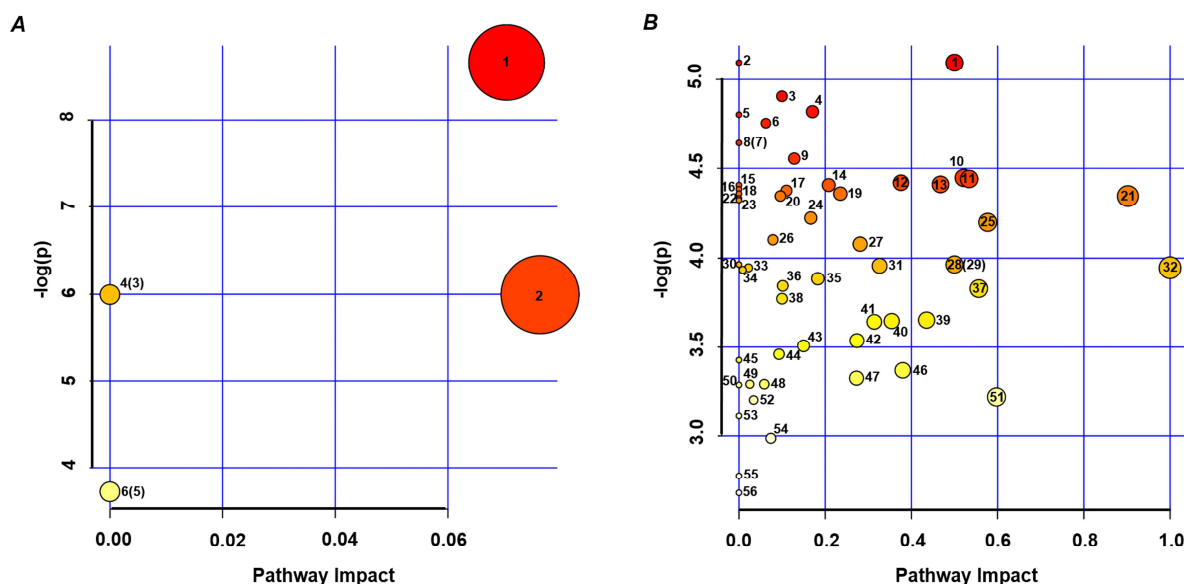

**Figure S1-9** Pathway analyses accomplished separately for the drought-regulated (more than 1.5-fold, t-test  $p < 0.05$ , FDR adjusted at  $p < 0.1$ ) primary polar metabolites of pea (*Pisum sativum* L., cultivar SGE) seeds annotated by untargeted GC-EI-Q-MS (A) and targeted IP-RP-UHPLC-MS/MS (B). **A**: 1, galactose metabolism; 2, glycine, serine and threonine metabolism; 3, cysteine and methionine metabolism; 4, lysine biosynthesis; 5, fructose and mannose metabolism; 6, amino sugar and nucleotide sugar metabolism. **B**: 1, isoquinoline alkaloid biosynthesis; 2, ubiquinone and other terpenoid-quinone biosynthesis; 3, phenylalanine, tyrosine and tryptophan biosynthesis; 4, tryptophan metabolism; 5, indole alkaloid biosynthesis; 6, histidine metabolism; 7, sphingolipid metabolism; 8, sulfur metabolism; 9, glycerophospholipid metabolism; 10, pyrimidine metabolism; 11, glycine, serine and threonine metabolism; 12, arginine and proline metabolism; 13, nicotinate and nicotinamide metabolism; 14,  $\beta$ -alanine metabolism; 15, cyanoamino acid metabolism; 16, nitrogen metabolism; 17, carbon fixation in photosynthetic organisms; 18, porphyrin and chlorophyll metabolism; 19, butanoate metabolism; 20, cysteine and methionine metabolism; 21, alanine, aspartate and glutamate metabolism; 22, glucosinolate biosynthesis; 23, folate biosynthesis; 24, methane metabolism; 25, glutathione metabolism; 26, glycerolipid metabolism; 27, terpenoid backbone biosynthesis; 28, phenylalanine metabolism; 29, phenylpropanoid biosynthesis; 30, tropane, piperidine and

pyridine alkaloid biosynthesis; 31, purine metabolism; 32, synthesis and degradation of ketone bodies; 33, valine, leucine and isoleucine degradation; 34, zeatin biosynthesis; 35, ascorbate and aldarate metabolism; 36, galactose metabolism; 37, starch and sucrose metabolism; 38, pentose and glucuronate interconversions; 39, glyoxylate and dicarboxylate metabolism; 40, citrate cycle (TCA cycle); 41, fatty acid metabolism; 42, pyruvate metabolism; 43, pantothenate and CoA biosynthesis; 44, aminoacyl-tRNA biosynthesis; 45, inositol phosphate metabolism; 46, amino sugar and nucleotide sugar metabolism; 47, tyrosine metabolism; 48, propanoate metabolism; 49, fatty acid biosynthesis; 50, riboflavin metabolism; 51, pentose phosphate pathway; 52, glycolysis or Gluconeogenesis; 53, vitamin B6 metabolism; 54, lysine biosynthesis; 55, valine, leucine and isoleucine biosynthesis; 56, lysine degradation. For more information, please refer to Supplementary 4 and 5.

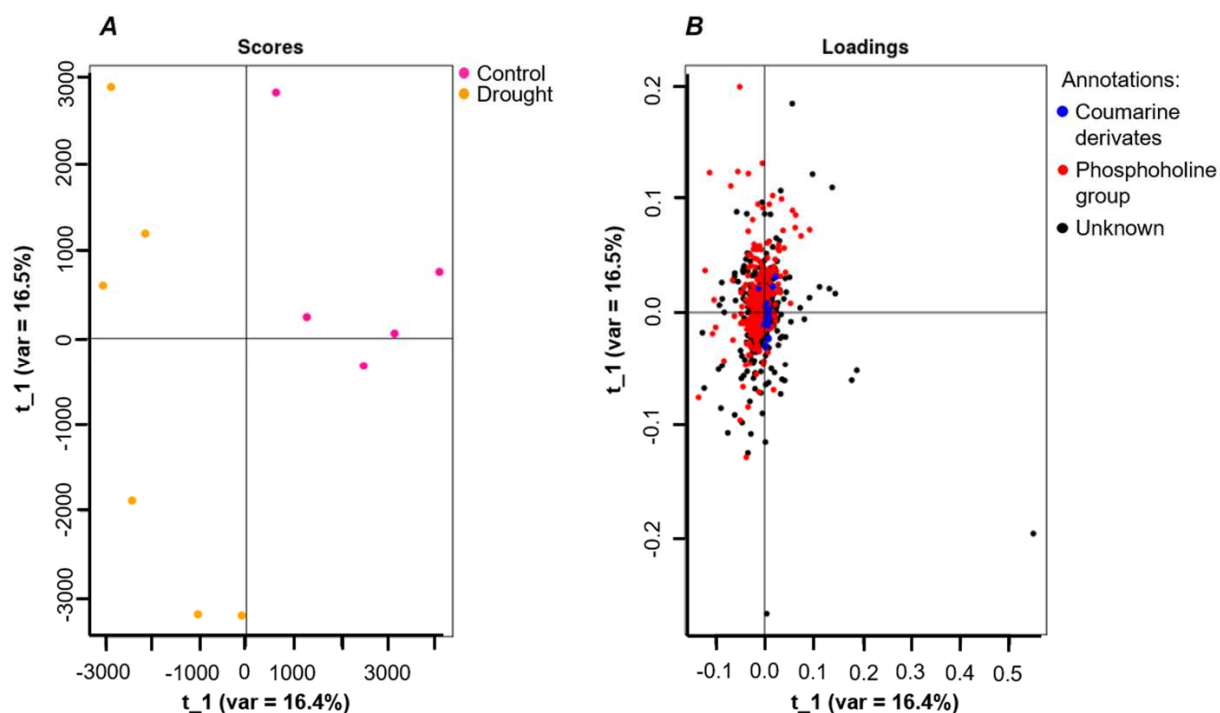

**Figure S1-10** The PLS-DA model (A) and loadings plot (B), designed for 1092 of 2667 semi-polar features annotated by RP-UHPLC-QqTOF-MS operated in positive SWATH mode. The original data matrix was filtered for the presence of isotopes (43 features) and for the MS signal not accompanied with adequate MS/MS spectra (1532 features). Characteristic  $m/z$  of coumarine derivatives: 91.0541, 102.0488, 104.0574, 115.0532, 137.0966, 163.0395; and of phosphoholine group – 184.0737. Annotation of fragments ( $\pm 10$  ppm) and building of the PLS-DA model relied on the online tool MetFamily 1.0 tool (<https://msbi.ipb-halle.de/MetFamilyDevel/>).

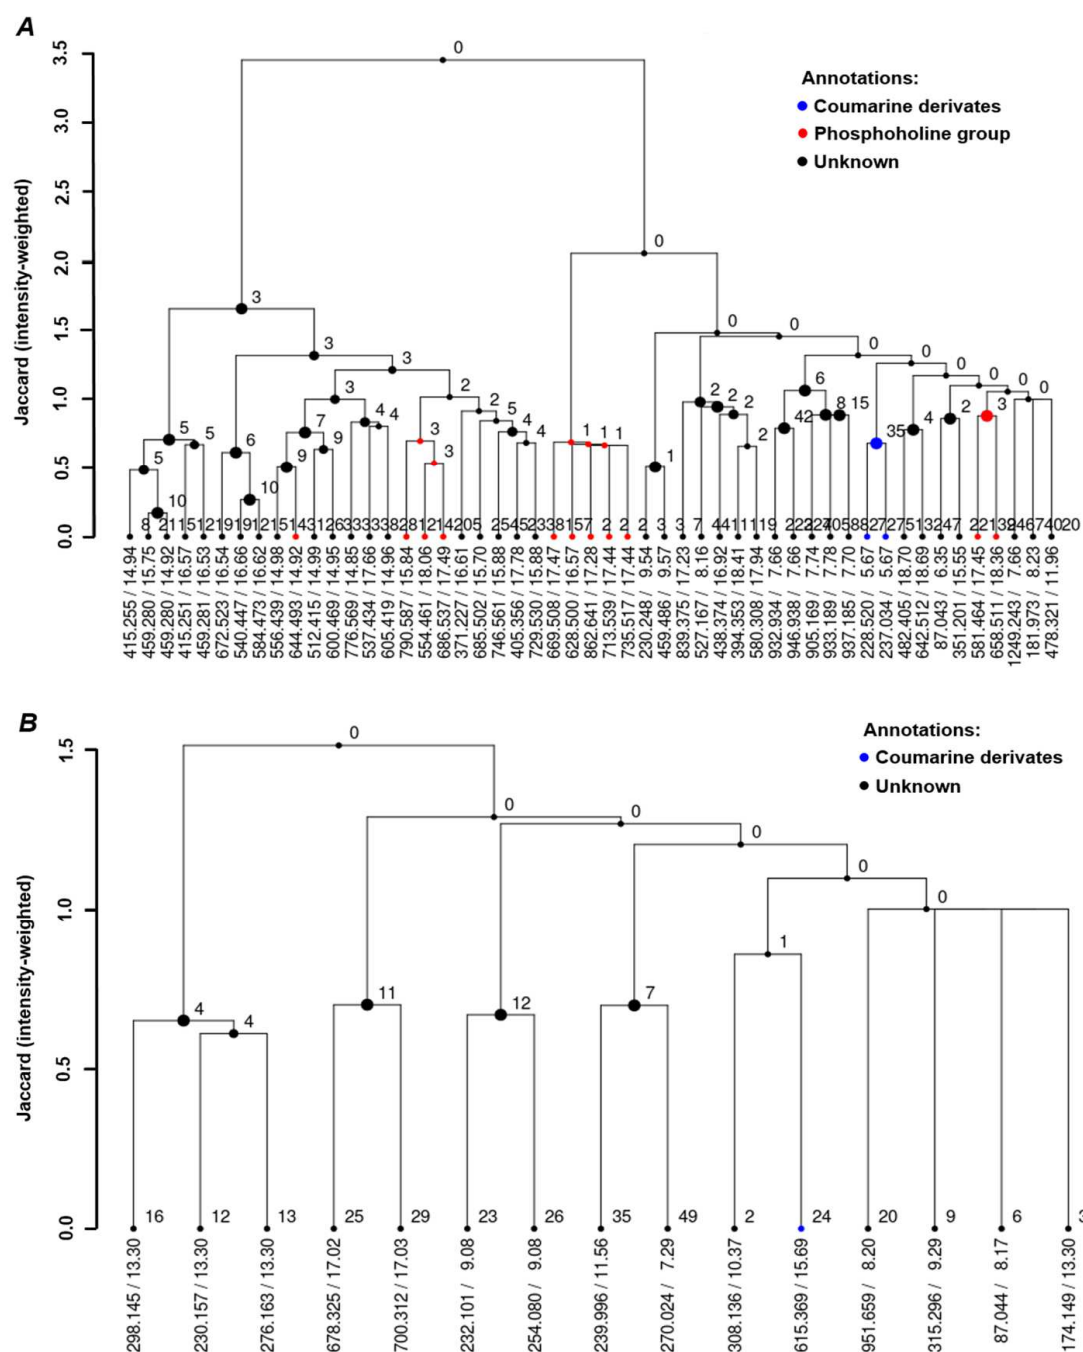

**Figure S1-11** Hierarchical clustering analysis (HCA) of 51 up-regulated (A) and 15 down-regulated (B) drought-related semi-polar metabolite MS features using the corresponding MS/MS spectra obtained from RP-UHPLC-QqTOF-MS operated in positive SWATH mode. For the intergroup (stress-control) comparisons, the set of 1092 MS<sup>1</sup> features was filtered using an MS<sup>1</sup> abundance threshold of 2000 counts and a log<sub>2</sub>-fold change (LFC) of 0.58. Ion fragment search ( $\pm 10$  ppm) and HCA was performed by the online tool MetFamily 1.0 (<https://msbi.ipb-halle.de/MetFamilyDevel>).

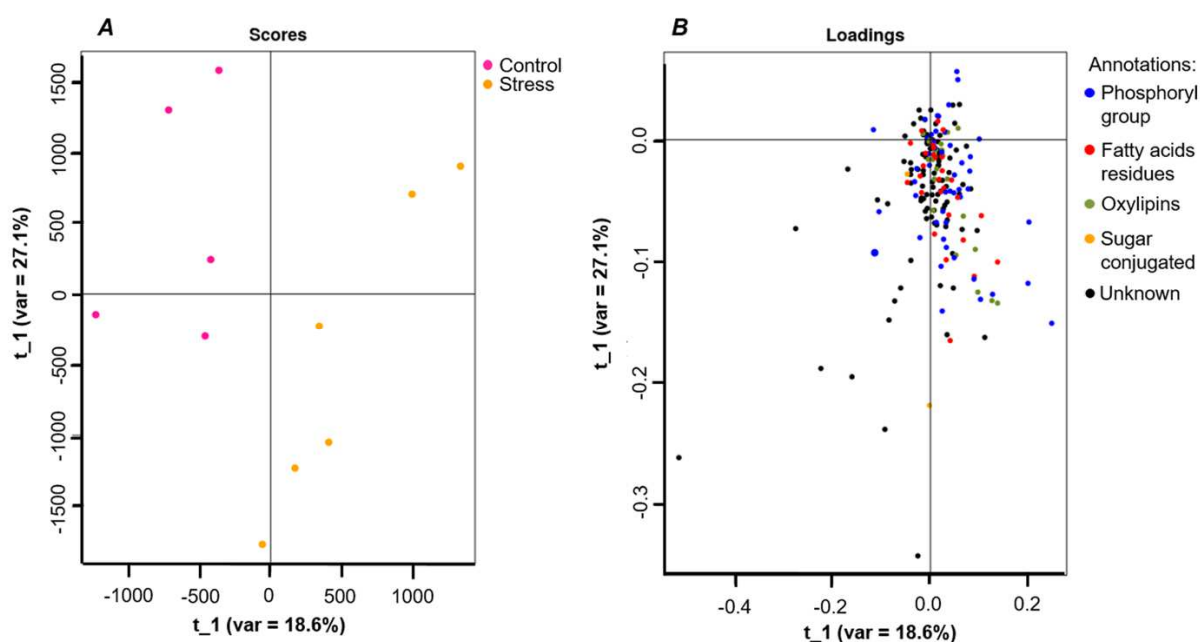

**Figure S1-12** The PLS-DA model (A) and loadings plot (B), designed for 207 of 376 semi-polar metabolites identified by RP-UHPLC-QqTOF-MS operated in negative SWATH mode. The original set (376 features) was filtered for isotopomers and the features without interpretable MS/MS spectra (in total 166 features). The metabolite class of phospholipids was annotated by characteristic fragment signals ( $m/z$ ) of phosphoryl group: 78.9585, 78.9591, 140.0118, 152.996, 168.0431, 171.0064, 196.038 and characteristic fragments ( $m/z$ ) of fatty acid residues: 171.1391, 171.1398 for C10:0, 255.23303 for C16:0 and 279.233 for C18:2. Characteristic  $m/z$  of oxylipins: 183.01; of sugar conjugated metabolites: -303.098370, -323.098, -179.056. Ion fragment search ( $\pm 10$  ppm) and PLS-DA model was performed by the online tool MetFamily 1.0 (<https://msbi.ipb-halle.de/MetFamilyDevel>).

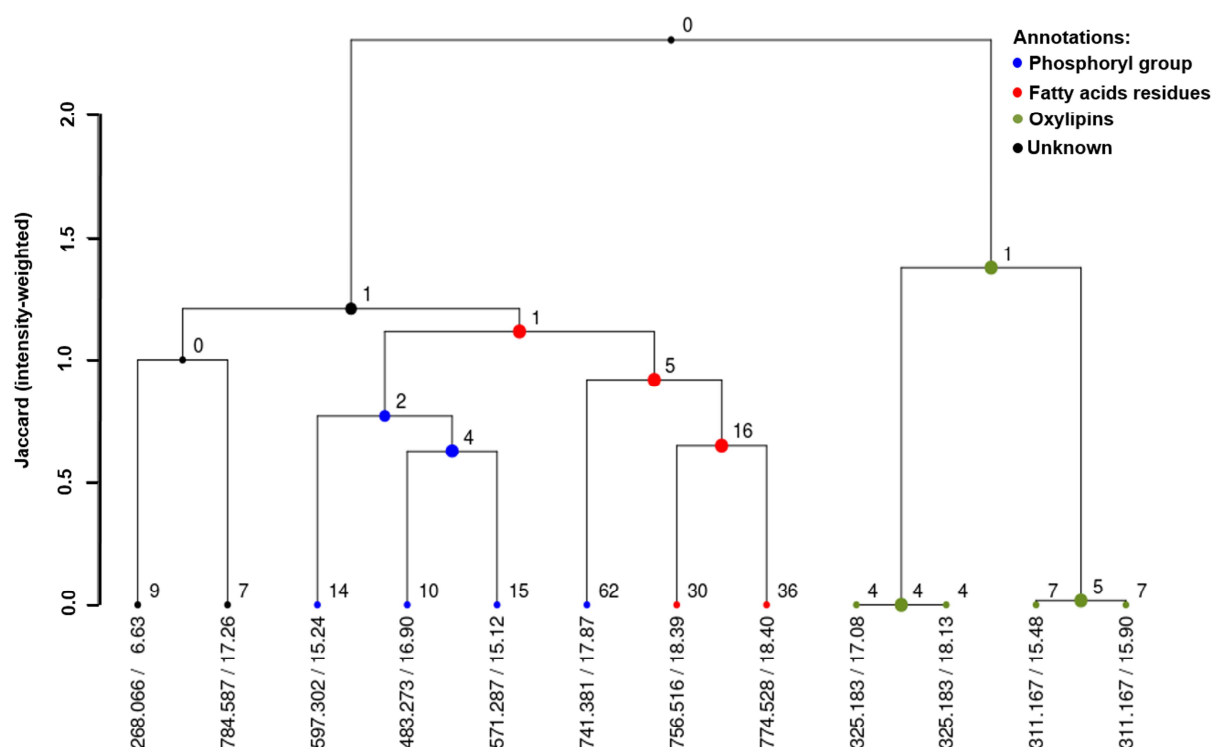

**Figure S1-13** Hierarchical cluster analysis (HCA) of 12 up-regulated drought-related semi-polar metabolites ( $MS^1$ ) using the corresponding  $MS/MS$  spectra obtained from RP-UHPLC-QqTOF-MS operated in negative SWATH mode. For comparison of the control versus stress groups the set of 207  $MS^1$  features was filtered using an  $MS^1$  abundance threshold of 2000 counts, a log2-fold change (LFC) of 0.58. Ion fragment search ( $\pm 10$  ppm) and HCA was performed by the online tool MetFamily 1.0 (<https://msbi.ipb-halle.de/MetFamilyDevel>).



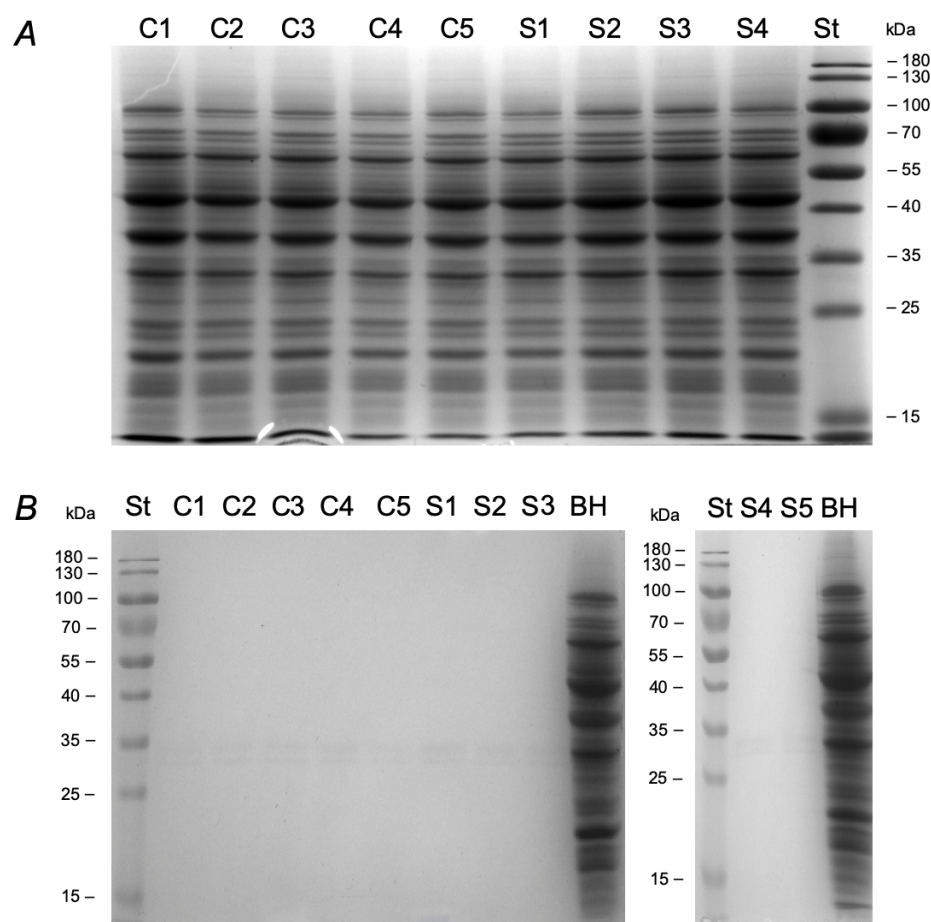

**Figure S1-14** SDS-PAGE electropherograms of pea seed protein before (A) and after (B) exhaustive enzymatic hydrolysis (n=5). The aliquots of samples before hydrolysis (10  $\mu$ g) and aliquots of enzymatic hydrolysates (corresponding to 30  $\mu$ g of protein) were loaded on the gel in 10  $\mu$ L of sample buffer. Total protein fraction was isolated from mature seeds of control (C1-C5) and drought-treated (S1 – S5) pea plants; BH, a reference protein sample, not subjected to hydrolysis; St, molecular weight standard mix - Protein Ladder (PageRuler™ Prestained Protein Ladder #26616 (10–180 kDa).

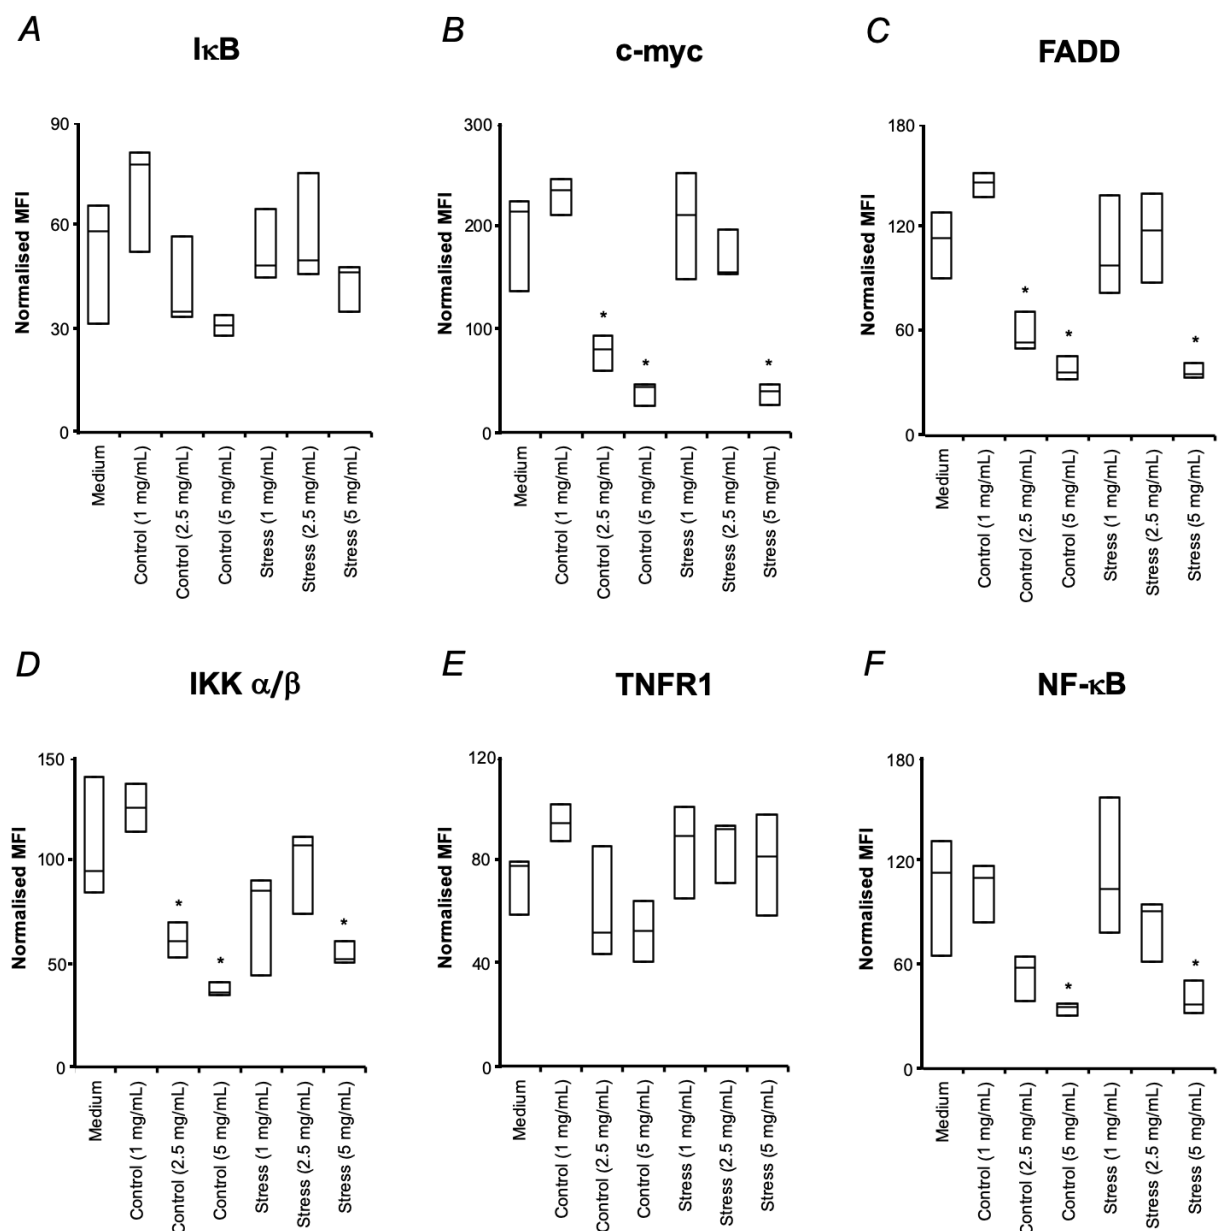

**Figure S1-15** The effects of pea seed protein hydrolyzates on the NF-κB-mediated signaling pathway in SH-SY5Y human neuroblastoma cells: optimization of the applied protein amounts. The total protein fraction was isolated from pea (*Pisum sativum* L., cultivar SGE) seeds after a two-day exposure of mature plants (at the seed maturation step) to the aqueous medium with and without addition of 2.5% (w/v) PEG 8000 (defined as Stress and Control, respectively) and subjected to exhaustive enzymatic hydrolysis. The levels of phosphorylated IκB (A), c-myc (B), FADD (C), IKK α/β (D), TNFR1 (E), NF-κB (F) were determined in SH-SY5Y cell lyzates by Luminex® xMAP® technology after 0.5 h incubations with protein hydrolysates (1, 2.5 and 5 mg/mL), supplemented to the culture medium, and normalized to total protein content. The data

are presented as median, inter-quartile range, minimal and maximal values, and were analyzed by one-way ANOVA with Tukey's multiple comparisons test (n=3). The differences in comparison to the medium-treated cells (control), statistically significant at the confidence level  $p < 0.05$ , are denoted as \*.

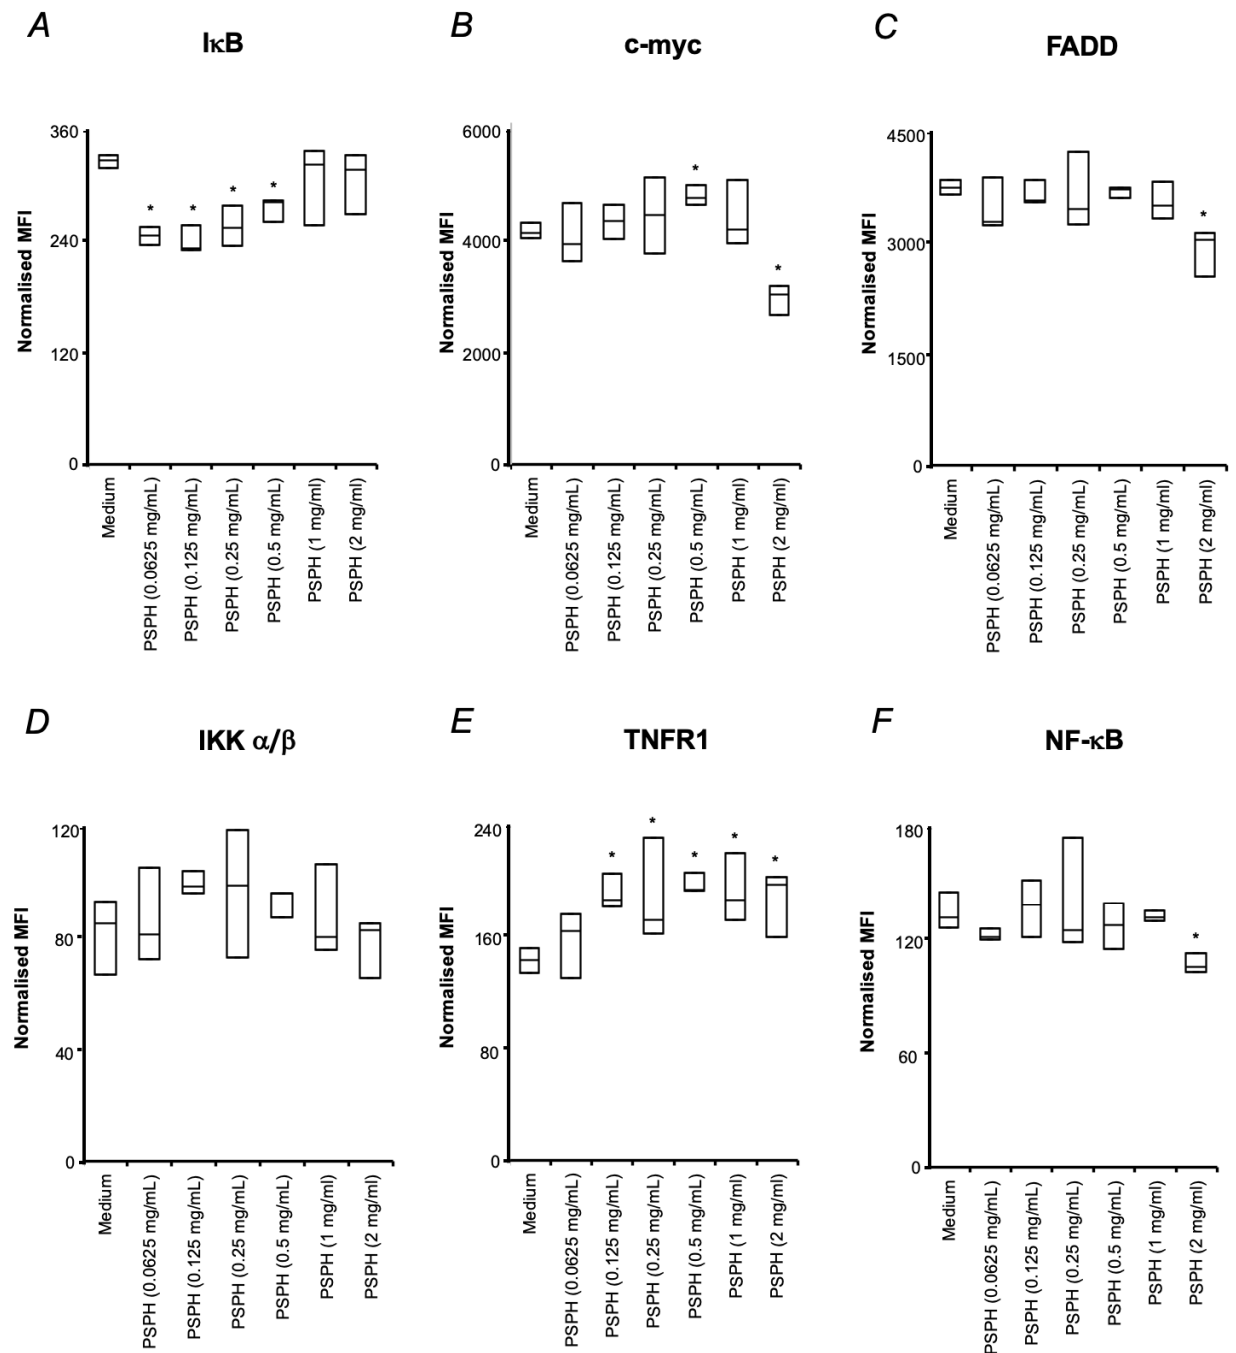

**Figure S1-16** The effects of pea seed protein hydrolyzates on the NF-κB-mediated signaling pathway in SH-SY5Y human neuroblastoma cells: optimization of the applied protein amounts. The total protein fraction was isolated from the seeds obtained from mature pea (*Pisum sativum* L.) plants and subjected to exhaustive enzymatic hydrolysis. The levels of phosphorylated IκB (A), c-myc (B), FADD (C), IKK α/β (D), TNFR1 (E), NF-κB (F) were determined in SH-SY5Y cell lysates by Luminex® xMAP® technology after 0.5 h incubations with protein hydrolysates (0.0625, 0.125, 0.25, 0.5, 1.0 and 2 mg/mL), supplemented to the culture medium, and

normalized to total protein content. The data are presented as median, inter-quartile range, minimal and maximal values, and were analyzed by one-way ANOVA with Tukey's multiple comparisons test (n=3). The differences in comparison to the medium-treated cells (control), statistically significant at the confidence level  $p < 0.05$ , are denoted as \*.

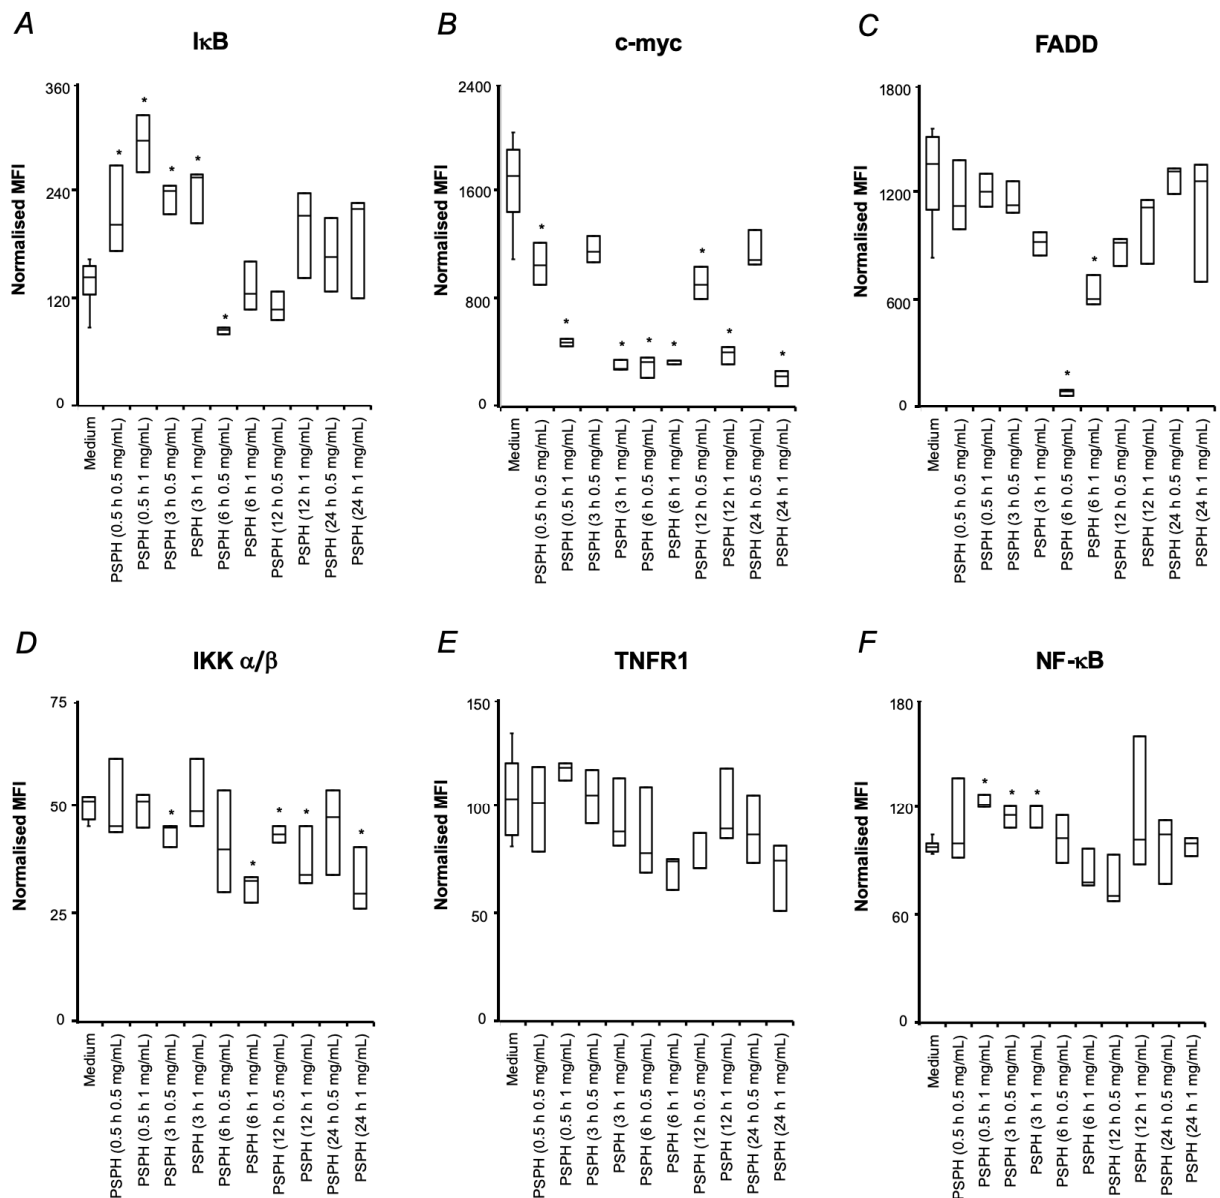

**Figure S1-17** The effects of pea seed protein hydrolysates on the NF-κB-mediated signaling pathway in SH-SY5Y human neuroblastoma cells: optimization of incubation times. The total protein fraction was isolated from the seeds obtained from mature pea (*Pisum sativum* L.) plants and subjected to exhaustive enzymatic hydrolysis. The levels of phosphorylated IκB (A), c-myc (B), FADD (C), IKK α/β (D), TNFR1 (E), NF-κB (F) were determined in SH-SY5Y cell lysates by Luminex® xMAP® technology after 0.5, 3, 6, 12 and 24 h of incubation with protein hydrolysates (0.5 and 1.0 mg/mL), supplemented to the culture medium, and normalized to total protein content. The data are presented as median, inter-quartile range, minimal and maximal values, and were analyzed by one-way ANOVA with Tukey's multiple comparisons test (n=3).

The differences in comparison to the medium-treated cells (control), statistically significant at the confidence level  $p < 0.05$ , are denoted as \*.

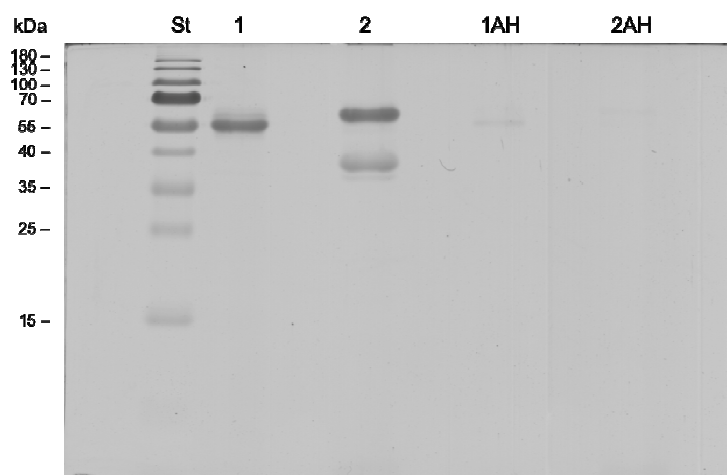

**Figure S1-18** SDS-PAGE electropherograms of yeast carboxypeptidase Y purchased from Merck (Sigma-Aldrich GmbH, 1), and carboxypeptidase Y isolated from the yeast *Saccharomyces cerevisiae* according to the protocol of Johansen *et al* (2). The commercial (1AH) and in-house isolated (2AH) preparations could be hydrolyzed with trypsin (> 95% efficiency based on band density); St, Protein Ladder (PageRuler™ Prestained Protein Ladder #26616 (10–180 kDa)).



## References:

1. Johansen, J.T.; Breddam, K.; Ottesen, M. Isolation of carboxypeptidase Y by affinity chromatography. *Carlsberg Res. Commun.* **1976**, *41*, 1–14.
2. Majovsky, P.; Naumann, C.; Lee, C.-W.; Lassowskat, I.; Trujillo, M.; Dissmeyer, N.; Hoehenwarter, W. Targeted Proteomics Analysis of Protein Degradation in Plant Signaling on an LTQ-Orbitrap Mass Spectrometer. *J. Proteome Res.* **2014**, *13*, 4246–4258.
3. Mamontova, T.; Lukasheva, E.; Mavropolo-Stolyarenko, G.; Proksch, C.; Bilova, T.; Kim, A.; Babakov, V.; Grishina, T.; Hoehenwarter, W.; Medvedev, S.; et al. Proteome Map of Pea ( *Pisum sativum* L .) Embryos Containing Different Amounts of Residual Chlorophylls. *Int. J. Mol. Sci.* **2018**, *19*, 1–20.
4. Mamontova, T.; Afonin, A.M.; Ihling, C.; Soboleva, A.; Lukasheva, E.; Sulima, A.S.; Shtark, O.Y.; Akhtemova, G.A.; Povydysh, M.N.; Sinz, A.; et al. Profiling of seed proteome in pea (*pisum sativum* l.) lines characterized with high and low responsivity to combined inoculation with nodule bacteria and arbuscular mycorrhizal fungi. *Molecules* **2019**, *24*.
5. Gay, C.; Collins, J.; Gebicki, J.M. Hydroperoxide assay with the ferric-xylenol orange complex. *Anal. Biochem.* **1999**, *273*, 149–155.
6. Greifenhagen, U.; Frolov, A.; Blüher, M.; Hoffmann, R. Site-specific analysis of advanced glycation end products in plasma proteins of type 2 diabetes mellitus patients. *Anal. Bioanal. Chem.* **2016**, *408*, 5557–5566.
7. Antonova, K.; Vikhnina, M.; Soboleva, A.; Mehmood, T.; Heymich, M.-L.; Leonova, T.; Bankin, M.; Lukasheva, E.; Gensberger-Reigl, S.; Medvedev, S.; et al. Analysis of Chemically Labile Glycation Adducts in Seed Proteins: Case Study of Methylglyoxal-Derived Hydroimidazolone 1 (MG-H1). *Int. J. Mol. Sci.* **2019**, *20*, 3659.
