# Supplementary material for: Drought-related Changes in the Metabolism and Nutritional Properties of Mature Pea (<em>Pisum sativum L.</em>) Seeds in the Context of Protein Glycation
Source: Preprints.org preprint supplement (doi:10.20944/preprints201912.0133.v1), 2019-12-10
Supplement: Supplementary file 5 [file supplementary]

Archive with 5 entries (5 files):
- 191209_Leonova_et_al_Supplementary information 2.xlsx
- 191209_Leonova_et_al_Supplementary_1.pdf
- 191209_Leonova_et_al_Supplementary_information_3.pdf
- 191209_Leonova_et_al_Supplementary_information_4.pdf
- 191209_Leonova_et_al_Supplementary_information_5.pdf
